# Supplementary material for: Characteristics of ecosystems under various anthropogenic impacts in a tropical forest region of Southeast Asia
Source: Copernicus journal article supplement (doi:10.5194/egusphere-2024-3784), 2025-01-07
Supplement: Supplementary file [file egusphere-2024-3784-CC1-supplement.zip]

# Characteristics of ecosystems under various anthropogenic impacts in a tropical forest region of Southeast Asia

5 Chansopheaktra Sovann<sup>1,2</sup>, Torbern Tagesson<sup>1</sup>, Patrik Vestin<sup>1</sup>, Sakada Sakhoeun<sup>3</sup>, Soben Kim<sup>4</sup>, Sothea Kok<sup>2</sup>, Stefan Olin<sup>1</sup>

<sup>1</sup>Department of Physical Geography and Ecosystem Science, Lund University, Sölvegatan 12, S-223 62 Lund, Sweden

<sup>2</sup>Department of Environmental Science, Royal University of Phnom Penh, Phnom Penh, 120404, Cambodia

<sup>3</sup>Provincial Department of Environment, Ministry of Environment, Siem Reap, 171202, Cambodia

<sup>4</sup>Faculty of Forestry, Royal University of Agriculture, Phnom Penh, 120501, Cambodia

10 *Correspondence to:* Chansopheaktra Sovann (chansopheaktra.sovann@nateko.lu.se)

The copyright of individual parts of the supplement might differ from the article license.

## Contents

|    |                                                                                                                                                                                                                                                                                                                                                                                                            |          |
|----|------------------------------------------------------------------------------------------------------------------------------------------------------------------------------------------------------------------------------------------------------------------------------------------------------------------------------------------------------------------------------------------------------------|----------|
|    | <b>Subsection 1. Characteristics of the forest inventory plots. ....</b>                                                                                                                                                                                                                                                                                                                                   | <b>5</b> |
| 15 | <i>Figure S1.1. Photographs of the forest inventory plots in Phnom Kulen National Park. (a), (b), and (c) are the evergreen forest plots at the south (EF1), middle (EF2), and north (EF3); (e), (f) and (g) are the regrowth forest plots at the south (RF1), middle (RF2), and north (RF3). (h), (j) and (k) are the cashew plantation plots at the south (CP1), middle (CP2), and north (CP3). ....</i> | <b>5</b> |
|    | <i>Figure S1.2. Design of forest inventory plots and sub-plots. ....</i>                                                                                                                                                                                                                                                                                                                                   | <b>6</b> |
| 20 | <i>Table S1.1. Description of the decomposition level used to record lying and standing deadwood decomposition in this study. The proposed five-scale level of decomposition was modified based on a harmonizing scaling system between the Swedish National Forest Inventory (Swedish NFI, 2019) and the Cambodian National Forest Inventory (Than et al., 2018). ....</i>                                | <b>6</b> |
|    | <b>Subsection 2. Meteorological station in Phnom Kulen National Park. ....</b>                                                                                                                                                                                                                                                                                                                             | <b>8</b> |
|    | <i>Figure S2.1. The diagram depicts the installation configuration of weather and photosynthetically active radiation (PAR) sensors at the Kulen Station. The weather sensor was installed at a height of 2.2 m above the ground, while the PAR sensors were placed at a height of 2 m above the ground. ....</i>                                                                                          | <b>8</b> |
|    | <i>Table S2.1. Descriptive statistics of weather parameters at Kulen meteorological station from April 10, 2022, to April 9, 2023, based on 15-minute timestep data. ....</i>                                                                                                                                                                                                                              | <b>8</b> |
| 25 | <i>Figure S2.2. Monthly meteorological conditions at Kulen meteorological station from April 10, 2022, to April 9, 2023. (a) Monthly average air temperature (°C); (b) Monthly total precipitation (mm); (c) Monthly total global radiation (W m<sup>-2</sup>); (d) Monthly average relative humidity (%); (e) Monthly average wind speed (m s<sup>-1</sup>). The error</i>                                |          |

bars in (a), (d), and (e) represent the 95% confidence interval (using standard deviation) from the monthly mean. The data were computed based on 15-minute timestep measurements..... 10

### Subsection 3. Soil conditions in the forest inventory plots..... 11

30 **Figure S3.1.** Monthly mean soil temperature ( $^{\circ}\text{C}$ ) for different land-cover classes from April 10, 2022, to April 9, 2023. The mean values were calculated by averaging the data from two representative plots for each land-cover class. Soil sensors were installed 0.2 m below the ground. .... 11

**Figure S3.2.** Monthly mean water content ( $\text{m}^3 \text{m}^{-3}$ ) for different land-cover classes from April 10, 2022, to April 9, 2023. The mean values were calculated by averaging the data from two representative plots for each land-cover class. Soil sensors were installed 0.2 m below the ground. .... 12

35 **Figure S3.3.** Monthly mean soil saturation extraction electrical conductivity ( $\text{mS cm}^{-1}$ ) for different land-cover classes from April 10, 2022, to April 9, 2023. The mean values were calculated by averaging the data from two representative plots for each land-cover class. Soil sensors were installed 0.2 m below the ground. .... 13

### Subsection 4. Correlation matrix meteorological and soil conditions..... 14

40 **Figure S4.1.** Correlation between daily sum precipitation ('Sum prec.'; mm), daily mean air temperature ('Air temp.';  $^{\circ}\text{C}$ ), daily mean soil temperatures ('stemM';  $^{\circ}\text{C}$ ), daily mean soil water content ('swcM';  $\text{m}^3 \text{m}^{-3}$ ), daily mean soil saturation extraction electrical conductivity ('secM';  $\text{mS cm}^{-1}$ ) at Kulen from April 10, 2022, to April 9, 2023. The suffixes 'EF', 'RF', and 'CP' represent evergreen forests, regrowth forests, and cashew plantations. The precipitation and air temperature data were measured at Kulen's meteorological station (see Fig. 1); meanwhile, the soil data were the average of two measured plots in each land-cover class. .... 14

### Subsection 5. Species diversity. .... 15

45 **Table S5.1.** Percentage of shared species among land-cover classes in the nine-forest inventory plot. The "Count" column indicates the total number of species observed in each land-cover class, whereas the "Sum" column indicates the total number of species recorded in each land-cover class. The "Shared%" column indicates the proportion of each species found in each land-cover class. Within each land-cover class, the "Cumulative Sum%" column displays the cumulative sum percentage, which accumulates from the highest to the lowest percentage of shared species. .... 15

**Table S5.2.** Species richness ( $S_R$ ) and Shannon-Wiener index ( $S_H$ ) across nine forest inventory plots in Kulen, Cambodia. .... 17

### Subsection 6. Functional diversity of different land covers and plots. .... 18

50 **Table S6.1.** Summary of the leaf traits, including leaf dry weight, leaf area, leaf length, specific leaf area (SLA,  $\text{m}^2 \text{kg}^{-1}$ ), chlorophyll a and b content (Chl,  $\text{mg g}^{-1}$ ), and leaf dry matter content (LDMC,  $\text{mg g}^{-1}$ ), obtained from 30 plant woody species found in the Kulen inventory list. The table displays the number of species collected (n), the mean value, standard deviation (SD.), median, minimum (min.), and maximum (max.) value for each trait. .... 18

55 **Table S6.2.** The mean and standard deviation values (SD) of leaf chlorophyll content (SPAD-value), leaf fresh weight (g), leaf dry weight (g), leaf length area (cm), leaf area ( $\text{cm}^2$ ), specific leaf area (SLA,  $\text{m}^2 \text{kg}^{-1}$ ), chlorophyll a and b content (Chl,  $\text{mg g}^{-1}$ ), and leaf dry matter content (LDMC,  $\text{mg g}^{-1}$ ) by species. The data included all 30 plant woody species from inventory data species which was used to compute the community weighted mean for SLA, Chl and LDMC. 'n' is the total number of sample leaves per species. \*Standard deviation values include both the standard deviation of five-time measurements per leaf and the standard deviation of the total number of leaves sampled per species. .... 18

**Table S6.3.** The values of specific leaf area (SLA,  $\text{m}^2 \text{kg}^{-1}$ ), chlorophyll a and b content (Chl,  $\text{mg g}^{-1}$ ), and leaf dry matter content (LDMC,  $\text{mg g}^{-1}$ ) by species and inventory plots. The samples were collected from cashew plantations (CP), regrowth forests (RF), evergreen forests (EF), and the areas within 500 m of EF and RF plots (EF123 and RF123). In the SLA, Chl, and LDMC columns, 'n' = the number of leaf samples, 'Mean' = the mean value, and 'SD' = the standard deviation value. .... 19

|    |                                                                                                                                                                                                                                                                                                                                                                                                                                                                                                                                                                                                                                                                                                                                                                                                                                                                                                                                                                                                                              |           |
|----|------------------------------------------------------------------------------------------------------------------------------------------------------------------------------------------------------------------------------------------------------------------------------------------------------------------------------------------------------------------------------------------------------------------------------------------------------------------------------------------------------------------------------------------------------------------------------------------------------------------------------------------------------------------------------------------------------------------------------------------------------------------------------------------------------------------------------------------------------------------------------------------------------------------------------------------------------------------------------------------------------------------------------|-----------|
| 60 | <b>Table S6.4.</b> Woody species trait value sources and their shared percentages by plot of the data used to compute community weighted mean (CWM). In the column "Trait data source", the value "Plot" is species trait values derived directly from the species collected in its plot, "LC" value is species trait values obtained from its land-cover class when the trait species was not collected in its plot, and "Pool" value is trait values obtained from other land covers in Kulen; The column "Count" indicates the shared number of tree stands in the plot; "Total" is the total number of trees in the plot; and "Shared %" is the shared percentage of trees with different trait sources. "n. missing species" column is the number of missing species in each plot; the "Species" column contains the missing species in each plot. Seedlings were not included in this figure as they do not have DBH records and are not used in community weighted-mean calculations. ....                            | 21        |
| 65 | <b>Subsection 7. Stand structure of different land-cover classes and plots.....</b>                                                                                                                                                                                                                                                                                                                                                                                                                                                                                                                                                                                                                                                                                                                                                                                                                                                                                                                                          | <b>23</b> |
|    | <b>Figure S7.1.</b> The frequency distributions of tree diameters at the breast height (DBH, cm) and height (H, m) across different plots. The plot labels "EF", "RF", and "CP" correspond to "evergreen forests", "regrowth forests" and "cashew plantations" respectively. ....                                                                                                                                                                                                                                                                                                                                                                                                                                                                                                                                                                                                                                                                                                                                            | 23        |
|    | <b>Table S7.1.</b> Ordinary least square regression statistical table of between diameter at breast height $\ln(\text{DBH})$ (cm) and height $\ln(H)$ (m) for evergreen forests (EF), regrowth forests (RF), and cashew plantations (CP) in Kulen. ....                                                                                                                                                                                                                                                                                                                                                                                                                                                                                                                                                                                                                                                                                                                                                                      | 24        |
| 70 | <b>Figure S7.2.</b> Relationship between diameter at breast height $\ln(\text{DBH})$ (cm) and height $\ln(H)$ (m) for different inventory plots in evergreen forests (EF), regrowth forests (RF), and cashew plantations (CP) in Kulen. In (a), (b) and (c) present $\ln(\text{DBH})$ (cm) and $\ln(H)$ (m) relationships at plots EF1, EF2, and EF3 of the evergreen forests; In (d), (e) and (f) present $\ln(\text{DBH})$ (m) and $\ln(H)$ (m) relationships at plots RF1, RF2, and RF3 of regrowth forests; in (g), (h) and (i) present DBH (cm) and H (m) relationships at plots CP1, CP2, and CP3 of cashew plantation. Based on the relationship below, the intercept parameter ( $K_1$ ) and slop parameter ( $K_2$ ) of the power law relationship between DBH (cm) and H (m) for each plot were obtained. The $K_1$ and $K_2$ parameters were used as community traits to investigate the relationship among other biodiversity and ecosystem property variables of various land-cover classes by plot level. .... | 25        |
| 75 | <b>Table S7.2.</b> The computed values of the intercept parameter ( $K_1$ ) and slop parameter ( $K_2$ ) of power-law relationship between diameter at breast height (DBH) (cm) and height (H) (m) for each plot. ....                                                                                                                                                                                                                                                                                                                                                                                                                                                                                                                                                                                                                                                                                                                                                                                                       | 26        |
|    | <b>Figure S7.3.</b> The 1:1 line plot comparison between aboveground biomass (AGB, kg) estimated by the diameter at breast height (DBH) and height (H) relationship ( $\text{AGB}_h$ , kg) and aboveground biomass estimated by adopted functions ( $\text{AGB}_f$ , kg) for evergreen forests (EF) (a), regrowth forests (RF) (b), and cashew plantations (CP) (c). ....                                                                                                                                                                                                                                                                                                                                                                                                                                                                                                                                                                                                                                                    | 26        |
| 80 | <b>Figure S7.4.</b> The estimation of aboveground biomass (AGB) ( $\text{Mg ha}^{-1}$ ) by different methods for each inventory plot. " $\text{AGB}_f$ " represents aboveground biomass estimated by adopted functions; " $\text{AGB}_{wd}$ " represents aboveground biomass estimated by adopted functions utilizing species-specific wood density; " $\text{AGB}_h$ " represents aboveground biomass estimated by the diameter at breast height (DBH) and height (H) relationship, along with species-specific wood density, for our study site. ....                                                                                                                                                                                                                                                                                                                                                                                                                                                                      | 27        |
|    | <b>Figure S7.5.</b> The 1:1 line plot comparison between aboveground biomass estimated by diameter at breast height (DBH) and height (H) relationship ( $\text{AGB}_h$ ) and aboveground biomass estimated by adopted functions ( $\text{AGB}_f$ ) for evergreen forest plots (EF1, EF2, and EF3) (a, b, and c), regrowth forest plots (RF1, RF2, and RF3) (d, e, and f), and cashew plantation plots (CP1, CP2, CP3) (g, h, and i). ....                                                                                                                                                                                                                                                                                                                                                                                                                                                                                                                                                                                    | 28        |
| 85 | <b>Table S7.3.</b> Distribution of stem density per hectare by DBH class for different land-cover classes. EF, RF, and CP stand for evergreen forests, regrowth forests, and cashew plantations. ....                                                                                                                                                                                                                                                                                                                                                                                                                                                                                                                                                                                                                                                                                                                                                                                                                        | 29        |
|    | <b>Table S7.4.</b> Distribution of aboveground biomass (AGB) across diameter at breast height (DBH) classes for different land-cover classes. The total AGB estimated by $\text{AGB}_h$ method was used in the calculation. EF, RF and CP stand for evergreen forests, regrowth forests, and cashew plantations. ....                                                                                                                                                                                                                                                                                                                                                                                                                                                                                                                                                                                                                                                                                                        | 29        |
| 90 | <b>Subsection 8. Leaf area index and a fraction of absorbed photosynthetically active radiation. ....</b>                                                                                                                                                                                                                                                                                                                                                                                                                                                                                                                                                                                                                                                                                                                                                                                                                                                                                                                    | <b>30</b> |

|     |                                                                                                                                                                                                                                                                                                                                                                                                                                                                                                                                                                                                                                                                                                                                                                                                                            |    |
|-----|----------------------------------------------------------------------------------------------------------------------------------------------------------------------------------------------------------------------------------------------------------------------------------------------------------------------------------------------------------------------------------------------------------------------------------------------------------------------------------------------------------------------------------------------------------------------------------------------------------------------------------------------------------------------------------------------------------------------------------------------------------------------------------------------------------------------------|----|
|     | <b>Table S8.1.</b> Descriptive statistics of observed leaf area index (LAI) ( $\text{m}^2 \text{m}^{-2}$ ) measured at breast height and ground height for evergreen forests (EF), regrowth forests (RF), and cashew plantations (CP) by different months of a year. The "Month" column represents the months of the year (1 = January and 12 = December). The "n" column indicates the number of measurements in a specific month for each land cover. ....                                                                                                                                                                                                                                                                                                                                                               | 30 |
|     | <b>Subsection 9. Relationships among ecosystem characteristics</b> .....                                                                                                                                                                                                                                                                                                                                                                                                                                                                                                                                                                                                                                                                                                                                                   | 31 |
| 95  | <b>Table S9.1.</b> Ordinary least squares regression model fit statistics for $\ln(\text{AGB}_h)$ and $\ln(S_R)$ , $\ln(\text{AGB}_h)$ and $\ln(\text{LAI}_T)$ , and $\ln(\text{AGB}_h)$ and $\ln(\text{SLA}_{\text{cwm}})$ . The number of observations is the number of plots. 'LAI <sub>T</sub> ' is a mean of total leaf area index, 'AGB <sub>h</sub> ' is aboveground biomass, 'SLA <sub>cwm</sub> ' is a community-weighted mean. ....                                                                                                                                                                                                                                                                                                                                                                              | 31 |
| 100 | <b>Figure S9.1.</b> The relationship between biodiversity and ecosystem property variables of different land-cover classes in Kulen. 'EF', 'RF', and 'CP' are evergreen forests, regrowth forests and cashew plantations. The suffixes '1', '2', and '3' are plot ID. The variables: 'Mean LAI' means LAI measured at the ground level ( $\text{m}^2 \text{m}^{-2}$ ), 'SLA <sub>cwm</sub> ' is community weighted mean of specific leaf area ( $\text{kg m}^{-2}$ ), and 'Species richness' is the counted number of species in each sample plot. 'K <sub>1</sub> ' and 'K <sub>2</sub> ' are the intercept and slope of the relationship between H and DBH at plot level (unitless). 'AGB' is aboveground biomass ( $\text{Mg ha}^{-1}$ ) computed based on the relationship between DBH and H (AGB <sub>h</sub> ). .... | 33 |
|     | <b>Subsection 10. Comparison of species richness, Shannon-Wiener index and LAI with previous studies</b> .....                                                                                                                                                                                                                                                                                                                                                                                                                                                                                                                                                                                                                                                                                                             | 34 |
|     | <b>Table S10.1.</b> Comparison of species richness ( $S_R$ ) with previous studies. ....                                                                                                                                                                                                                                                                                                                                                                                                                                                                                                                                                                                                                                                                                                                                   | 34 |
|     | <b>Table S10.2.</b> Comparison of Shannon-Wiener index ( $S_H$ ) with previous studies.....                                                                                                                                                                                                                                                                                                                                                                                                                                                                                                                                                                                                                                                                                                                                | 34 |
| 105 | <b>Table S10.3.</b> Comparing canopy leaf area index (LAI <sub>c</sub> ) and total leaf area index (LAI <sub>T</sub> ) of evergreen forests (EF) and regrowth forests (RF) with previous studies. Mean $\pm$ SD or SEM is a mean plus or minus a standard deviation or a standard error of a mean. ....                                                                                                                                                                                                                                                                                                                                                                                                                                                                                                                    | 35 |



## Subsection 1. Characteristics of the forest inventory plots.

115

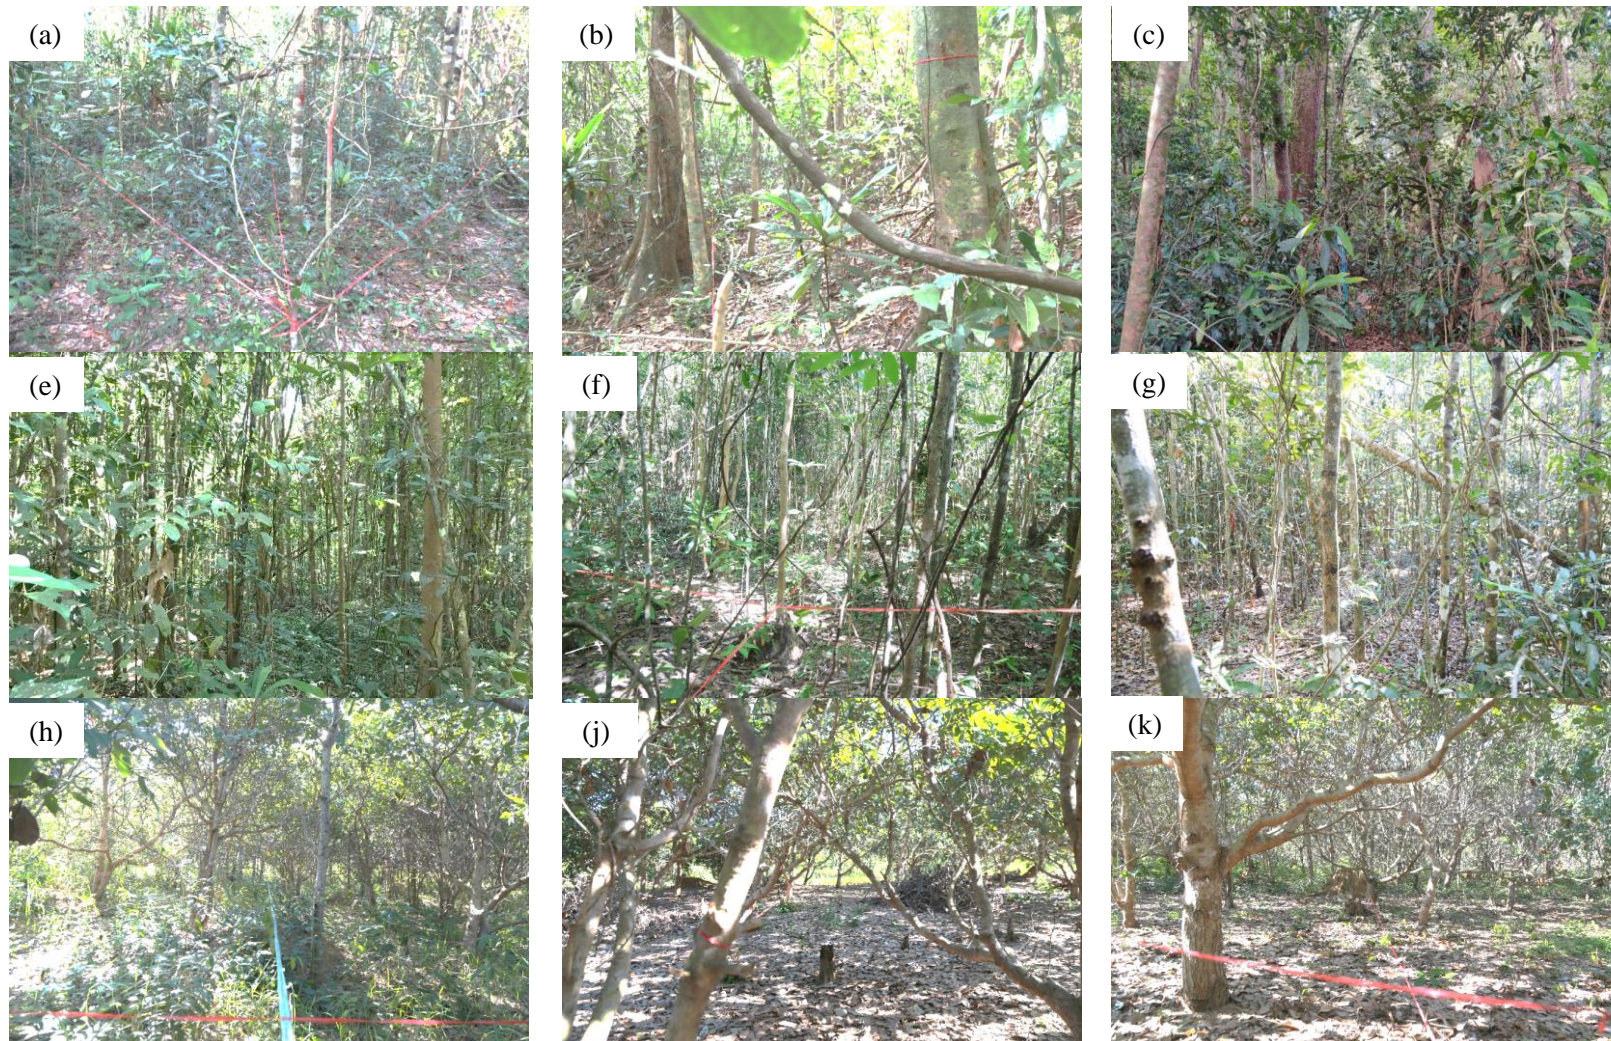

**Figure S1.1.** Photographs of the forest inventory plots in Phnom Kulen National Park. (a), (b), and (c) are the evergreen forest plots at the south (EF1), middle (EF2), and north (EF3); (e), (f) and (g) are the regrowth forest plots at the south (RF1), middle (RF2), and north (RF3). (h), (j) and (k) are the cashew plantation plots at the south (CP1), middle (CP2), and north (CP3).

120

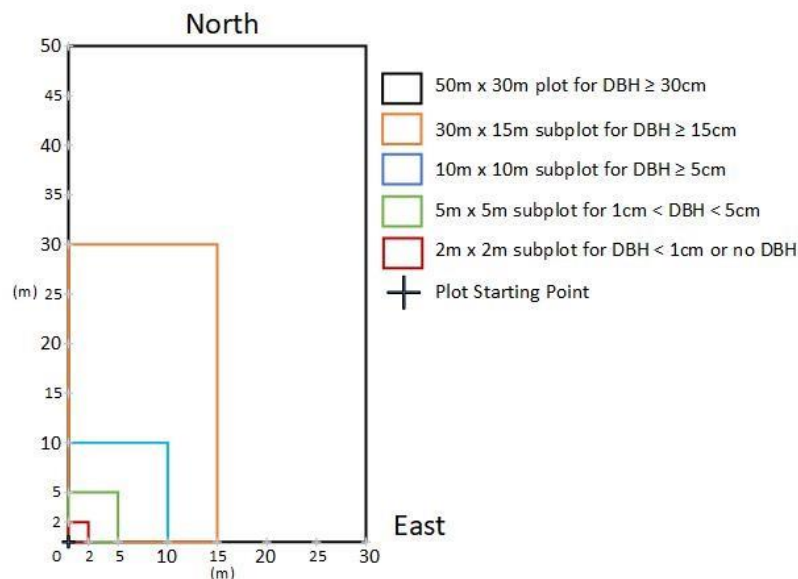

**Figure S1.2.** Design of forest inventory plots and sub-plots.

125

**Table S1.1.** Description of the decomposition level used to record lying and standing deadwood decomposition in this study. The proposed five-scale level of decomposition was modified based on a harmonizing scaling system between the Swedish National Forest Inventory (Swedish NFI, 2019) and the Cambodian National Forest Inventory (Than et al., 2018).

| Proposed in this study |       |                                                                                                                                                                                                                                | Cambodian NFI |                                |       | Swedish NFI                                                                                                                                                                                                                 |  |
|------------------------|-------|--------------------------------------------------------------------------------------------------------------------------------------------------------------------------------------------------------------------------------|---------------|--------------------------------|-------|-----------------------------------------------------------------------------------------------------------------------------------------------------------------------------------------------------------------------------|--|
| N.                     | Scale | Definition                                                                                                                                                                                                                     | Scale         | Definition                     | Scale | Definition                                                                                                                                                                                                                  |  |
| 1                      | 1     | Raw wood. E.g. recently <b>downed trees with green leaves</b> . Also trees with raw cambium when green leaves are missing.                                                                                                     | 1             | Solid wood material            | 0     | Raw wood. E.g. recently downed trees with green leaves. Also trees with raw cambium when green leaves are missing.                                                                                                          |  |
| 2                      | 1.5   | Hard dead wood. The stem volume consists of less than <b>10% soft wood</b> (Decomposed part of stem compares to its original diameters) and a hard mantle area. Very little signs of decomposition of the stem.                | 1             | Solid wood material            | 1     | Hard dead wood. The stem volume consists of more than 90% hard wood and a hard mantle area. Very little signs of decomposition of the stem.                                                                                 |  |
| 3                      | 2     | Somewhat decomposed wood. The volume of the stem consists of <b>10–25% soft wood</b> . Remaining stem consists of hard wood. A tool, e.g. an earth spike can be pushed through the mantle, but not through the entire sapwood. | 2             | Partially rotten wood material | 2     | Somewhat decomposed wood. The volume of the stem consists of 10–25% soft wood. The remaining stem consists of hard wood. A tool, e.g., an earth spike can be pushed through the mantel, but not through the entire sapwood. |  |



|   |     |                                                                                                                                                                                                   |   |                                         |   |                                                                                                                                                                                           |
|---|-----|---------------------------------------------------------------------------------------------------------------------------------------------------------------------------------------------------|---|-----------------------------------------|---|-------------------------------------------------------------------------------------------------------------------------------------------------------------------------------------------|
| 4 | 2.5 | Decomposed dead wood. The stem volume consists of <b>26–75% soft or very soft wood</b> .                                                                                                          | 2 | Partially rotten wood material          | 3 | Decomposed dead wood. The stem volume consists of 26–75% soft or very soft wood.                                                                                                          |
| 5 | 3   | Very decomposed dead wood. The stem volume consists of <b>76–100% soft or very soft wood</b> . A tool, e.g. an earth spike can be pushed through the entire stem. However, a hard core can exist. | 3 | Fully or partially rotten wood material | 4 | Very decomposed dead wood. The stem volume consists of 76–100% soft or very soft wood. A tool, e.g. an earth spike can be pushed through the entire stem. However, a hard core can exist. |

---

## Subsection 2. Meteorological station in Phnom Kulen National Park.

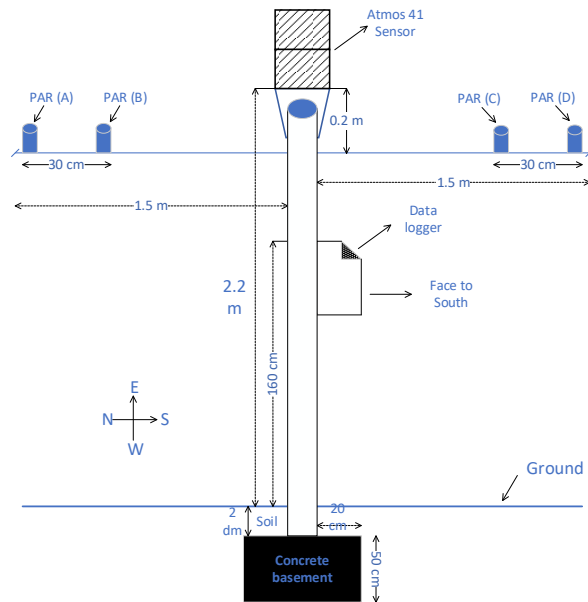

**Figure S2.1.** The diagram depicts the installation configuration of weather and photosynthetically active radiation (*PAR*) sensors at the Kulen Station. The weather sensor was installed at a height of 2.2 m above the ground, while the *PAR* sensors were placed at a height of 2 m above the ground.

**Table S2.1.** Descriptive statistics of weather parameters at Kulen meteorological station from April 10, 2022, to April 9, 2023, based on 15-minute timestep data.

| Parameters                                    | n     | Mean   | SD     | Median | Min   | Max     | Sum        |
|-----------------------------------------------|-------|--------|--------|--------|-------|---------|------------|
| Global Radiation ( $\text{W m}^{-2}$ )        | 35032 | 172.36 | 250.36 | 2.50   | 0.00  | 1065.60 | 6038158.00 |
| Air Temperature ( $^{\circ}\text{C}$ )        | 35032 | 24.22  | 4.16   | 23.80  | 10.50 | 37.00   | 848479.00  |
| Precipitation (mm)                            | 35032 | 0.07   | 0.69   | 0.00   | 0.00  | 24.82   | 2290.03    |
| Max Precipitation Rate ( $\text{mm h}^{-1}$ ) | 35032 | 0.65   | 5.75   | 0.00   | 0.00  | 147.90  | 22924.10   |
| Wind Direction ( $^{\circ}$ )                 | 34602 | 196.84 | 91.06  | 219.00 | 0.00  | 359.00  | 6811055.00 |
| Wind Speed ( $\text{m s}^{-1}$ )              | 34602 | 0.68   | 0.44   | 0.58   | 0.03  | 4.91    | 23416.40   |
| Gust Speed ( $\text{m s}^{-1}$ )              | 34602 | 1.71   | 1.27   | 1.38   | 0.07  | 10.95   | 59123.04   |
| Relative Humidity (%)                         | 35032 | 87.73  | 11.82  | 92.40  | 38.00 | 100.70  | 3073211.20 |
| RH Sensor Temp ( $^{\circ}\text{C}$ )         | 35032 | 25.01  | 5.24   | 23.80  | 10.10 | 40.00   | 876038.60  |



|                            |       |       |      |       |       |        |            |
|----------------------------|-------|-------|------|-------|-------|--------|------------|
| Atmospheric Pressure (kPa) | 35032 | 97.47 | 0.28 | 97.46 | 96.50 | 98.44  | 3414504.80 |
| VPD (kPa)                  | 34602 | 0.45  | 0.51 | 0.22  | 0.00  | 3.11   | 15535.38   |
| Reference Pressure (kPa)   | 35034 | 97.32 | 0.28 | 97.31 | 96.35 | 98.29  | 3409502.75 |
| Lightning Activity (count) | 35032 | 0.14  | 2.59 | 0.00  | 0.00  | 232.00 | 4935.00    |
| Lightning Distance (km)    | 35032 | 0.29  | 2.30 | 0.00  | 0.00  | 37.00  | 10330.00   |

---

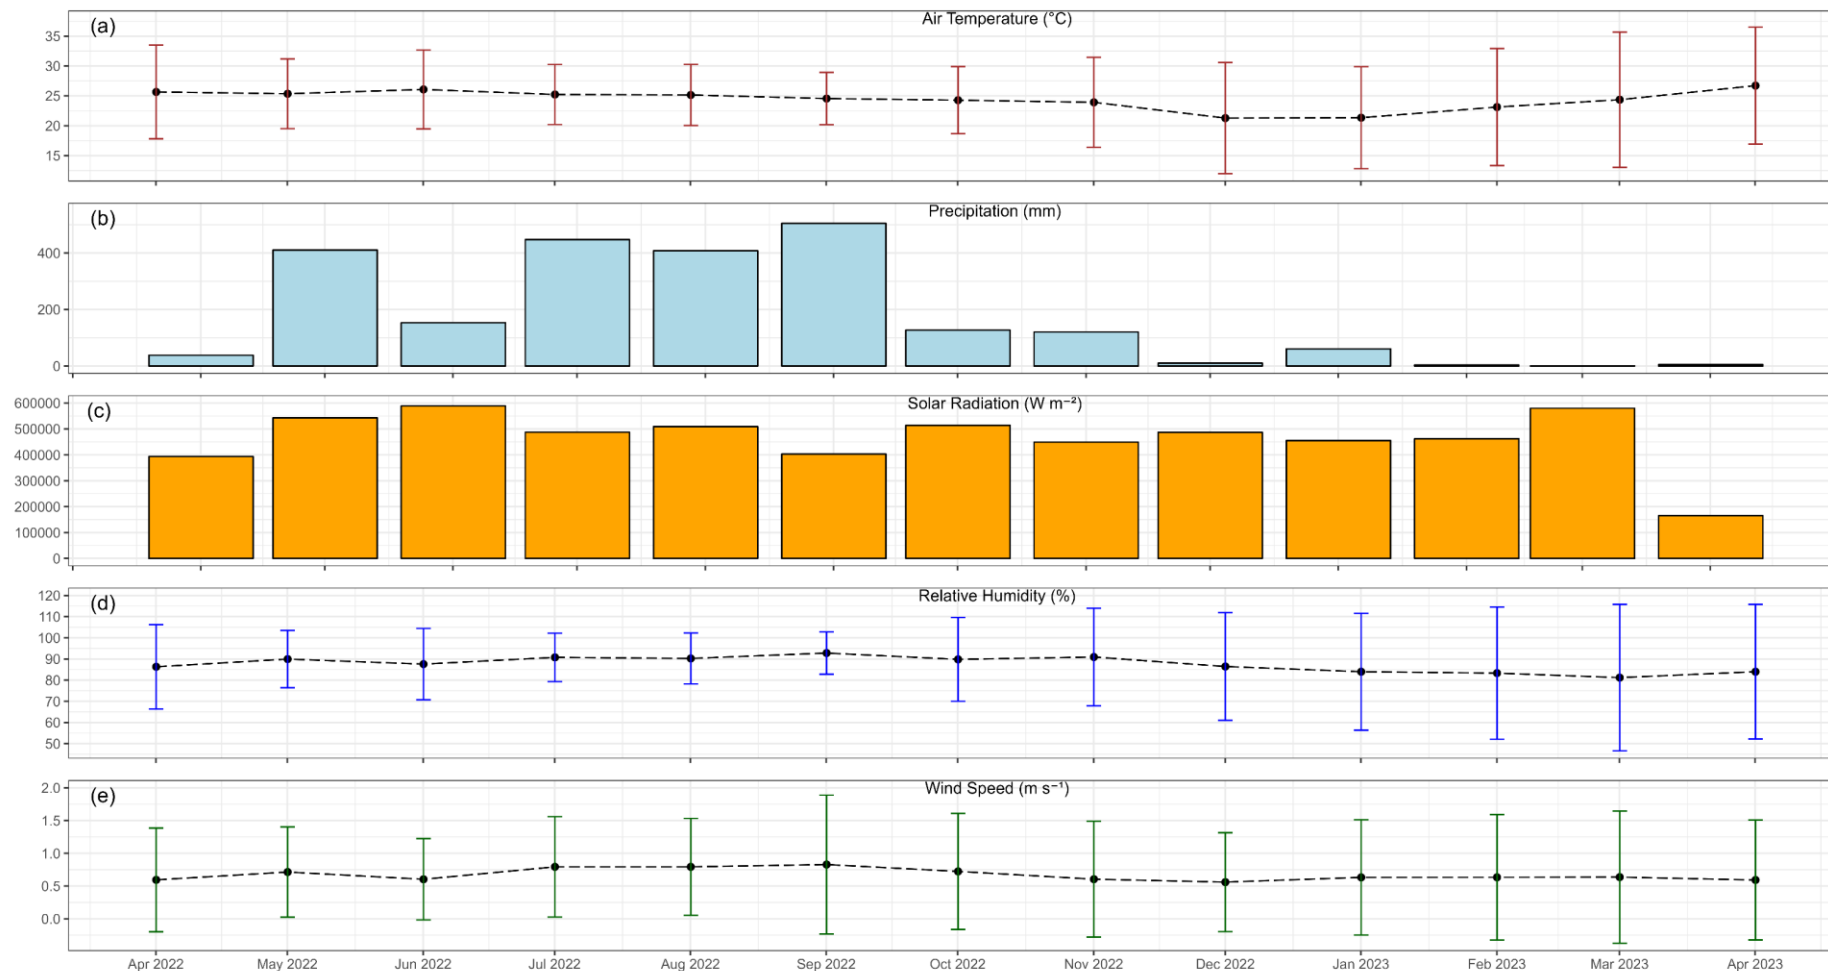

**Figure S2.2.** Monthly meteorological conditions at Kulen meteorological station from April 10, 2022, to April 9, 2023. (a) Monthly average air temperature ( $^{\circ}\text{C}$ ); (b) Monthly total precipitation (mm); (c) Monthly total global radiation ( $\text{W m}^{-2}$ ); (d) Monthly average relative humidity (%); (e) Monthly average wind speed ( $\text{m s}^{-1}$ ). The error bars in (a), (d), and (e) represent the 95% confidence interval (using standard deviation) from the monthly mean. The data were computed based on 15-minute timestep measurements.

### Subsection 3. Soil conditions in the forest inventory plots.

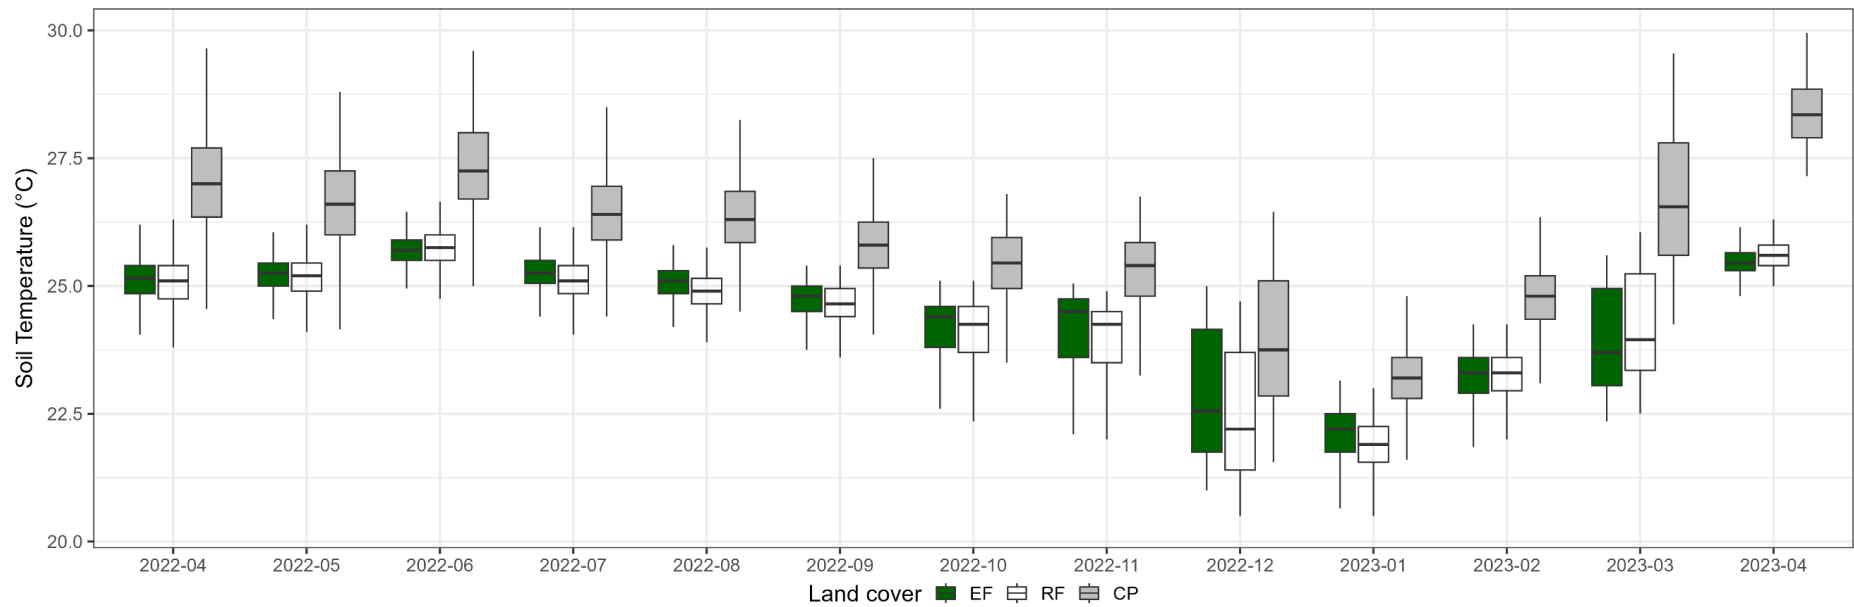

**Figure S3.1.** Monthly mean soil temperature (°C) for different land-cover classes from April 10, 2022, to April 9, 2023. The mean values were calculated by averaging the data from two representative plots for each land-cover class. Soil sensors were installed 0.2 m below the ground.

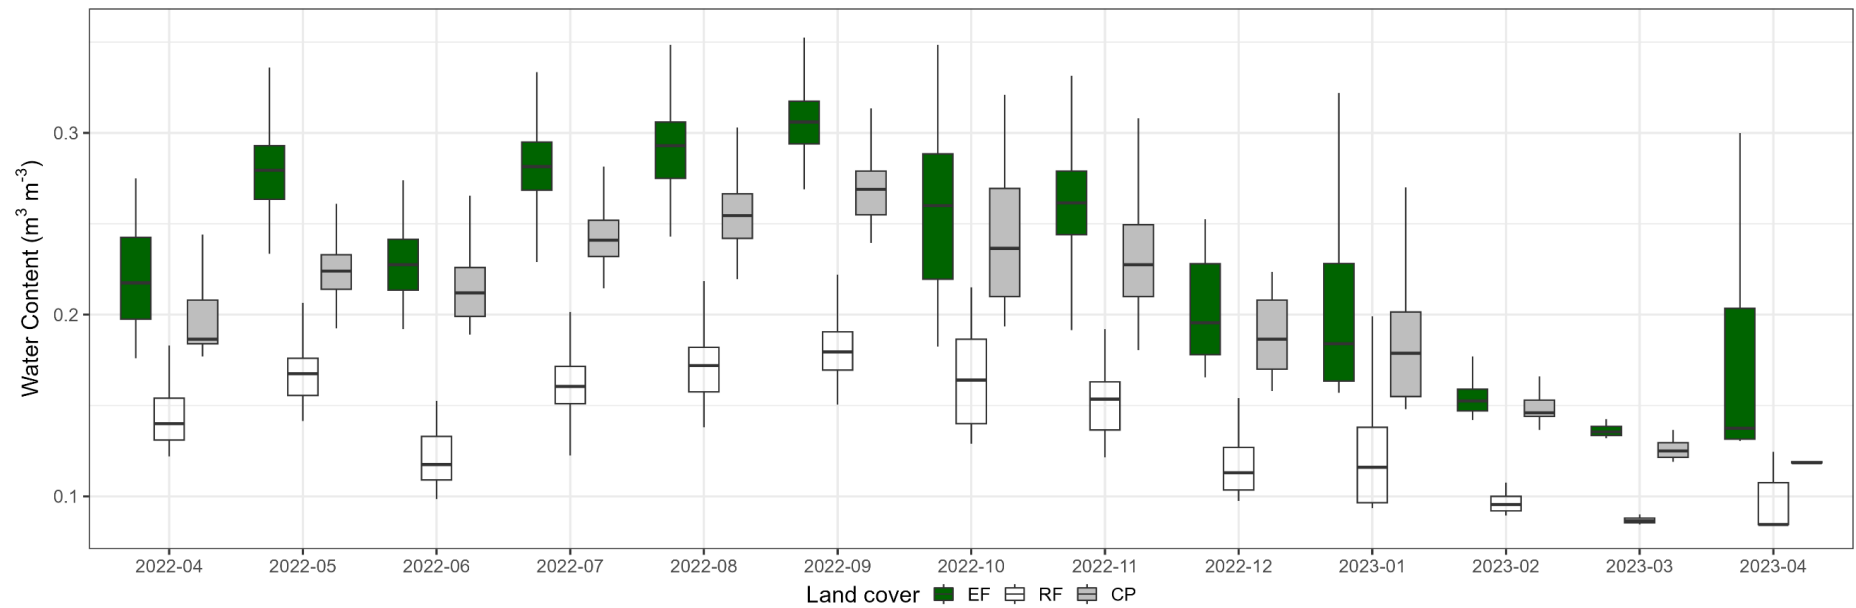

**Figure S3.2.** Monthly mean water content ( $\text{m}^3 \text{m}^{-3}$ ) for different land-cover classes from April 10, 2022, to April 9, 2023. The mean values were calculated by averaging the data from two representative plots for each land-cover class. Soil sensors were installed 0.2 m below the ground.

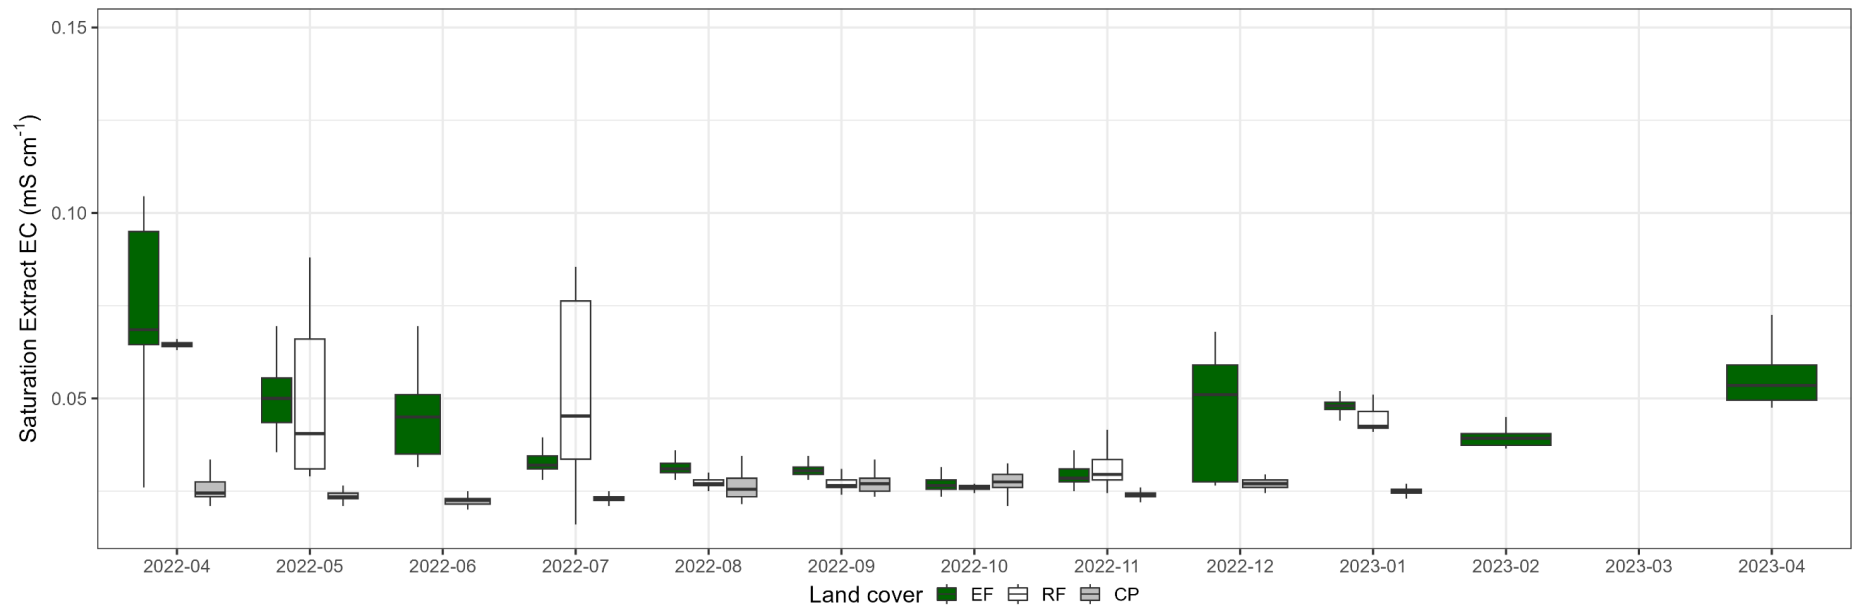

**Figure S3.3.** Monthly mean soil saturation extraction electrical conductivity ( $\text{mS cm}^{-1}$ ) for different land-cover classes from April 10, 2022, to April 9, 2023. The mean values were calculated by averaging the data from two representative plots for each land-cover class. Soil sensors were installed 0.2 m below the ground.



Subsection 4. Correlation matrix meteorological and soil conditions.

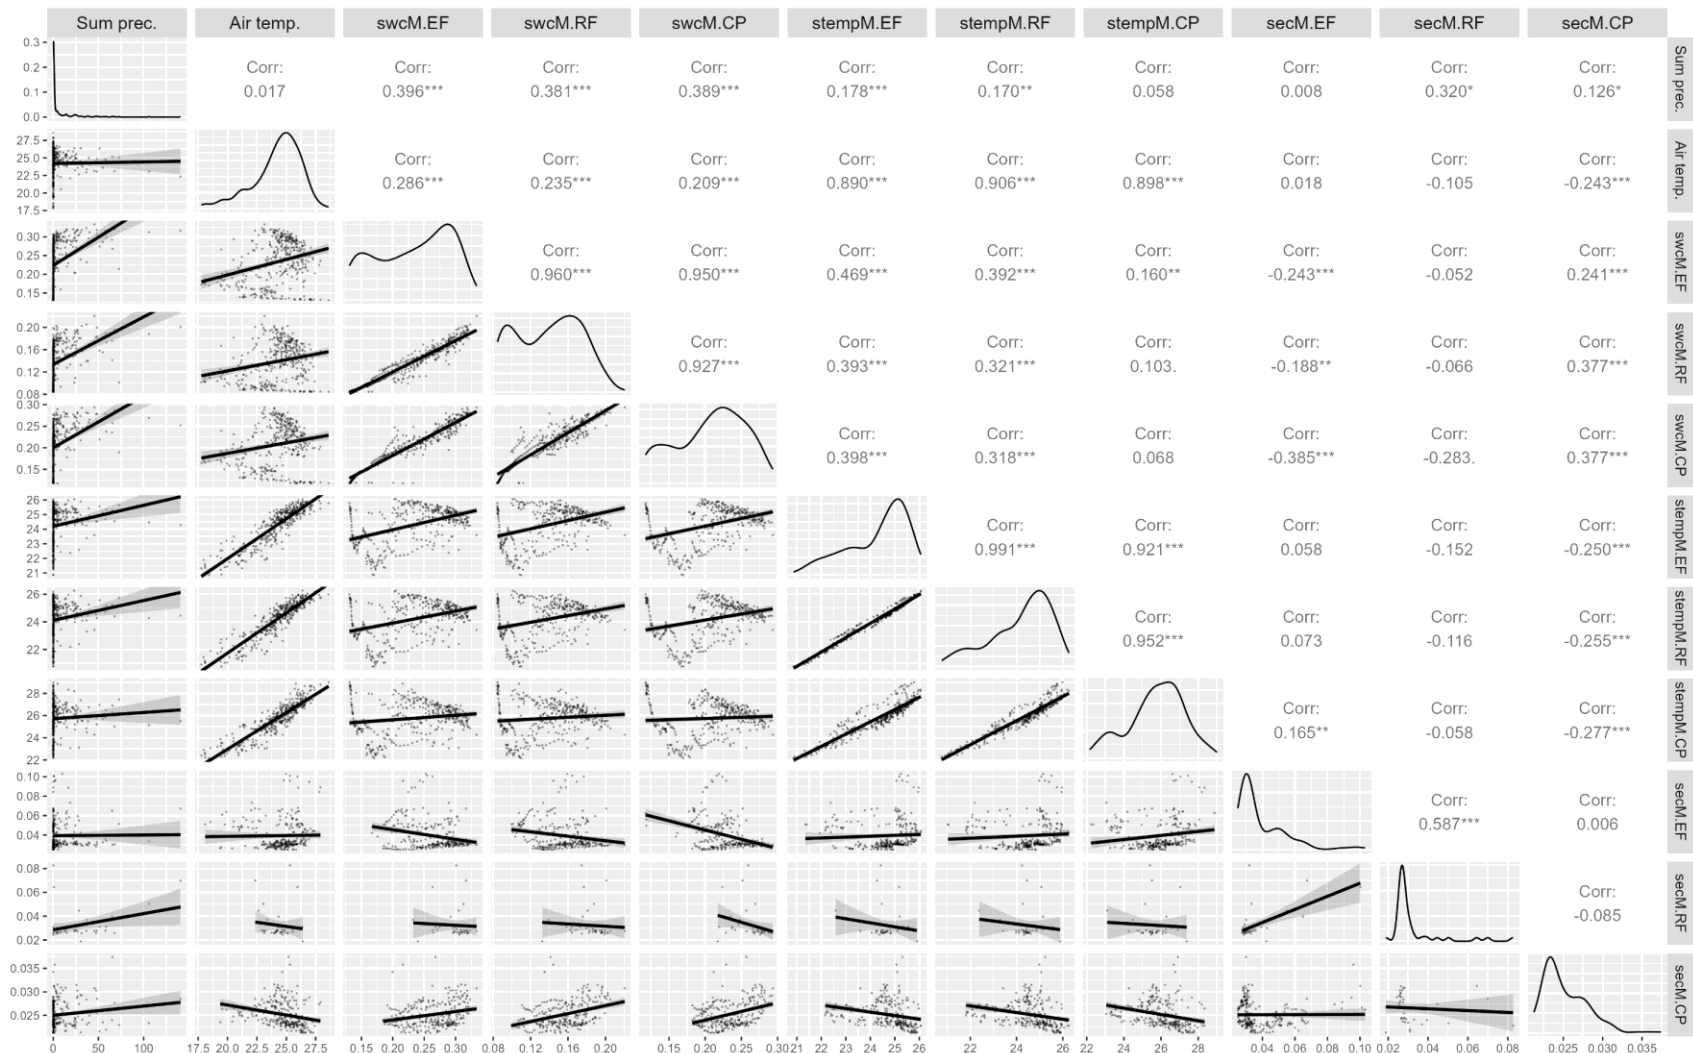

**Figure S4.1.** Correlation between daily sum precipitation (‘Sum prec.’; mm), daily mean air temperature (‘Air temp.’; °C), daily mean soil temperatures (‘stempM’; °C), daily mean soil water content (‘swcM’; m<sup>3</sup> m<sup>-3</sup>), daily mean soil saturation extraction electrical conductivity (‘secM’; mS cm<sup>-1</sup>) at Kulen from April 10, 2022, to April 9, 2023. The suffixes ‘EF’, ‘RF’, and ‘CP’ represent evergreen forests, regrowth forests, and cashew plantations. The precipitation and air temperature data were measured at Kulen’s meteorological station (see Fig. 1); meanwhile, the soil data were the average of two measured plots in each land-cover class.

## Subsection 5. Species diversity.

180 **Table S5.1.** Percentage of shared species among land-cover classes in the nine-forest inventory plot. The "Count" column indicates the total number of species observed in each land-cover class, whereas the "Sum" column indicates the total number of species recorded in each land-cover class. The "Shared%" column indicates the proportion of each species found in each land-cover class. Within each land-cover class, the "Cumulative Sum%" column displays the cumulative sum percentage, which accumulates from the highest to the lowest percentage of shared species.

| N  | Forest type      | Species                          | Family           | Count | Sum | Shared % | Cumulative sum % |
|----|------------------|----------------------------------|------------------|-------|-----|----------|------------------|
| 1  | Evergreen forest | Mesua ferrea                     | Calophyllaceae   | 18    | 136 | 13.24    | 13.24            |
| 2  | Evergreen forest | Diospyros bejaudii               | Ebenaceae        | 12    | 136 | 8.82     | 22.06            |
| 3  | Evergreen forest | Litchi chinensis                 | Sapindaceae      | 11    | 136 | 8.09     | 30.15            |
| 4  | Evergreen forest | Vatica odorata                   | Dipterocarpaceae | 11    | 136 | 8.09     | 38.24            |
| 5  | Evergreen forest | Hydnocarpus annamensis           | Achariaceae      | 8     | 136 | 5.88     | 44.12            |
| 6  | Evergreen forest | Memecylon acuminatum war. Tenuis | Melastomataceae  | 8     | 136 | 5.88     | 50.00            |
| 7  | Evergreen forest | Polyalthia cerasoides            | Annonaceae       | 7     | 136 | 5.15     | 55.15            |
| 8  | Evergreen forest | Homalium tomentosum              | Salicaceae       | 6     | 136 | 4.41     | 59.56            |
| 9  | Evergreen forest | Maclura cochinchinensis          | Moraceae         | 6     | 136 | 4.41     | 63.97            |
| 10 | Evergreen forest | Limonia acidissima               | Rutaceae         | 5     | 136 | 3.68     | 67.65            |
| 11 | Evergreen forest | Melodorum fruticosum             | Annonaceae       | 5     | 136 | 3.68     | 71.32            |
| 12 | Evergreen forest | Sandoricum indicum               | Meliaceae        | 5     | 136 | 3.68     | 75.00            |
| 13 | Evergreen forest | Nageia wallichiana               | Podocarpaceae    | 4     | 136 | 2.94     | 77.94            |
| 14 | Evergreen forest | Artocarpus chama                 | Moraceae         | 3     | 136 | 2.21     | 80.15            |
| 15 | Evergreen forest | Croton joufra                    | Euphorbiaceae    | 3     | 136 | 2.21     | 82.35            |
| 16 | Evergreen forest | Nephelium hypoleucum             | Sapindaceae      | 3     | 136 | 2.21     | 84.56            |
| 17 | Evergreen forest | Syzygium lineatum                | Myrtaceae        | 2     | 136 | 1.47     | 86.03            |
| 18 | Evergreen forest | Unknown_2                        | Unknown_2        | 2     | 136 | 1.47     | 87.50            |
| 19 | Evergreen forest | Agave sisalana                   | Asparagaceae     | 1     | 136 | 0.74     | 88.24            |
| 20 | Evergreen forest | Anamirta cocculus                | Menispermaceae   | 1     | 136 | 0.74     | 88.97            |
| 21 | Evergreen forest | Apostasia wallichii              | Orchidaceae      | 1     | 136 | 0.74     | 89.71            |
| 22 | Evergreen forest | Baccaurea ramiflora              | Phyllanthaceae   | 1     | 136 | 0.74     | 90.44            |
| 23 | Evergreen forest | Calamus viminalis                | Arecaceae        | 1     | 136 | 0.74     | 91.18            |
| 24 | Evergreen forest | Capparis micracantha             | Capparaceae      | 1     | 136 | 0.74     | 91.91            |
| 25 | Evergreen forest | Catunaregam tomentosa            | Rubiaceae        | 1     | 136 | 0.74     | 92.65            |
| 26 | Evergreen forest | Cyperus elatus                   | Cyperaceae       | 1     | 136 | 0.74     | 93.38            |
| 27 | Evergreen forest | Desmodium heterocarpon           | Fabaceae         | 1     | 136 | 0.74     | 94.12            |
| 28 | Evergreen forest | Dipterocarpus costatus           | Dipterocarpaceae | 1     | 136 | 0.74     | 94.85            |
| 29 | Evergreen forest | Garcinia oliveri                 | Clusiaceae       | 1     | 136 | 0.74     | 95.59            |
| 30 | Evergreen forest | Madhuca elliptica                | Sapotaceae       | 1     | 136 | 0.74     | 96.32            |
| 31 | Evergreen forest | Mitrephora vandaeflora           | Annonaceae       | 1     | 136 | 0.74     | 97.06            |
| 32 | Evergreen forest | Strychnos axillaris              | Loganiaceae      | 1     | 136 | 0.74     | 97.79            |
| 33 | Evergreen forest | Strychnos nux-vomica             | Loganiaceae      | 1     | 136 | 0.74     | 98.53            |

|    |                  |                                  |                  |    |     |       |        |
|----|------------------|----------------------------------|------------------|----|-----|-------|--------|
| 34 | Evergreen forest | Unknown_3                        | Unknown_3        | 1  | 136 | 0.74  | 99.26  |
| 35 | Evergreen forest | Xanthophyllum glaucum            | Polygalaceae     | 1  | 136 | 0.74  | 100.00 |
| 36 | Regrowth forest  | Vatica odorata                   | Dipterocarpaceae | 54 | 168 | 32.14 | 32.14  |
| 37 | Regrowth forest  | Nephelium hypoleucum             | Sapindaceae      | 14 | 168 | 8.33  | 40.48  |
| 38 | Regrowth forest  | Benkara fasciculata              | Rubiaceae        | 12 | 168 | 7.14  | 47.62  |
| 39 | Regrowth forest  | Garcinia oliveri                 | Clusiaceae       | 12 | 168 | 7.14  | 54.76  |
| 40 | Regrowth forest  | Unknown_4                        | Unknown_4        | 6  | 168 | 3.57  | 58.33  |
| 41 | Regrowth forest  | Capparis micracantha             | Capparaceae      | 5  | 168 | 2.98  | 61.31  |
| 42 | Regrowth forest  | Limonia acidissima               | Rutaceae         | 5  | 168 | 2.98  | 64.29  |
| 43 | Regrowth forest  | Mesua ferrea                     | Calophyllaceae   | 5  | 168 | 2.98  | 67.26  |
| 44 | Regrowth forest  | Pterospermum grewiifolium        | Malvaceae        | 5  | 168 | 2.98  | 70.24  |
| 45 | Regrowth forest  | Syzygium formosanum              | Myrtaceae        | 5  | 168 | 2.98  | 73.21  |
| 46 | Regrowth forest  | Melodorum fruticosum             | Annonaceae       | 4  | 168 | 2.38  | 75.60  |
| 47 | Regrowth forest  | Peltophorum dasyrrhachis         | Fabaceae         | 4  | 168 | 2.38  | 77.98  |
| 48 | Regrowth forest  | Polyalthia cerasoides            | Annonaceae       | 4  | 168 | 2.38  | 80.36  |
| 49 | Regrowth forest  | Maclura cochinchinensis          | Moraceae         | 3  | 168 | 1.79  | 82.14  |
| 50 | Regrowth forest  | Memecylon acuminatum war. Tenuis | Melastomataceae  | 3  | 168 | 1.79  | 83.93  |
| 51 | Regrowth forest  | Artocarpus chama                 | Moraceae         | 2  | 168 | 1.19  | 85.12  |
| 52 | Regrowth forest  | Dalbergia cochinchinensis        | Fabaceae         | 2  | 168 | 1.19  | 86.31  |
| 53 | Regrowth forest  | Diospyros bejardii               | Ebenaceae        | 2  | 168 | 1.19  | 87.50  |
| 54 | Regrowth forest  | Fagraea fragrans                 | Gentianaceae     | 2  | 168 | 1.19  | 88.69  |
| 55 | Regrowth forest  | Oroxylum indicum                 | Bignoniaceae     | 2  | 168 | 1.19  | 89.88  |
| 56 | Regrowth forest  | Psychotria revesii               | Rubiaceae        | 2  | 168 | 1.19  | 91.07  |
| 57 | Regrowth forest  | Terninalia catappa               | Combretaceae     | 2  | 168 | 1.19  | 92.26  |
| 58 | Regrowth forest  | Unknown_3                        | Unknown_3        | 2  | 168 | 1.19  | 93.45  |
| 59 | Regrowth forest  | Willughbeia edulis               | Apocynaceae      | 2  | 168 | 1.19  | 94.64  |
| 60 | Regrowth forest  | Apostasia wallichii              | Orchidaceae      | 1  | 168 | 0.60  | 95.24  |
| 61 | Regrowth forest  | Catunaregam tomentosa            | Rubiaceae        | 1  | 168 | 0.60  | 95.83  |
| 62 | Regrowth forest  | Dialium cochinchinense           | Fabaceae         | 1  | 168 | 0.60  | 96.43  |
| 63 | Regrowth forest  | Diospyros sp.                    | Ebenaceae        | 1  | 168 | 0.60  | 97.02  |
| 64 | Regrowth forest  | Diospyros undulata               | Ebenaceae        | 1  | 168 | 0.60  | 97.62  |
| 65 | Regrowth forest  | Madhuca elliptica                | Sapotaceae       | 1  | 168 | 0.60  | 98.21  |
| 66 | Regrowth forest  | Milusa mollis                    | Annonaceae       | 1  | 168 | 0.60  | 98.81  |
| 67 | Regrowth forest  | Unknown_2                        | Unknown_2        | 1  | 168 | 0.60  | 99.40  |
| 68 | Regrowth forest  | Unknown_5                        | Unknown_5        | 1  | 168 | 0.60  | 100.00 |
| 69 | Plantation       | Anacardium occidentale           | Anacardiaceae    | 46 | 63  | 73.02 | 73.02  |
| 70 | Plantation       | Strychnos axillaris              | Loganiaceae      | 3  | 63  | 4.76  | 77.78  |
| 71 | Plantation       | Euphorbia hirta                  | Euphorbiaceae    | 2  | 63  | 3.17  | 80.95  |
| 72 | Plantation       | Scleria levis                    | Cyperaceae       | 2  | 63  | 3.17  | 84.13  |
| 73 | Plantation       | Catunaregam tomentosa            | Rubiaceae        | 1  | 63  | 1.59  | 85.71  |
| 74 | Plantation       | Diospyros bejardii               | Ebenaceae        | 1  | 63  | 1.59  | 87.30  |
| 75 | Plantation       | Echinochloa crus-galli           | Poaceae          | 1  | 63  | 1.59  | 88.89  |
| 76 | Plantation       | Gardenia philastreii             | Rubiaceae        | 1  | 63  | 1.59  | 90.48  |

185

|    |            |                         |             |   |    |      |        |
|----|------------|-------------------------|-------------|---|----|------|--------|
| 77 | Plantation | Heterosmilax paniculata | Smilacaceae | 1 | 63 | 1.59 | 92.06  |
| 78 | Plantation | Imperata cylindrica     | Poaceae     | 1 | 63 | 1.59 | 93.65  |
| 79 | Plantation | Maclura cochinchinensis | Moraceae    | 1 | 63 | 1.59 | 95.24  |
| 80 | Plantation | Melodorum fruticosum    | Annonaceae  | 1 | 63 | 1.59 | 96.83  |
| 81 | Plantation | Nephelium hypoleucum    | Sapindaceae | 1 | 63 | 1.59 | 98.41  |
| 82 | Plantation | Unknown_1               | Unknown_1   | 1 | 63 | 1.59 | 100.00 |

**Table S5.2.** Species richness ( $S_R$ ) and Shannon-Wiener index ( $S_H$ ) across nine forest inventory plots in Kulen, Cambodia.

| N. | Forest type      | Plot ID | $S_R$ (included seedling species) | $S_R$ (excluded seedling species) | $S_H$ |
|----|------------------|---------|-----------------------------------|-----------------------------------|-------|
| 1  | Plantation       | CP1     | 8                                 | 1                                 | 1.14  |
| 2  | Plantation       | CP2     | 2                                 | 1                                 | 0.31  |
| 3  | Plantation       | CP3     | 3                                 | 1                                 | 0.39  |
| 4  | Evergreen forest | EF1     | 20                                | 15                                | 2.68  |
| 5  | Evergreen forest | EF2     | 18                                | 14                                | 2.66  |
| 6  | Evergreen forest | EF3     | 12                                | 11                                | 2.11  |
| 7  | Regrowth forest  | RF1     | 12                                | 9                                 | 2.11  |
| 8  | Regrowth forest  | RF2     | 16                                | 13                                | 2.33  |
| 9  | Regrowth forest  | RF3     | 12                                | 8                                 | 1.47  |

190

## Subsection 6. Functional diversity of different land covers and plots.

**Table S6.1.** Summary of the leaf traits, including leaf dry weight, leaf area, leaf length, specific leaf area (*SLA*, m<sup>2</sup> kg<sup>-1</sup>), chlorophyll a and b content (*Chl*, mg g<sup>-1</sup>), and leaf dry matter content (*LDMC*, mg g<sup>-1</sup>), obtained from 30 plant woody species found in the Kulen inventory list. The table displays the number of species collected (n), the mean value, standard deviation (SD.), median, minimum (min.), and maximum (max.) value for each trait.

| Statistics | Leaf dry weight (g) | Leaf length (cm) | Leaf area (cm <sup>2</sup> ) | <i>SLA</i> (m <sup>2</sup> kg <sup>-1</sup> ) | <i>Chl</i> (mg g <sup>-1</sup> ) | <i>LDMC</i> (mg g <sup>-1</sup> ) |
|------------|---------------------|------------------|------------------------------|-----------------------------------------------|----------------------------------|-----------------------------------|
| n          | 30                  | 30               | 30                           | 30                                            | 30                               | 30                                |
| Mean       | 0.52                | 16.51            | 80.96                        | 16.97                                         | 10.28                            | 378.96                            |
| SD         | 0.34                | 5.29             | 52.64                        | 5.30                                          | 4.17                             | 143.26                            |
| Min        | 0.06                | 5.46             | 10.66                        | 10.46                                         | 4.86                             | 139.92                            |
| Max        | 1.36                | 29.13            | 207.41                       | 36.67                                         | 25.75                            | 1000.00                           |

**Table S6.2.** The mean and standard deviation values (SD) of leaf chlorophyll content (SPAD-value), leaf fresh weight (g), leaf dry weight (g), leaf length area (cm), leaf area (cm<sup>2</sup>), specific leaf area (*SLA*, m<sup>2</sup> kg<sup>-1</sup>), chlorophyll a and b content (*Chl*, mg g<sup>-1</sup>), and leaf dry matter content (*LDMC*, mg g<sup>-1</sup>) by species. The data included all 30 plant woody species from inventory data species which was used to compute the community weighted mean for *SLA*, *Chl* and *LDMC*. 'n' is the total number of sample leaves per species. \* Standard deviation values include both the standard deviation of five-time measurements per leaf and the standard deviation of the total number of leaves sampled per species.

| N. | Species                   | n  | <i>Chl</i> (SPAD) |      | Fresh weight (g) |      | Dry weight (g) |      | Leaf length (cm) |      | Leaf area (cm <sup>2</sup> ) |       | <i>SLA</i> (m <sup>2</sup> kg <sup>-1</sup> ) |       | <i>Chl</i> (mg g <sup>-1</sup> ) |      | <i>LDMC</i> (mg g <sup>-1</sup> ) |        |
|----|---------------------------|----|-------------------|------|------------------|------|----------------|------|------------------|------|------------------------------|-------|-----------------------------------------------|-------|----------------------------------|------|-----------------------------------|--------|
|    |                           |    | Mean              | SD*  | Mean             | SD   | Mean           | SD   | Mean             | SD   | Mean                         | SD    | Mean                                          | SD    | Mean                             | SD   | Mean                              | SD     |
| 1  | Anacardium occidentale    | 41 | 39.90             | 8.92 | 2.30             | 0.47 | 0.98           | 0.93 | 14.40            | 3.14 | 87.68                        | 35.39 | 11.24                                         | 11.66 | 4.86                             | 4.93 | 418.74                            | 85.40  |
| 2  | Artocarpus chama          | 7  | 53.18             | 1.44 | 3.37             | 0.58 | 1.18           | 1.67 | 24.26            | 6.10 | 205.30                       | 91.55 | 17.80                                         | 1.19  | 11.59                            | 0.89 | 349.38                            | 5.67   |
| 3  | Benkara fasciculata       | 6  | 49.85             | 3.95 | 0.84             | 0.03 | 0.26           | 0.11 | 13.15            | 1.40 | 43.01                        | 7.28  | 16.88                                         | 3.25  | 9.81                             | 1.05 | 307.68                            | 42.01  |
| 4  | Capparis micracantha      | 7  | 67.28             | 5.36 | 2.27             | 0.58 | 1.00           | 1.33 | 21.38            | 6.37 | 99.46                        | 53.04 | 10.46                                         | 3.28  | 10.24                            | 4.03 | 466.84                            | 106.60 |
| 5  | Catunaregam tomentosa     | 6  | 43.10             | 1.86 | 0.94             | 0.13 | 0.38           | 0.31 | 13.40            | 1.80 | 52.36                        | 11.39 | 14.20                                         | 2.16  | 6.77                             | 1.02 | 408.44                            | 37.96  |
| 6  | Croton joufra             | 11 | 57.24             | 7.32 | 5.69             | 0.28 | 1.36           | 2.08 | 29.13            | 7.37 | 207.41                       | 70.31 | 15.12                                         | 3.55  | 10.90                            | 1.97 | 253.77                            | 50.08  |
| 7  | Dalbergia cochinchinensis | 6  | 53.60             | 1.46 | 0.18             | 0.01 | 0.06           | 0.03 | 5.46             | 0.55 | 10.66                        | 1.43  | 16.91                                         | 1.84  | 11.14                            | 1.21 | 361.10                            | 35.60  |
| 8  | Diospyros bejaudii        | 31 | 49.76             | 2.69 | 1.57             | 0.22 | 0.64           | 0.59 | 17.47            | 2.14 | 85.60                        | 23.29 | 13.98                                         | 2.41  | 8.28                             | 2.37 | 413.86                            | 50.61  |
| 9  | Diospyros undulata        | 6  | 68.08             | 4.46 | 1.29             | 0.17 | 0.46           | 0.30 | 18.67            | 1.72 | 73.16                        | 14.03 | 16.59                                         | 2.59  | 16.42                            | 3.25 | 349.97                            | 44.30  |
| 10 | Dipterocarpus costatus    | 6  | 53.81             | 2.49 | 1.88             | 0.40 | 0.84           | 0.78 | 21.38            | 3.41 | 140.34                       | 60.04 | 17.25                                         | 2.90  | 11.32                            | 0.98 | 438.84                            | 44.24  |
| 11 | Fagraea fragrans          | 6  | 55.54             | 2.50 | 1.10             | 0.06 | 0.26           | 0.14 | 12.65            | 0.95 | 44.06                        | 3.66  | 17.46                                         | 3.48  | 12.07                            | 1.72 | 234.69                            | 27.28  |
| 12 | Garcinia oliveri          | 22 | 50.61             | 2.46 | 2.70             | 0.28 | 0.55           | 1.36 | 17.57            | 5.09 | 85.01                        | 39.81 | 15.95                                         | 2.74  | 9.71                             | 2.95 | 206.89                            | 36.16  |
| 13 | Homalium tomentosum       | 11 | 52.31             | 1.44 | 0.58             | 0.06 | 0.20           | 0.17 | 13.71            | 2.60 | 50.63                        | 13.77 | 25.05                                         | 1.82  | 16.05                            | 3.51 | 351.46                            | 18.33  |
| 14 | Hydnocarpus annamensis    | 7  | 55.55             | 1.91 | 1.90             | 0.06 | 0.26           | 0.44 | 20.50            | 2.01 | 95.23                        | 19.94 | 36.67                                         | 5.20  | 25.75                            | 5.28 | 139.92                            | 20.19  |
| 15 | Limonia acidissima        | 10 | 49.50             | 2.25 | 2.46             | 0.51 | 1.03           | 1.37 | 23.14            | 2.32 | 120.12                       | 51.84 | 12.12                                         | 2.17  | 7.02                             | 0.90 | 433.31                            | 60.40  |
| 16 | Litchi chinensis          | 22 | 36.56             | 1.63 | 1.09             | 0.15 | 0.39           | 0.30 | 16.70            | 2.62 | 65.26                        | 17.63 | 18.64                                         | 5.44  | 6.79                             | 4.00 | 351.61                            | 95.93  |
| 17 | Maclura cochinchinensis   | 5  | 51.44             | 5.62 | 0.51             | 0.03 | 0.17           | 0.10 | 10.17            | 0.53 | 22.75                        | 4.47  | 13.18                                         | 2.31  | 8.13                             | 1.67 | 348.52                            | 62.06  |



|    |                                  |    |       |      |      |      |      |      |       |       |        |        |       |       |       |       |         |        |
|----|----------------------------------|----|-------|------|------|------|------|------|-------|-------|--------|--------|-------|-------|-------|-------|---------|--------|
| 18 | Melodorum fruticosum             | 41 | 53.46 | 3.84 | 0.46 | 0.07 | 0.20 | 0.12 | 11.83 | 2.42  | 30.93  | 6.26   | 16.19 | 3.87  | 10.85 | 3.82  | 433.44  | 66.60  |
| 19 | Memecylon acuminatum war. Tenuis | 12 | 54.66 | 2.15 | 0.97 | 0.07 | 0.36 | 0.19 | 12.44 | 1.52  | 42.90  | 9.86   | 11.99 | 1.67  | 8.10  | 1.11  | 369.01  | 35.35  |
| 20 | Mesua ferrea                     | 12 | 49.79 | 1.44 | 0.77 | 0.08 | 0.38 | 0.14 | 16.39 | 1.78  | 53.86  | 6.98   | 14.70 | 2.49  | 8.70  | 1.81  | 486.90  | 25.03  |
| 21 | Nageia wallichiana               | 7  | 52.94 | 3.60 | 2.58 | 0.46 | 0.85 | 1.04 | 25.10 | 5.15  | 162.10 | 57.70  | 26.24 | 24.27 | 16.21 | 13.30 | 339.01  | 118.87 |
| 22 | Nephelium hypoleucum             | 47 | 44.86 | 4.66 | 1.09 | 0.15 | 0.52 | 0.30 | 17.68 | 2.31  | 75.35  | 18.66  | 14.88 | 3.66  | 7.42  | 1.86  | 479.23  | 44.06  |
| 23 | Oroxylum indicum                 | 33 | 44.32 | 4.02 | 1.48 | 0.20 | 0.52 | 0.91 | 17.13 | 3.01  | 81.28  | 31.30  | 15.67 | 3.77  | 8.28  | 5.37  | 393.85  | 87.75  |
| 24 | Peltophorum dasyrrhachis         | 8  | 38.06 | 5.91 | 0.45 | 0.04 | 0.16 | 0.12 | 8.78  | 1.95  | 24.72  | 6.99   | 15.68 | 1.46  | 6.32  | 1.25  | 354.31  | 35.66  |
| 25 | Polyalthia cerasoides            | 6  | 53.08 | 2.12 | 0.80 | 0.04 | 0.30 | 0.11 | 14.38 | 1.76  | 54.51  | 9.87   | 18.45 | 2.45  | 11.94 | 1.47  | 368.80  | 21.78  |
| 26 | Pterospermum grewiifolium        | 7  | 49.77 | 8.59 | 0.30 | 0.13 | 0.30 | 0.13 | 11.65 | 2.88  | 39.04  | 16.02  | 13.06 | 1.49  | 7.66  | 0.66  | 1000.00 | 0.00   |
| 27 | Sandoricum indicum               | 20 | 48.03 | 3.54 | 1.85 | 0.20 | 0.43 | 0.68 | 16.68 | 3.11  | 96.25  | 37.23  | 24.52 | 7.76  | 13.46 | 3.85  | 226.84  | 30.43  |
| 28 | Syzygium lineatum                | 7  | 48.16 | 1.98 | 0.36 | 0.05 | 0.15 | 0.12 | 10.97 | 1.26  | 20.64  | 6.21   | 14.31 | 1.09  | 8.01  | 0.84  | 407.93  | 19.94  |
| 29 | Terninalia catappa               | 16 | 35.18 | 2.12 | 3.64 | 0.73 | 0.90 | 3.40 | 22.43 | 10.06 | 177.10 | 143.60 | 19.80 | 3.27  | 7.11  | 1.71  | 292.53  | 89.40  |
| 30 | Vatica odorata                   | 27 | 46.08 | 2.27 | 1.66 | 0.30 | 0.62 | 0.75 | 16.77 | 3.52  | 81.99  | 29.15  | 14.11 | 3.05  | 7.53  | 2.59  | 382.09  | 65.49  |

**Table S6.3.** The values of specific leaf area (*SLA*, m<sup>2</sup> kg<sup>-1</sup>), chlorophyll a and b content (*Chl*, mg g<sup>-1</sup>), and leaf dry matter content (*LDMC*, mg g<sup>-1</sup>) by species and inventory plots. The samples were collected from cashew plantations (CP), regrowth forests (RF), evergreen forests (EF), and the areas within 500 m of EF and RF plots (EF123 and RF123). In the *SLA*, *Chl*, and *LDMC* columns, ‘n’ = the number of leaf samples, ‘Mean’ = the mean value, and ‘SD’ = the standard deviation value.

| N. | n.<br>Species | Species name              | Plot ID | Land cover | <i>SLA</i> (m <sup>2</sup> kg <sup>-1</sup> ) |       |       | <i>Chl</i> (mg g <sup>-1</sup> ) |       |      | <i>LDMC</i> (mg g <sup>-1</sup> ) |        |       |
|----|---------------|---------------------------|---------|------------|-----------------------------------------------|-------|-------|----------------------------------|-------|------|-----------------------------------|--------|-------|
|    |               |                           |         |            | n                                             | Mean  | SD    | n                                | Mean  | SD   | n                                 | Mean   | SD    |
| 1  | 1             | Anacardium occidentale    | CP3     | CP         | 5                                             | 13.57 | 0.59  | 5                                | 5.64  | 0.67 | 5                                 | 418.74 | -     |
| 2  |               | Anacardium occidentale    | CP2     | CP         | 31                                            | 11.00 | 13.41 | 31                               | 4.86  | 5.67 | 31                                | 425.96 | 96.17 |
| 3  |               | Anacardium occidentale    | CP1     | CP         | 5                                             | 10.41 | 1.64  | 5                                | 4.09  | 0.69 | 5                                 | 373.98 | 25.55 |
| 4  | 2             | Artocarpus chama          | RF123   | RF         | 7                                             | 17.80 | 1.19  | 7                                | 11.59 | 0.89 | 7                                 | 349.38 | 5.67  |
| 5  | 3             | Benkara fasciculata       | RF123   | RF         | 6                                             | 16.88 | 3.25  | 6                                | 9.81  | 1.05 | 6                                 | 307.68 | 42.01 |
| 6  | 4             | Capparis micracantha      | RF123   | RF         | 7                                             | 10.46 | 3.28  | 7                                | 10.24 | 4.03 | 7                                 | 466.84 | 106.6 |
| 7  | 5             | Catunaregam tomentosa     | RF123   | RF         | 6                                             | 14.2  | 2.16  | 6                                | 6.77  | 1.02 | 6                                 | 408.44 | 37.96 |
| 8  | 6             | Croton joufra             | EF123   | EF         | 6                                             | 17.75 | 2.61  | 6                                | 11.92 | 1.97 | 6                                 | 216.06 | 34.33 |
| 9  |               | Croton joufra             | RF1     | RF         | 5                                             | 11.97 | 0.38  | 5                                | 9.67  | 1.18 | 5                                 | 299.02 | 10.19 |
| 10 | 7             | Dalbergia cochinchinensis | RF123   | RF         | 6                                             | 16.91 | 1.84  | 6                                | 11.14 | 1.21 | 6                                 | 361.10 | 35.60 |
| 11 | 8             | Diospyros bejaudii        | CP3     | CP         | 5                                             | 16.55 | 0.67  | 5                                | 6.92  | 0.50 | 5                                 | 343.45 | 13.95 |
| 12 |               | Diospyros bejaudii        | CP1     | CP         | 5                                             | 13.26 | 0.83  | 5                                | 5.59  | 0.59 | 5                                 | 399.38 | 12.20 |
| 13 |               | Diospyros bejaudii        | EF123   | EF         | 6                                             | 12.06 | 2.01  | 6                                | 10.14 | 1.80 | 6                                 | 381.04 | 30.08 |
| 14 |               | Diospyros bejaudii        | EF1     | EF         | 5                                             | 15.41 | 2.35  | 5                                | 11.99 | 0.82 | 5                                 | 439.67 | 33.15 |
| 15 |               | Diospyros bejaudii        | EF3     | EF         | 5                                             | 15.48 | 1.91  | 5                                | 7.17  | 0.49 | 5                                 | 464.02 | 40.13 |
| 16 |               | Diospyros bejaudii        | RF2     | RF         | 5                                             | 11.51 | 0.81  | 5                                | 7.51  | 0.78 | 5                                 | 462.16 | 7.51  |
| 17 |               | Diospyros undulata        | RF123   | RF         | 6                                             | 16.59 | 2.59  | 6                                | 16.42 | 3.25 | 6                                 | 349.97 | 44.30 |
| 18 | 9             | Dipterocarpus costatus    | EF123   | EF         | 6                                             | 17.25 | 2.9   | 6                                | 11.32 | 0.98 | 6                                 | 438.84 | 44.24 |
| 19 | 10            | Fagraea fragrans          | RF123   | RF         | 6                                             | 17.46 | 3.48  | 6                                | 12.07 | 1.72 | 6                                 | 234.69 | 27.28 |
| 20 | 11            | Garcinia oliveri          | EF123   | EF         | 6                                             | 16.81 | 3.11  | 6                                | 14.09 | 1.35 | 6                                 | 200.37 | 30.13 |

|    |    |                                  |       |    |    |       |       |    |       |       |    |         |        |
|----|----|----------------------------------|-------|----|----|-------|-------|----|-------|-------|----|---------|--------|
| 21 |    | Garcinia oliveri                 | EF2   | EF | 6  | 15.68 | 2.88  | 6  | 7.23  | 0.98  | 6  | 195.56  | 45.47  |
| 22 |    | Garcinia oliveri                 | RF3   | RF | 5  | 13.22 | 0.83  | 5  | 8.7   | 0.84  | 5  | 249.73  | 3.73   |
| 23 |    | Garcinia oliveri                 | RF2   | RF | 5  | 17.97 | 0.88  | 5  | 8.43  | 0.48  | 5  | 185.48  | 2.97   |
| 24 | 12 | Grewia eriocarpa                 | CP3   | CP | 5  | 21.31 | 1.55  | 5  | 8.65  | 1.10  | 5  | 434.07  | 16.09  |
| 25 |    | Grewia eriocarpa                 | CP1   | CP | 5  | 21.29 | 3.53  | 5  | 8.03  | 3.11  | 5  | 350.33  | 56.80  |
| 26 | 13 | Homalium tomentosum              | EF123 | EF | 6  | 23.94 | 1.72  | 6  | 19.01 | 0.95  | 6  | 353.50  | 25.47  |
| 27 |    | Homalium tomentosum              | EF3   | EF | 5  | 26.37 | 0.74  | 5  | 12.49 | 0.80  | 5  | 349.00  | 3.92   |
| 28 | 14 | Hydnocarpus annamensis           | EF123 | EF | 7  | 36.67 | 5.20  | 7  | 25.75 | 5.28  | 7  | 139.92  | 20.19  |
| 29 | 15 | Limonia acidissima               | EF123 | EF | 5  | 12.47 | 3.18  | 5  | 7.51  | 1.04  | 5  | 387.64  | 53.86  |
| 30 |    | Limonia acidissima               | RF1   | RF | 5  | 11.76 | 0.46  | 5  | 6.53  | 0.34  | 5  | 478.99  | 9.62   |
| 31 | 16 | Litchi chinensis                 | EF123 | EF | 6  | 16.66 | 1.57  | 6  | 11.38 | 0.98  | 6  | 403.99  | 23.37  |
| 32 |    | Litchi chinensis                 | EF2   | EF | 11 | 18.99 | 7.46  | 11 | 4.82  | 3.93  | 11 | 329.54  | 128.98 |
| 33 |    | Litchi chinensis                 | EF3   | EF | 5  | 20.24 | 1.92  | 5  | 5.61  | 0.33  | 5  | 337.30  | 18.28  |
| 34 | 17 | Maclura cochinchinensis          | EF123 | EF | 5  | 13.18 | 2.31  | 5  | 8.13  | 1.67  | 5  | 348.52  | 62.06  |
| 35 | 18 | Melodorum fruticosum             | CP2   | CP | 6  | 11.43 | 0.45  | 6  | 8.34  | 0.59  | 6  | 515.98  | 34.46  |
| 36 |    | Melodorum fruticosum             | CP1   | CP | 5  | 18.33 | 0.83  | 5  | 9.83  | 0.99  | 5  | 395.68  | 22.36  |
| 37 |    | Melodorum fruticosum             | EF123 | EF | 7  | 22.10 | 4.34  | 7  | 18.51 | 1.37  | 7  | 340.58  | 48.96  |
| 38 |    | Melodorum fruticosum             | EF1   | EF | 5  | 16.13 | 1.00  | 5  | 11.09 | 0.51  | 5  | 484.77  | 17.11  |
| 39 |    | Melodorum fruticosum             | RF3   | RF | 5  | 15.52 | 0.47  | 5  | 10.99 | 0.57  | 5  | 453.48  | 13.36  |
| 40 |    | Melodorum fruticosum             | RF2   | RF | 5  | 15.54 | 0.99  | 5  | 7.99  | 0.71  | 5  | 429.33  | 22.99  |
| 41 |    | Melodorum fruticosum             | RF1   | RF | 8  | 14.10 | 2.06  | 8  | 8.21  | 1.36  | 8  | 434.35  | 62.65  |
| 42 | 19 | Memecylon acuminatum war. Tenuis | EF123 | EF | 6  | 10.95 | 1.11  | 6  | 7.93  | 0.72  | 6  | 395.39  | 14.90  |
| 43 |    | Memecylon acuminatum war. Tenuis | RF123 | RF | 6  | 13.04 | 1.50  | 6  | 8.27  | 1.46  | 6  | 342.62  | 29.26  |
| 44 | 20 | Mesua ferrea                     | EF123 | EF | 6  | 16.88 | 0.83  | 6  | 10.32 | 0.65  | 6  | 469.12  | 22.85  |
| 45 |    | Mesua ferrea                     | RF123 | RF | 6  | 12.52 | 1.27  | 6  | 7.09  | 0.73  | 6  | 504.67  | 9.88   |
| 46 | 21 | Nageia wallichiana               | EF123 | EF | 7  | 26.24 | 24.27 | 7  | 16.21 | 13.3  | 7  | 339.01  | 118.87 |
| 47 | 22 | Nephelium hypoleucum             | CP3   | CP | 5  | 18.41 | 0.38  | 5  | 5.12  | 0.34  | 5  | 411.34  | 11.67  |
| 48 |    | Nephelium hypoleucum             | CP1   | CP | 5  | 19.98 | 7.96  | 5  | 5.46  | 2.91  | 5  | 430.97  | 15.52  |
| 49 |    | Nephelium hypoleucum             | EF123 | EF | 6  | 11.27 | 0.41  | 6  | 7.38  | 0.59  | 6  | 428.69  | 14.52  |
| 50 |    | Nephelium hypoleucum             | EF1   | EF | 5  | 16.17 | 0.44  | 5  | 9.5   | 0.19  | 5  | 482.58  | 10.55  |
| 51 |    | Nephelium hypoleucum             | EF2   | EF | 7  | 13.90 | 0.30  | 7  | 9.28  | 0.18  | 7  | 526.93  | 10.77  |
| 52 |    | Nephelium hypoleucum             | RF3   | RF | 5  | 15.74 | 0.35  | 5  | 7.15  | 0.44  | 5  | 513.55  | 6.59   |
| 53 |    | Nephelium hypoleucum             | RF2   | RF | 5  | 12.87 | 0.63  | 5  | 6.11  | 0.51  | 5  | 513.43  | 13.64  |
| 54 |    | Nephelium hypoleucum             | RF1   | RF | 9  | 13.19 | 1.68  | 9  | 8.09  | 1.44  | 9  | 500.44  | 19.05  |
| 55 | 23 | Oroxylum indicum                 | CP3   | CP | 5  | 15.49 | 0.95  | 5  | 8.60  | 0.21  | 5  | 374.16  | 8.49   |
| 56 |    | Oroxylum indicum                 | EF3   | EF | 5  | 16.67 | 2.03  | 5  | 7.98  | 0.35  | 5  | 445.55  | 37.63  |
| 57 |    | Oroxylum indicum                 | RF123 | RF | 6  | 17.96 | 8.59  | 6  | 14.85 | 10.57 | 6  | 243.30  | 71.14  |
| 58 |    | Oroxylum indicum                 | RF3   | RF | 5  | 15.63 | 0.44  | 5  | 7.03  | 0.50  | 5  | 453.21  | 25.47  |
| 59 |    | Oroxylum indicum                 | RF2   | RF | 5  | 14.22 | 0.60  | 5  | 5.62  | 0.23  | 5  | 440.95  | 6.76   |
| 60 |    | Oroxylum indicum                 | RF1   | RF | 7  | 14.18 | 0.41  | 7  | 5.43  | 0.73  | 7  | 423.99  | 65.82  |
| 61 | 24 | Peltophorum dasyrrhachis         | RF1   | RF | 8  | 15.68 | 1.46  | 8  | 6.32  | 1.25  | 8  | 354.31  | 35.66  |
| 62 | 25 | Polyalthia cerasoides            | RF123 | RF | 6  | 18.45 | 2.45  | 6  | 11.94 | 1.47  | 6  | 368.80  | 21.78  |
| 63 | 26 | Pterospermum grewiifolium        | RF1   | RF | 7  | 13.06 | 1.49  | 7  | 7.66  | 0.66  | 7  | 1000.00 | -      |

|    |    |                    |       |    |   |       |      |   |       |      |   |        |       |
|----|----|--------------------|-------|----|---|-------|------|---|-------|------|---|--------|-------|
| 64 | 27 | Sandoricum indicum | EF1   | EF | 5 | 31.64 | 1.68 | 5 | 16.81 | 2.31 | 5 | 213.03 | 14.49 |
| 65 |    | Sandoricum indicum | EF2   | EF | 5 | 16.63 | 0.59 | 5 | 9.02  | 1.73 | 5 | 217.81 | 10.60 |
| 66 |    | Sandoricum indicum | EF3   | EF | 5 | 31.47 | 5.18 | 5 | 16.28 | 2.97 | 5 | 207.61 | 31.50 |
| 67 |    | Sandoricum indicum | RF1   | RF | 5 | 18.35 | 2.69 | 5 | 11.72 | 0.91 | 5 | 268.89 | 8.41  |
| 68 | 28 | Syzygium lineatum  | EF123 | EF | 7 | 14.31 | 1.09 | 7 | 8.01  | 0.84 | 7 | 407.93 | 19.94 |
| 69 | 29 | Terninalia catappa | CP3   | CP | 5 | 16.37 | 1.06 | 5 | 7.04  | 0.96 | 5 | 415.86 | 15.47 |
| 70 |    | Terninalia catappa | CP1   | CP | 5 | 22.61 | 2.81 | 5 | 5.36  | 0.61 | 5 | 249.75 | 34.40 |
| 71 |    | Terninalia catappa | RF123 | RF | 6 | 20.32 | 2.20 | 6 | 8.62  | 1.39 | 6 | 225.40 | 19.70 |
| 72 | 30 | Vatica odorata     | EF123 | EF | 6 | 11.96 | 2.79 | 6 | 6.77  | 2.40 | 6 | 406.42 | 77.64 |
| 73 |    | Vatica odorata     | EF1   | EF | 5 | 13.40 | 2.06 | 5 | 6.45  | 1.13 | 5 | 411.82 | 49.31 |
| 74 |    | Vatica odorata     | EF2   | EF | 6 | 15.63 | 1.15 | 6 | 11.44 | 1.53 | 6 | 301.63 | 46.41 |
| 75 |    | Vatica odorata     | RF3   | RF | 5 | 17.42 | 3.80 | 5 | 7.00  | 0.50 | 5 | 395.15 | 48.59 |
| 76 |    | Vatica odorata     | RF2   | RF | 5 | 12.28 | 1.29 | 5 | 5.36  | 0.67 | 5 | 406.63 | 13.84 |

**Table S6.4.** Woody species trait value sources and their shared percentages by plot of the data used to compute community weighted mean (CWM). In the column "Trait data source", the value "Plot" is species trait values derived directly from the species collected in its plot, "LC" value is species trait values obtained from its land-cover class when the trait species was not collected in its plot, and "Pool" value is trait values obtained from other land covers in Kulen; The column "Count" indicates the shared number of tree stands in the plot; "Total" is the total number of trees in the plot; and "Shared %" is the shared percentage of trees with different trait sources. "n. missing species" column is the number of missing species in each plot; the "Species" column contains the missing species in each plot. Seedlings were not included in this figure as they do not have *DBH* records and are not used in community weighted-mean calculations.

| N. | Forest type      | Plot ID | Trait data source | Tree stands |       |          | Missing tree species |                |
|----|------------------|---------|-------------------|-------------|-------|----------|----------------------|----------------|
|    |                  |         |                   | Count       | Total | Shared % | n. missing species   | Species        |
| 1  | Evergreen forest | EF1     | Plot              | 17          | 38    | 44.74    | NA                   | NA             |
| 2  | Evergreen forest | EF1     | LC                | 16          | 38    | 42.11    | NA                   | NA             |
| 3  | Evergreen forest | EF1     | Pool              | 5           | 38    | 13.16    | NA                   | NA             |
| 4  | Evergreen forest | EF2     | Plot              | 12          | 38    | 31.58    | NA                   | NA             |
| 5  | Evergreen forest | EF2     | LC                | 24          | 38    | 63.16    | NA                   | NA             |
| 6  | Evergreen forest | EF2     | Pool              | 1           | 38    | 2.63     | NA                   | NA             |
| 7  | Evergreen forest | EF2     | Missing           | 1           | 38    | 2.63     | 1                    | Agave sisalana |
| 8  | Evergreen forest | EF3     | Plot              | 13          | 33    | 39.39    | NA                   | NA             |
| 9  | Evergreen forest | EF3     | LC                | 14          | 33    | 42.42    | NA                   | NA             |
| 10 | Evergreen forest | EF3     | Pool              | 6           | 33    | 18.18    | NA                   | NA             |
| 11 | Regrowth forest  | RF1     | Plot              | 11          | 27    | 40.74    | NA                   | NA             |
| 12 | Regrowth forest  | RF1     | LC                | 15          | 27    | 55.56    | NA                   | NA             |
| 13 | Regrowth forest  | RF1     | Pool              | 1           | 27    | 3.70     | NA                   | NA             |
| 14 | Regrowth forest  | RF2     | Plot              | 34          | 58    | 58.62    | NA                   | NA             |
| 15 | Regrowth forest  | RF2     | LC                | 22          | 58    | 37.93    | NA                   | NA             |
| 16 | Regrowth forest  | RF2     | Pool              | 1           | 58    | 1.72     | NA                   | NA             |

|    |                 |     |         |    |    |        |    |                                        |
|----|-----------------|-----|---------|----|----|--------|----|----------------------------------------|
| 17 | Regrowth forest | RF2 | Missing | 1  | 58 | 1.72   | 1  | Dialium cochinchinense                 |
| 18 | Regrowth forest | RF3 | Plot    | 38 | 52 | 73.08  | NA | NA                                     |
| 19 | Regrowth forest | RF3 | LC      | 8  | 52 | 15.38  | NA | NA                                     |
| 20 | Regrowth forest | RF3 | Missing | 6  | 52 | 11.54  | 2  | Syzygium formosanum, Madhuca elliptica |
| 21 | Plantation      | CP1 | Plot    | 18 | 18 | 100.00 | NA | NA                                     |
| 22 | Plantation      | CP2 | Plot    | 10 | 10 | 100.00 | NA | NA                                     |
| 23 | Plantation      | CP3 | Plot    | 18 | 18 | 100.00 | NA | NA                                     |

---

220

## Subsection 7. Stand structure of different land-cover classes and plots.

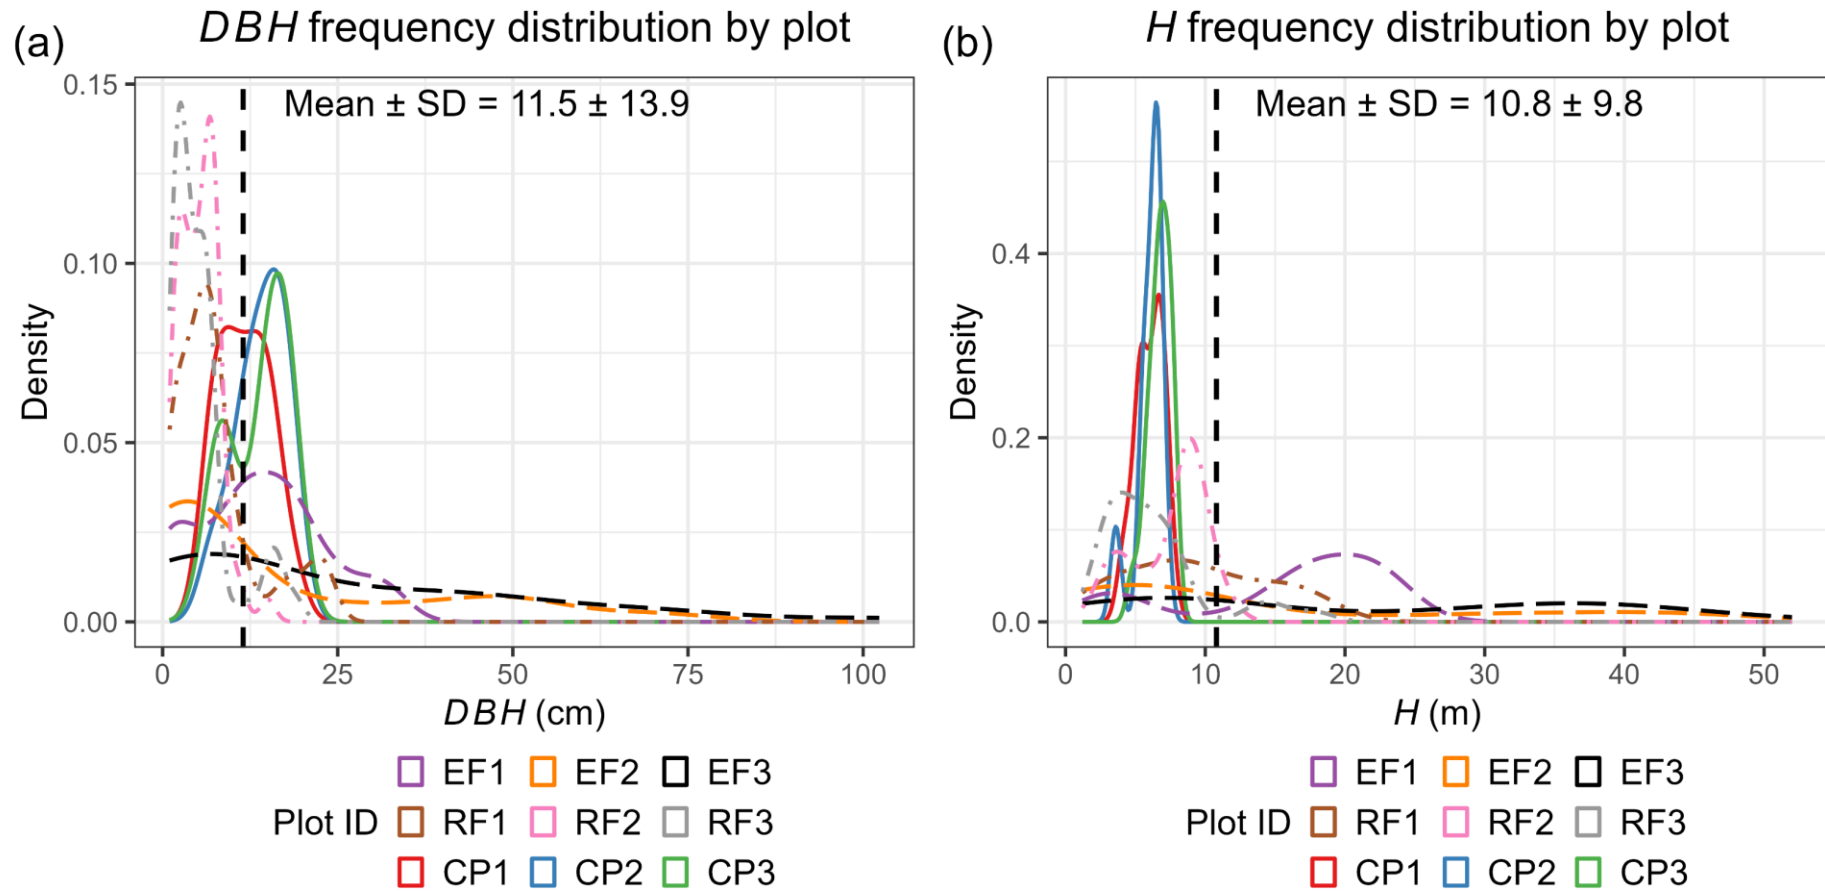

**Figure S7.1.** The frequency distributions of tree diameters at the breast height (*DBH*, cm) and height (*H*, m) across different plots. The plot labels “EF”, “RF”, and “CP” correspond to “evergreen forests”, “regrowth forests” and “cashew plantations” respectively.



230 **Table S7.1.** Ordinary least square regression statistical table of between diameter at breast height  $\ln(DBH)$  (cm) and height  $\ln(H)$  (m) for evergreen forests (EF), regrowth forests (RF), and cashew plantations (CP) in Kulen.

| <i>Predictors</i>    | EF<br>$\ln(H)$ |                          |                  |                                          |                             |                            | RF<br>$\ln(H)$ |                          |                  |                                          |                             |                            | CP<br>$\ln(H)$ |                          |                  |                                          |                             |                            |
|----------------------|----------------|--------------------------|------------------|------------------------------------------|-----------------------------|----------------------------|----------------|--------------------------|------------------|------------------------------------------|-----------------------------|----------------------------|----------------|--------------------------|------------------|------------------------------------------|-----------------------------|----------------------------|
|                      | <i>p</i>       | <i>t</i><br><i>value</i> | <i>Estimates</i> | <i>standardized</i><br><i>std. Error</i> | <i>std.</i><br><i>Error</i> | <i>std.</i><br><i>Beta</i> | <i>p</i>       | <i>t</i><br><i>value</i> | <i>Estimates</i> | <i>standardized</i><br><i>std. Error</i> | <i>std.</i><br><i>Error</i> | <i>std.</i><br><i>Beta</i> | <i>p</i>       | <i>t</i><br><i>value</i> | <i>Estimates</i> | <i>standardized</i><br><i>std. Error</i> | <i>std.</i><br><i>Error</i> | <i>std.</i><br><i>Beta</i> |
| (Intercept)          | <0.001         | 16.53                    | 0.85             | 0.02                                     | 0.05                        | 0.18                       | <0.001         | 14.66                    | 0.80             | 0.03                                     | 0.05                        | 0.37                       | <0.001         | 7.03                     | 0.94             | 0.09                                     | 0.13                        | 0.81                       |
| $\ln(DBH)$           | <0.001         | 35.71                    | 0.72             | 0.04                                     | 0.02                        | 0.94                       | <0.001         | 21.70                    | 0.70             | 0.04                                     | 0.03                        | 0.81                       | <0.001         | 6.72                     | 0.35             | 0.09                                     | 0.05                        | 0.53                       |
| Observations         | 109            |                          |                  |                                          |                             |                            | 137            |                          |                  |                                          |                             |                            | 46             |                          |                  |                                          |                             |                            |
| $R^2 / R^2$ adjusted | 0.92 / 0.92    |                          |                  |                                          |                             |                            | 0.78 / 0.78    |                          |                  |                                          |                             |                            | 0.51 / 0.50    |                          |                  |                                          |                             |                            |

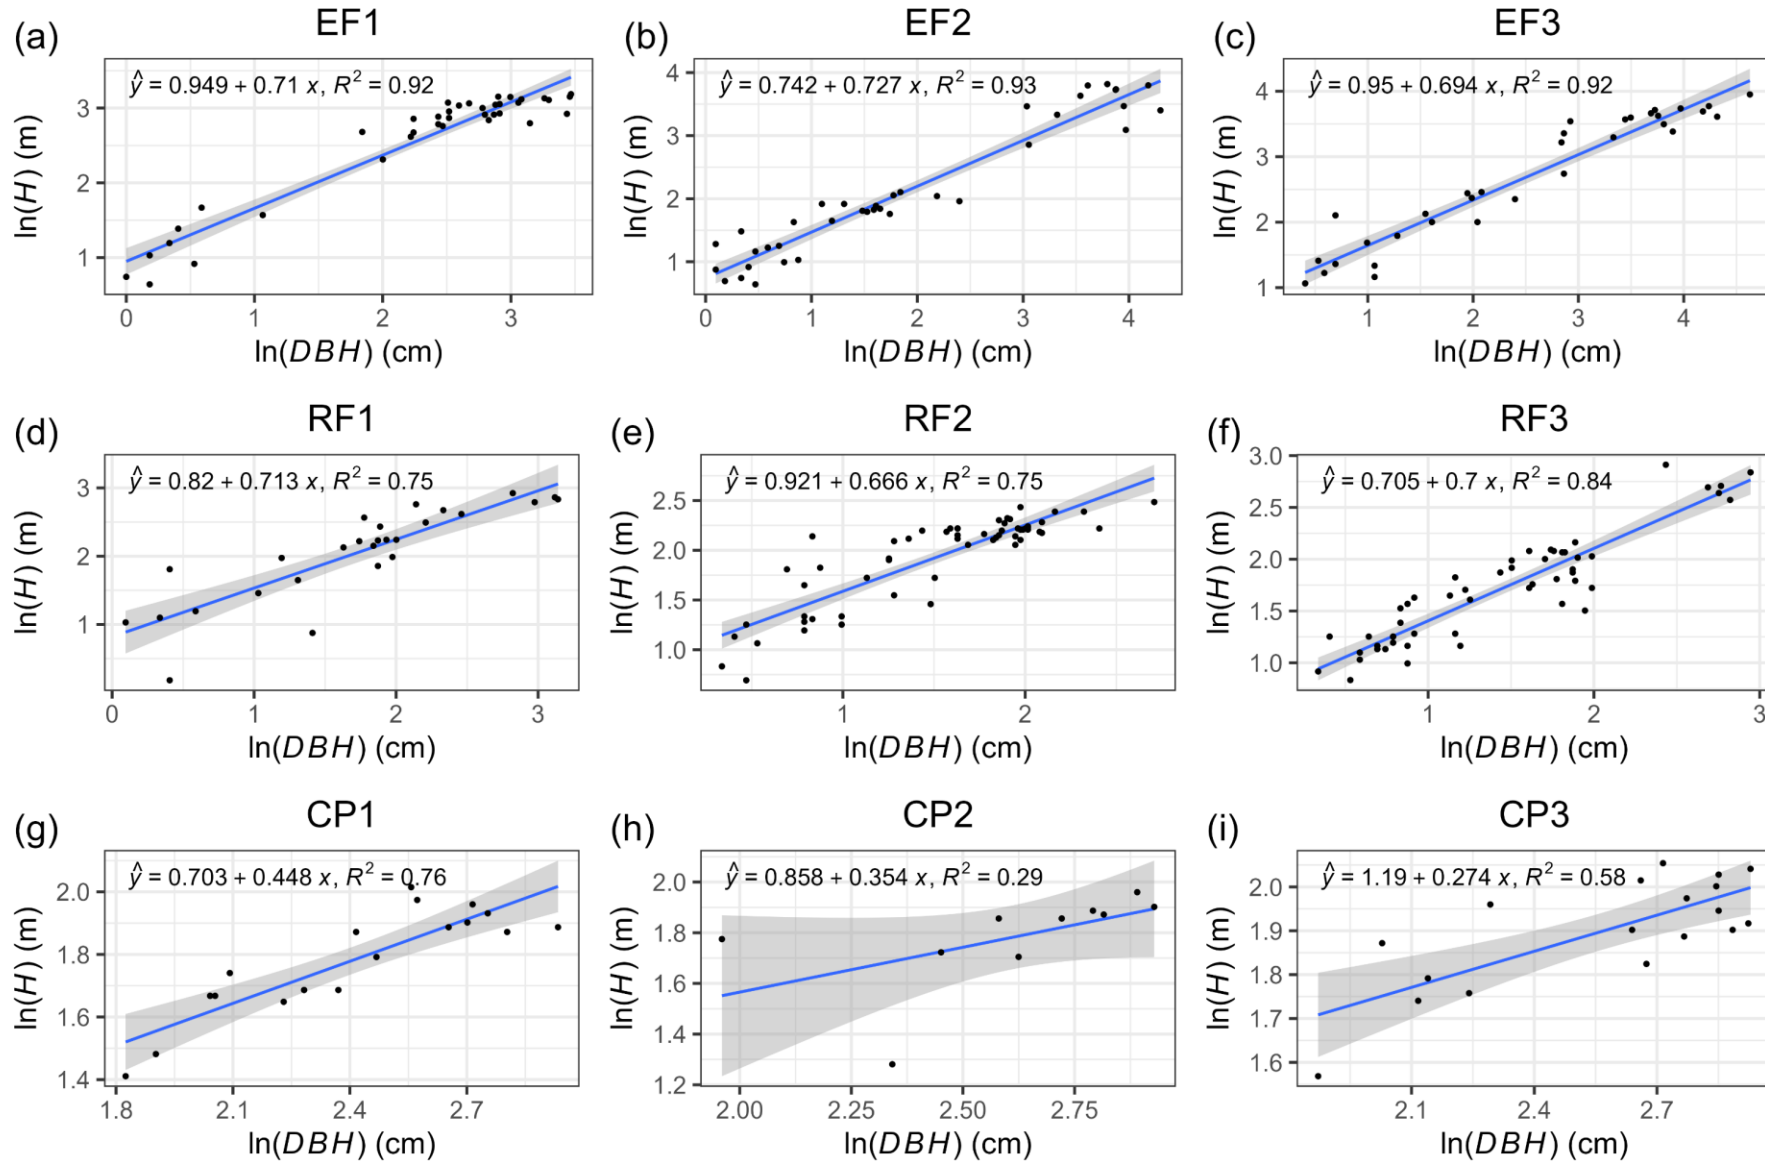

**Figure S7.2.** Relationship between diameter at breast height  $\ln(DBH)$  (cm) and height  $\ln(H)$  (m) for different inventory plots in evergreen forests (EF), regrowth forests (RF), and cashew plantations (CP) in Kulen. In (a), (b) and (c) present  $\ln(DBH)$  (cm) and  $\ln(H)$  (m) relationships at plots EF1, EF2, and EF3 of the evergreen forests; In (d), (e) and (f) present  $\ln(DBH)$  (m) and  $\ln(H)$  (m) relationships at plots RF1, RF2, and RF3 of regrowth forests; in (g), (h) and (i) present

240

*DBH* (cm) and *H* (m) relationships at plots CP1, CP2, and CP3 of cashew plantation. Based on the relationship below, the intercept parameter ( $K_1$ ) and slop parameter ( $K_2$ ) of the power law relationship between *DBH* (cm) and *H* (m) for each plot were obtained. The  $K_1$  and  $K_2$  parameters were used as community traits to investigate the relationship among other biodiversity and ecosystem property variables of various land-cover classes by plot level.

**Table S7.2.** The computed values of the intercept parameter ( $K_1$ ) and slop parameter ( $K_2$ ) of power-law relationship between diameter at breast height (*DBH*) (cm) and height (*H*) (m) for each plot.

| N | Land-cover class       | Plot ID | $K_1$ | $K_2$ |
|---|------------------------|---------|-------|-------|
| 1 | Evergreen forest (EF)  | EF1     | 2.583 | 0.710 |
| 2 | EF                     | EF2     | 2.100 | 0.727 |
| 3 | EF                     | EF3     | 2.586 | 0.694 |
| 4 | Regrowth forest (RF)   | RF1     | 2.270 | 0.713 |
| 5 | RF                     | RF2     | 2.512 | 0.666 |
| 6 | RF                     | RF3     | 2.025 | 0.700 |
| 7 | Cashew plantation (CP) | CP1     | 2.020 | 0.448 |
| 8 | CP                     | CP2     | 2.358 | 0.354 |
| 9 | CP                     | CP3     | 3.303 | 0.274 |

245

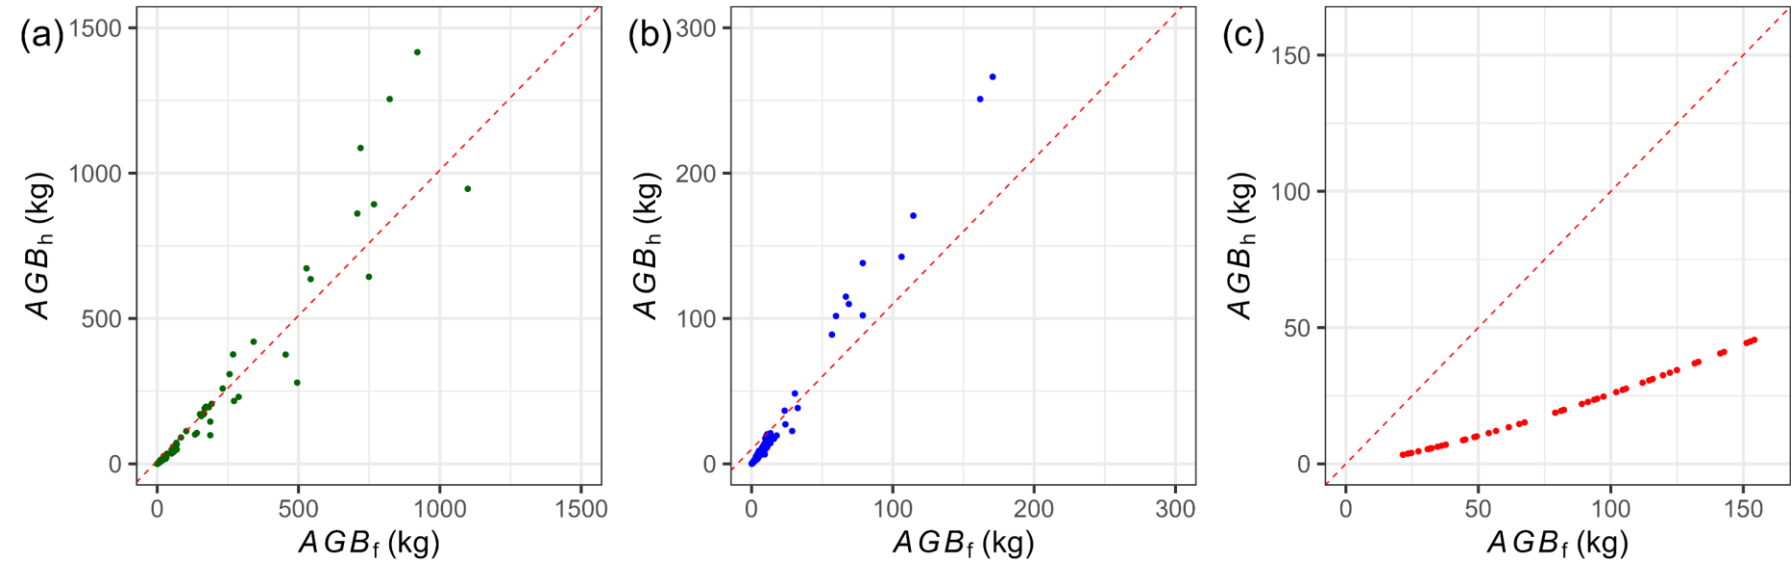

**Figure S7.3.** The 1:1 line plot comparison between aboveground biomass (*AGB*, kg) estimated by the diameter at breast height (*DBH*) and height (*H*) relationship ( $AGB_h$ , kg) and aboveground biomass estimated by adopted functions ( $AGB_f$ , kg) for evergreen forests (EF) (a), regrowth forests (RF) (b), and cashew plantations (CP) (c).

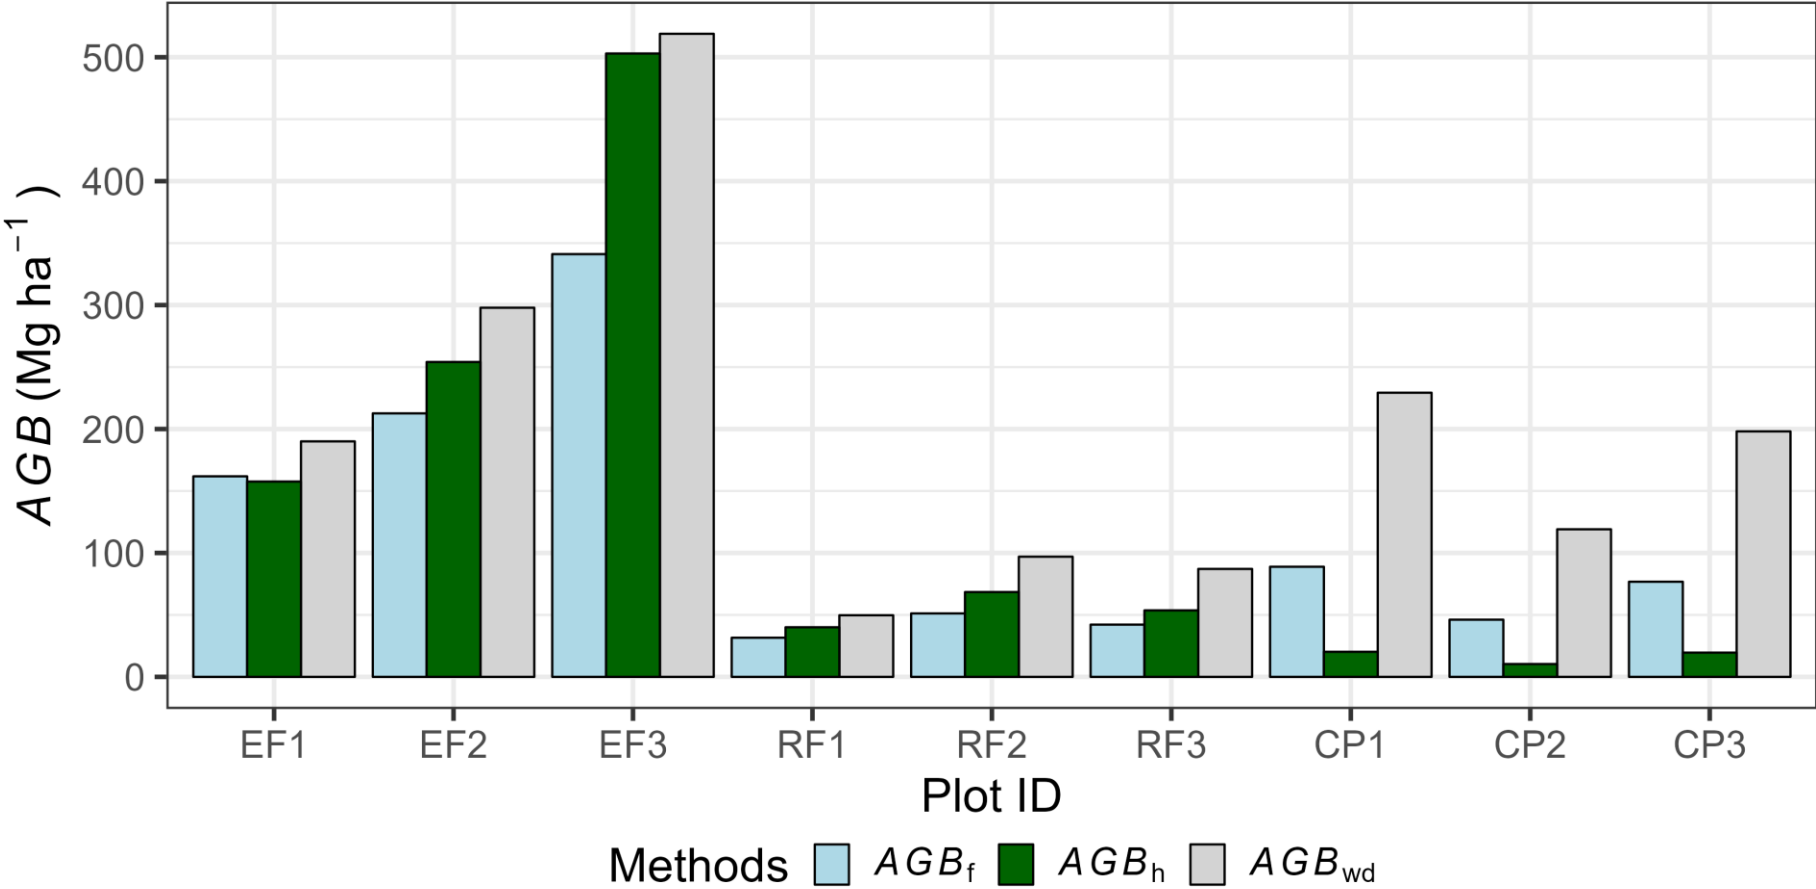

**Figure S7.4.** The estimation of aboveground biomass ( $AGB$ ) ( $\text{Mg ha}^{-1}$ ) by different methods for each inventory plot. “ $AGB_f$ ” represents aboveground biomass estimated by adopted functions; “ $AGB_{wd}$ ” represents aboveground biomass estimated by adopted functions utilizing species-specific wood density; “ $AGB_h$ ” represents aboveground biomass estimated by the diameter at breast height ( $DBH$ ) and height ( $H$ ) relationship, along with species-specific wood density, for our study site.

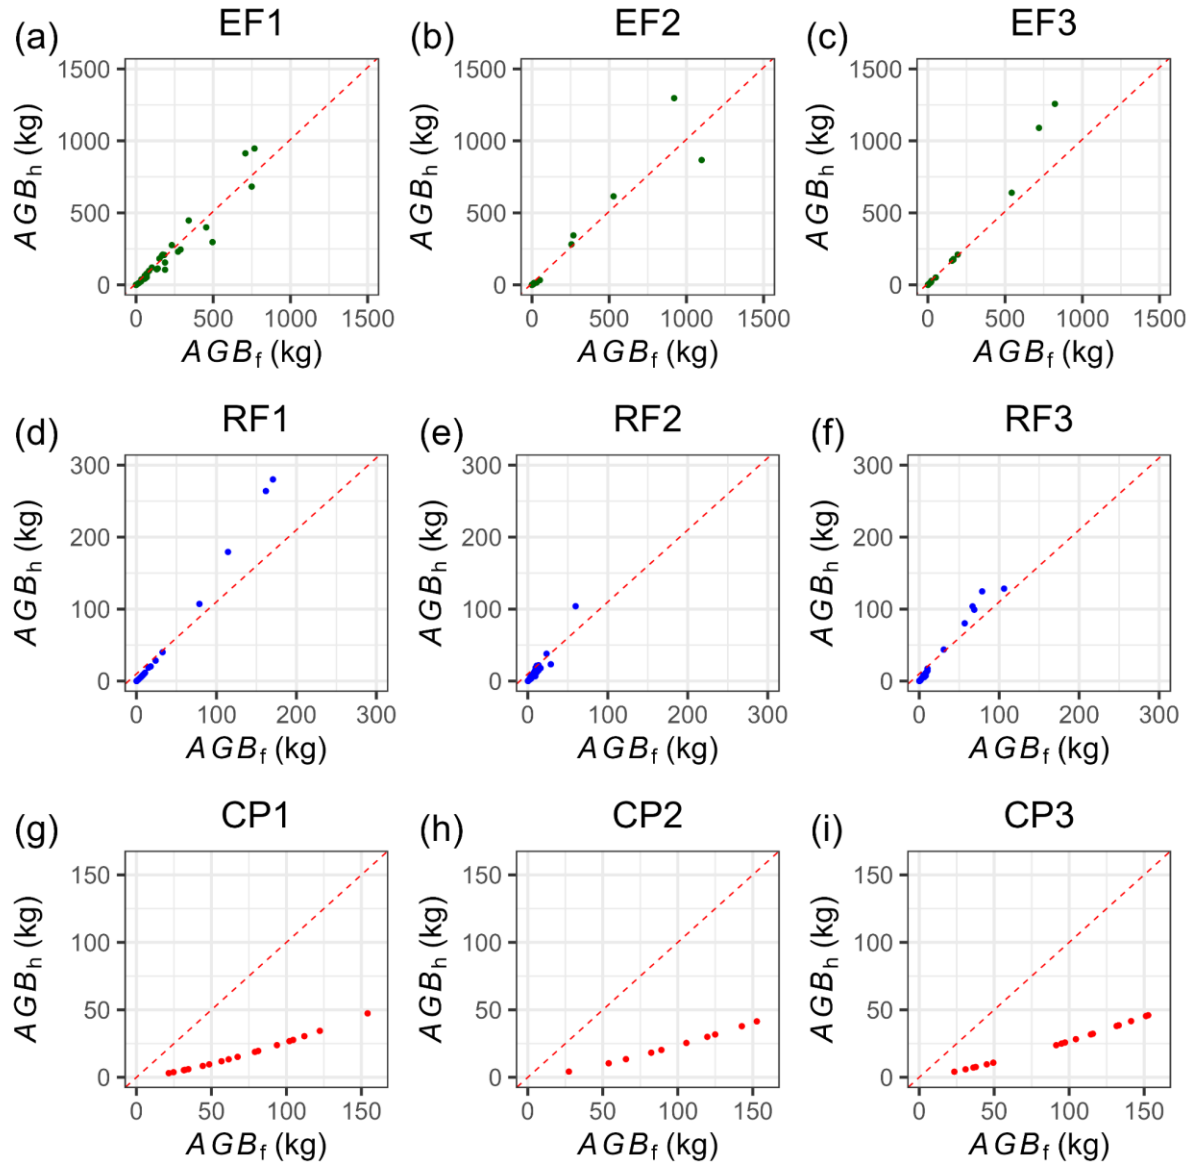

**Figure S7.5.** The 1:1 line plot comparison between aboveground biomass estimated by diameter at breast height ( $DBH$ ) and height ( $H$ ) relationship ( $AGB_h$ ) and aboveground biomass estimated by adopted functions ( $AGB_f$ ) for evergreen forest plots (EF1, EF2, and EF3) (a, b, and c), regrowth forest plots (RF1, RF2, and RF3) (d, e, and f), and cashew plantation plots (CP1, CP2, CP3) (g, h, and i).

260

**Table S7.3.** Distribution of stem density per hectare by *DBH* class for different land-cover classes. EF, RF, and CP stand for evergreen forests, regrowth forests, and cashew plantations.

| N. | Land cover | <i>DBH</i>    | Mean    | SD     | Min     | Max     | Sum     | Shared percentage of<br>number of stems |
|----|------------|---------------|---------|--------|---------|---------|---------|-----------------------------------------|
|    |            | Class<br>(cm) |         |        |         |         |         |                                         |
| 1  | EF (n = 3) | 5–15          | 800.00  | 435.89 | 500.00  | 1300.00 | 2400.00 | 78.72%                                  |
| 2  | EF (n = 3) | 15–30         | 162.95  | 130.20 | 66.66   | 311.08  | 488.84  | 16.03%                                  |
| 3  | EF (n = 3) | 30–100        | 53.36   | 30.57  | 20.01   | 80.04   | 160.08  | 5.25%                                   |
| 4  | RF (n = 3) | 5–15          | 2133.33 | 945.16 | 1400.00 | 3200.00 | 6400.00 | 97.30%                                  |
| 5  | RF (n = 3) | 15–30         | 59.25   | 51.31  | 0       | 88.88   | 177.76  | 2.70%                                   |
| 6  | CP (n = 3) | 5–15          | 933.33  | 450.92 | 500.00  | 1400.00 | 2800.00 | 87.50%                                  |
| 7  | CP (n = 3) | 15–30         | 133.32  | 58.79  | 88.88   | 199.98  | 399.96  | 12.50%                                  |

265

**Table S7.4.** Distribution of aboveground biomass (*AGB*) across diameter at breast height (*DBH*) classes for different land-cover classes. The total *AGB* estimated by *AGB<sub>h</sub>* method was used in the calculation. EF, RF and CP stand for evergreen forests, regrowth forests, and cashew plantations.

| N. | Land cover | <i>DBH</i> class (cm) | Mean ± SD (Mg ha <sup>-1</sup> ) | Range (Mg ha <sup>-1</sup> ) | Mean <i>AGB<sub>h</sub></i> (Mg ha <sup>-1</sup> ) | Shared percentage of <i>AGB<sub>h</sub></i> |
|----|------------|-----------------------|----------------------------------|------------------------------|----------------------------------------------------|---------------------------------------------|
| 1  | EF (n = 3) | 0–5                   | 6.51 ± 4.98                      | 0.84–10.21                   | 311.66 ± 183.88                                    | 2.09%                                       |
| 2  | EF (n = 3) | 5–15                  | 28.71 ± 30.97                    | 9.05–64.40                   |                                                    | 9.21%                                       |
| 3  | EF (n = 3) | 15–30                 | 42.17 ± 20.9                     | 30.05–66.30                  |                                                    | 13.53%                                      |
| 4  | EF (n = 3) | 30–100                | 234.27 ± 221.67                  | 15.98–459.18                 |                                                    | 75.17%                                      |
| 5  | RF (n = 3) | 0–5                   | 11.42 ± 7.72                     | 2.70–17.36                   | 54.19 ± 14.09                                      | 21.07%                                      |
| 6  | RF (n = 3) | 5–15                  | 33.17 ± 16.55                    | 18.01–50.82                  |                                                    | 61.21%                                      |
| 7  | RF (n = 3) | 15–30                 | 9.60 ± 8.89                      | 0.00–17.56                   |                                                    | 17.72%                                      |
| 8  | CP (n = 3) | 5–15                  | 11.91 ± 5.02                     | 7.22–17.21                   | 16.70 ± 4.80                                       | 71.32%                                      |
| 9  | CP (n = 3) | 15–30                 | 4.79 ± 2.26                      | 3.02–7.34                    |                                                    | 28.68%                                      |

270

275

## Subsection 8. Leaf area index and a fraction of absorbed photosynthetically active radiation.

**Table S8.1.** Descriptive statistics of observed leaf area index ( $LAI$ ) ( $\text{m}^2 \text{m}^{-2}$ ) measured at breast height and ground height for evergreen forests (EF), regrowth forests (RF), and cashew plantations (CP) by different months of a year. The "Month" column represents the months of the year (1 = January and 12 = December). The "n" column indicates the number of measurements in a specific month for each land cover.

| N. | Land cover | Month | $LAI_T$ ( $\text{m}^2 \text{m}^{-2}$ ) |      |      |        |      |      | $LAI_C$ ( $\text{m}^2 \text{m}^{-2}$ ) |      |      |        |      |      |
|----|------------|-------|----------------------------------------|------|------|--------|------|------|----------------------------------------|------|------|--------|------|------|
|    |            |       | n                                      | Mean | SD   | Median | Min  | Max  | n                                      | Mean | SD   | Median | Min  | Max  |
| 1  | CP         | 3     | 3                                      | 3.42 | 0.42 | 3.19   | 3.16 | 3.91 | 3                                      | 2.92 | 0.23 | 2.98   | 2.67 | 3.12 |
| 2  | CP         | 4     | 3                                      | 2.76 | 0.31 | 2.79   | 2.44 | 3.05 | 3                                      | 2.41 | 0.22 | 2.44   | 2.18 | 2.61 |
| 3  | CP         | 6     | 3                                      | 3.86 | 0.45 | 3.94   | 3.37 | 4.26 | 3                                      | 3.05 | 0.28 | 3.04   | 2.77 | 3.33 |
| 4  | CP         | 9     | 3                                      | 2.83 | 0.78 | 3.26   | 1.93 | 3.29 | 3                                      | 2.18 | 0.25 | 2.19   | 1.92 | 2.42 |
| 5  | CP         | 11    | 4                                      | 2.75 | 0.57 | 2.79   | 2.18 | 3.24 | 4                                      | 2.22 | 0.19 | 2.21   | 2.04 | 2.42 |
| 6  | CP         | 12    | 5                                      | 2.97 | 0.55 | 2.88   | 2.27 | 3.79 | 5                                      | 2.48 | 0.45 | 2.59   | 1.95 | 3.09 |
| 7  | EF         | 3     | 3                                      | 5.9  | 0.51 | 5.84   | 5.42 | 6.43 | 3                                      | 4.03 | 0.5  | 4.15   | 3.48 | 4.45 |
| 8  | EF         | 4     | 3                                      | 6.36 | 0.29 | 6.32   | 6.1  | 6.67 | 3                                      | 5.31 | 0.08 | 5.29   | 5.25 | 5.4  |
| 9  | EF         | 6     | 3                                      | 7.36 | 0.43 | 7.22   | 7.01 | 7.84 | 3                                      | 4.83 | 0.26 | 4.84   | 4.56 | 5.08 |
| 10 | EF         | 9     | 3                                      | 6.27 | 0.39 | 6.46   | 5.82 | 6.53 | 3                                      | 4.53 | 0.32 | 4.65   | 4.17 | 4.78 |
| 11 | EF         | 11    | 4                                      | 5.8  | 0.42 | 5.93   | 5.21 | 6.15 | 4                                      | 4.48 | 0.45 | 4.61   | 3.83 | 4.86 |
| 12 | EF         | 12    | 5                                      | 5.7  | 0.43 | 5.72   | 5.07 | 6.25 | 5                                      | 4.59 | 0.47 | 4.62   | 3.85 | 5.01 |
| 13 | RF         | 3     | 3                                      | 4.91 | 0.52 | 4.71   | 4.53 | 5.5  | 3                                      | 3.75 | 0.34 | 3.61   | 3.51 | 4.14 |
| 14 | RF         | 4     | 3                                      | 6.11 | 0.42 | 6.19   | 5.66 | 6.48 | 3                                      | 5.26 | 0.3  | 5.28   | 4.96 | 5.55 |
| 15 | RF         | 6     | 3                                      | 6.79 | 0.26 | 6.66   | 6.62 | 7.09 | 3                                      | 5.53 | 0.24 | 5.4    | 5.39 | 5.81 |
| 16 | RF         | 9     | 3                                      | 5.32 | 0.67 | 5.3    | 4.66 | 5.99 | 3                                      | 4.45 | 0.62 | 4.77   | 3.74 | 4.85 |
| 17 | RF         | 11    | 4                                      | 5.42 | 0.48 | 5.47   | 4.9  | 5.83 | 4                                      | 4.36 | 0.52 | 4.54   | 3.6  | 4.76 |
| 18 | RF         | 12    | 5                                      | 5.17 | 0.53 | 5.24   | 4.54 | 5.8  | 5                                      | 4.68 | 0.58 | 4.59   | 4.11 | 5.64 |

## Subsection 9. Relationships among ecosystem characteristics.

**Table S9.1.** Ordinary least squares regression model fit statistics for  $\ln(AGB_h)$  and  $\ln(S_R)$ ,  $\ln(AGB_h)$  and  $\ln(LAI_T)$ , and  $\ln(AGB_h)$  and  $\ln(SLA_{cwm})$ . The number of observations is the number of plots. ‘ $LAI_T$ ’ is a mean of total leaf area index, ‘ $AGB_h$ ’ is aboveground biomass, ‘ $SLA_{cwm}$ ’ is a community-weighted mean.

| Predictors           | $\ln(AGB_h)$ |                  |                  |                                |                   |                  | $\ln(AGB_h)$ |                  |                  |                                |                   |                  | $\ln(AGB_h)$ |                  |                  |                                |                   |                  |
|----------------------|--------------|------------------|------------------|--------------------------------|-------------------|------------------|--------------|------------------|------------------|--------------------------------|-------------------|------------------|--------------|------------------|------------------|--------------------------------|-------------------|------------------|
|                      | <i>p</i>     | <i>Statistic</i> | <i>Estimates</i> | <i>standardized std. Error</i> | <i>std. Error</i> | <i>std. Beta</i> | <i>p</i>     | <i>Statistic</i> | <i>Estimates</i> | <i>standardized std. Error</i> | <i>std. Error</i> | <i>std. Beta</i> | <i>p</i>     | <i>Statistic</i> | <i>Estimates</i> | <i>standardized std. Error</i> | <i>std. Error</i> | <i>std. Beta</i> |
| (Intercept)          | <0.001       | 6.09             | 2.72             | 0.21                           | 0.45              | 0.01             | 0.384        | -0.93            | -1.05            | 0.25                           | 1.13              | -0.16            | 0.026        | -2.81            | -8.38            | 0.24                           | 2.99              | -0.14            |
| $\ln(S_R)$           | 0.006        | 3.83             | 0.86             | 0.25                           | 0.22              | 0.59             |              |                  |                  |                                |                   |                  |              |                  |                  |                                |                   |                  |
| $\ln(LAI_T)$         |              |                  |                  |                                |                   |                  | 0.002        | 4.67             | 3.33             | 0.27                           | 0.71              | 0.69             |              |                  |                  |                                |                   |                  |
| $\ln(SLA_{cwm})$     |              |                  |                  |                                |                   |                  |              |                  |                  |                                |                   |                  | 0.004        | 4.20             | 4.63             | 0.27                           | 1.10              | 0.73             |
| Observations         | 9            |                  |                  |                                |                   |                  | 9            |                  |                  |                                |                   |                  | 9            |                  |                  |                                |                   |                  |
| $R^2 / R^2$ adjusted | 0.68 / 0.63  |                  |                  |                                |                   |                  | 0.76 / 0.72  |                  |                  |                                |                   |                  | 0.72 / 0.68  |                  |                  |                                |                   |                  |



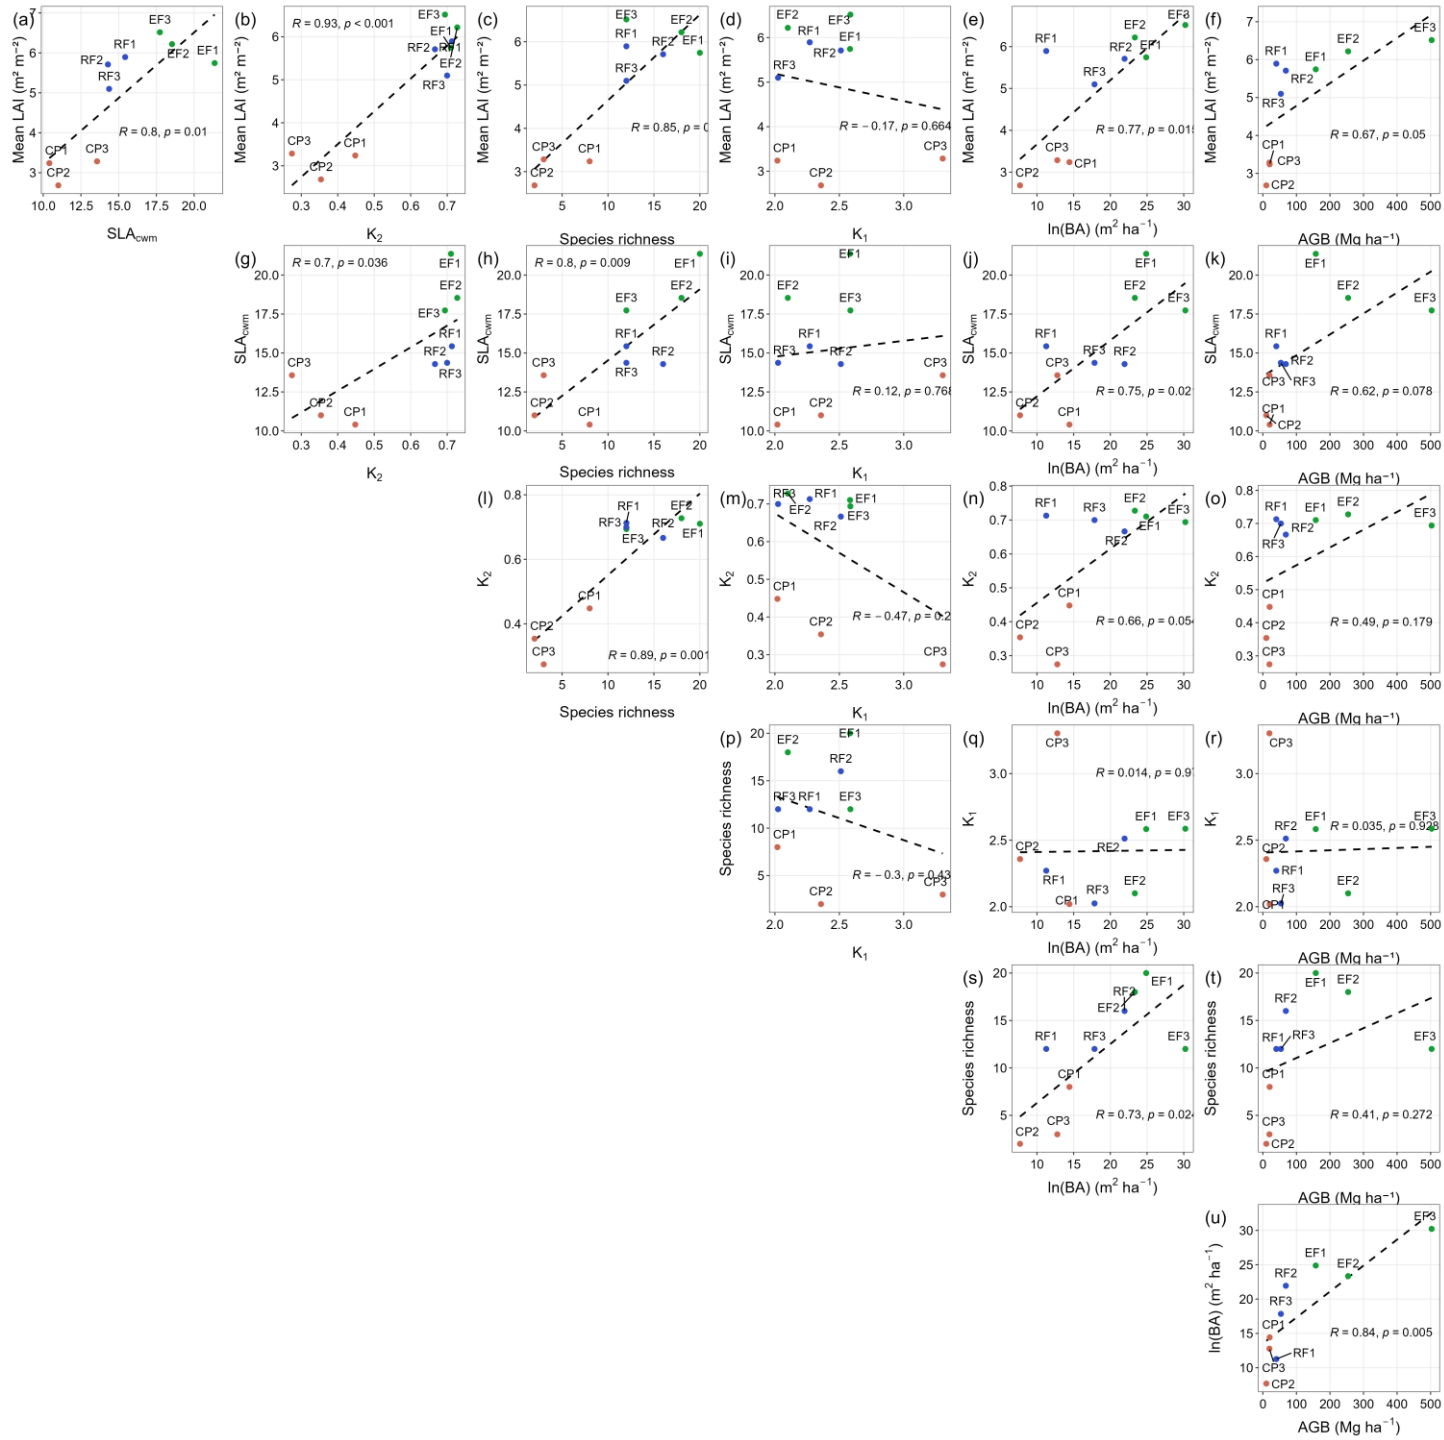

295 **Figure S9.1.** The relationship between biodiversity and ecosystem property variables of different land-cover classes in Kulen. ‘EF’, ‘RF’, and ‘CP’ are evergreen forests, regrowth forests and cashew plantations. The suffixes ‘1’, ‘2’, and ‘3’ are plot ID. The variables: ‘Mean  $LAI$ ’ means  $LAI$  measured at the ground level ( $m^2 m^{-2}$ ), ‘ $SLA_{cwm}$ ’ is community weighted mean of specific leaf area ( $kg m^{-2}$ ), and ‘Species richness’ is the counted number of species in each sample plot. ‘ $K_1$ ’ and ‘ $K_2$ ’ are the intercept and slope of the relationship between  $H$  and  $DBH$  at plot level (unitless). ‘ $AGB$ ’ is aboveground biomass ( $Mg ha^{-1}$ ) computed based on the relationship between  $DBH$  and  $H$  ( $AGB_h$ ).

300

## Subsection 10. Comparison of species richness, Shannon-Wiener index and *LAI* with previous studies.

**Table S10.1.** Comparison of species richness ( $S_R$ ) with previous studies.

| Region                         | Forest type                          | Species richness<br>(species per ha)                     | Methods                                               | References               |
|--------------------------------|--------------------------------------|----------------------------------------------------------|-------------------------------------------------------|--------------------------|
| Kulen, Cambodia                | Old-growth tropical evergreen forest | 87 (13 species per plot)                                 | Excluding seedling species, 3 plots, each 30 m x 50 m | In this study            |
| Kulen, Cambodia                | Old-growth tropical evergreen forest | 113 (17 species per plot)                                | Including seedling species, 3 plots, each 30 m x 50 m | In this study            |
| Kulen, Cambodia                | Regrowth evergreen forest            | 67 (10 species per plot)                                 | Excluding seedling species, 3 plots, each 30 m x 50 m | In this study            |
| Kulen, Cambodia                | Regrowth evergreen forest            | 87 (13 species per plot)                                 | Including seedling species, 3 plots, each 30 m x 50 m | In this study            |
| Central plains in Cambodia     | Various tropical forest types        | ~50-110 (Estimated based on species accumulation curves) | $DBH > 10$ , 119 plots, each 50 m x 10 m              | Theilade et al. (2022)   |
| Tanintharyi, Myanmar           | Moist evergreen forests              | 83–86                                                    | $DBH \geq 5$ cm, 25 sampling plots, each 20 m x 20 m  | Zin and Mitlöhner (2020) |
| Meghalaya, Northeast India     | Tropical evergreen forests           | 83                                                       | $DBH \geq 15$ cm, 1 ha sampling plot                  | Tynsong et al. (2022)    |
| Pahang National Park, Malaysia | Tropical rainforest                  | 280–450                                                  | $DBH \geq 10$ cm, 25 sampling plots, each 20 m x 20 m | Nazip (2012)             |
| Amazonia                       | Various forest types across Amazonia | 3–357                                                    | $DBH \geq 10$ cm, 2046 Sampling plots, 0.5–2 ha each  | Ter Steege et al. (2023) |

305

**Table S10.2.** Comparison of Shannon-Wiener index ( $S_H$ ) with previous studies.

| Region                         | Forest type                          | Shannon-Wiener index (unitless) | Methods                                                | References               |
|--------------------------------|--------------------------------------|---------------------------------|--------------------------------------------------------|--------------------------|
| Kulen, Cambodia                | Old-growth tropical evergreen forest | 2.48                            | Including seedling species, 3 plots, each 30 m x 50 m  | In this study            |
| Kulen, Cambodia                | Regrowth evergreen forest            | 1.97                            | Including seedling species, 3 plots, each 30 m x 50 m  | In this study            |
| Pahang National Park, Malaysia | Tropical rainforest                  | 3.42–3.97                       | $DBH \geq 10$ cm, 25 sampling plots, each 20 m x 20 m  | Nazip (2012)             |
| Tanintharyi, Myanmar           | Moist evergreen forests              | 4.42–4.45                       | $DBH \geq 5$ cm, 25 sampling plots, each 20 m x 20 m   | Zin and Mitlöhner (2020) |
| Nam Dong, Vietnam              | Lowland regrowth tropical forest     | 2.77–3.00                       | $DBH \geq 2.5$ cm, 40 sampling plots, each 20 m x 20 m | Yen and Cochard (2017)   |
| Thua Thien-Hue, Vietnam        | secondary tropical evergreen broad-  | 2.78–3.04                       | $DBH \geq 6$ cm, 40 sampling plots, each 20 m x 20 m   | Van and Cochard (2017)   |

**Table S10.3.** Comparing canopy leaf area index ( $LAI_C$ ) and total leaf area index ( $LAI_T$ ) of evergreen forests (EF) and regrowth forests (RF) with previous studies. Mean  $\pm$  SD or SEM is a mean plus or minus a standard deviation or a standard error of a mean.

| No.               | Region                       | Vegetation type                          | $LAI$ ( $m^2 m^{-2}$ )<br>(Mean $\pm$ SD or SEM) | Methods                                                                                 | References              |
|-------------------|------------------------------|------------------------------------------|--------------------------------------------------|-----------------------------------------------------------------------------------------|-------------------------|
| Evergreen forests |                              |                                          |                                                  |                                                                                         |                         |
| 1                 | Kulen, Cambodia              | Old-growth tropical evergreen forest     | $6.16 \pm 0.67$ (SD)                             | LAI-2000 ( $LAI_T$ , at ground height)                                                  | In this study           |
| 2                 | Kulen, Cambodia              | Old-growth tropical evergreen forest     | $4.62 \pm 0.50$ (SD)                             | LAI-2000 ( $LAI_C$ , at 1.3 m height)                                                   | In this study           |
| 3                 | Kampong Thom, Cambodia       | Old-growth tropical dry evergreen forest | 4.05                                             | LAI-2000 ( $LAI_C$ , unknown height)                                                    | Ito et al. (2007)       |
| 4                 | La Selva, Costa Rica         | Upland old-growth tropical wet forest    | $6.00 \pm 0.32$ (SEM)                            | Direct harvests ( $LAI_T$ , Floor to canopy top leaf harvests, 55 points across 500 ha) | Clark et al. (2008)     |
| 5                 | La Selva, Costa Rica         | Old-growth tropical forest               | $5.10 \pm 0.20$ (SEM)                            | LAI-2000 ( $LAI_C$ , above 1 m height)                                                  | Olivas et al. (2013)    |
| 6                 | La Selva, Costa Rica         | Old-growth tropical forest               | $4.90\text{--}6.00 \pm 0.20$ (SEM)               | Hemispherical photographs ( $LAI_C$ , above 1 m height)                                 | Olivas et al. (2013)    |
| 7                 | Amazonas, Brazil             | Old-growth tropical forest               | 5.70                                             | Direct harvests ( $LAI_T$ , Harvested four 10 m $\times$ 10 m forest plots)             | McWilliam et al. (1993) |
| 8                 | Amazonas, Brazil             | Old-growth tropical forest               | 5.58                                             | Hemispherical photographs ( $LAI_C$ , at 1 m height)                                    | Marthews et al. (2012)  |
| 9                 | Pará State, Brazil           | Old-growth tropical forest               | 4.30–5.70                                        | LAI-2000 (100 points, unknown height, five dates)                                       | Metcalf et al. (2010)   |
| 10                | Amazon region                | Tropical forest                          | 3.76–4.67                                        | Geosciences Laser Altimeter System ( $LAI_C$ , unknown height)                          | Tang and Dubayah (2017) |
| 11                | Amazon region                | Tropical forest                          | 4.58–5.15                                        | Geosciences Laser Altimeter System ( $LAI_T$ )                                          | Tang and Dubayah (2017) |
| 12                | Banten Province, Indonesia   | Tropical broadleaf forest                | 4.40–8.40                                        | Hemispherical Photographs ( $LAI_C$ , at 1.5 m height)                                  | Khairiah et al. (2017)  |
| 13                | North Karnataka state, India | Tropical evergreen forest                | $4.64 \pm 1.20$ (SD)                             | LAI-2200 ( $LAI_C$ , unknown height, 32 30 m $\times$ 30 m plots)                       | Middinti et al. (2017)  |
| Regrowth forests  |                              |                                          |                                                  |                                                                                         |                         |
| 1                 | Kulen, Cambodia              | Regrowth evergreen forest                | $5.57 \pm 0.76$ (SD)                             | LAI-2000 ( $LAI_T$ , at ground height)                                                  | In this study           |
| 2                 | Kulen, Cambodia              | Regrowth evergreen forest                | $4.66 \pm 0.70$ (SD)                             | LAI-2000 ( $LAI_C$ , at 1.3 m height)                                                   | In this study           |
| 3                 | Guangxi, China               | Tropical secondary forest                | $5.27 \pm 1.16$ (SD)                             | LAI-2200 ( $LAI_C$ , at 1.5 m height)                                                   | Xie et al. (2023)       |

|                           |                              |                                   |                       |                                            |                        |
|---------------------------|------------------------------|-----------------------------------|-----------------------|--------------------------------------------|------------------------|
| 4                         | Heredia Province, Costa Rica | 18-year tropical secondary forest | $3.97 \pm 0.55$ (SEM) | Direct harvests ( $LAI_C$ , at 1 m height) | Clark et al. (2021)    |
| 5                         | Heredia Province, Costa Rica | 25-year tropical secondary forest | $7.21 \pm 0.62$ (SEM) | Direct harvests ( $LAI_C$ , at 1 m height) | Clark et al. (2021)    |
| 6                         | Heredia Province, Costa Rica | 35-year tropical secondary forest | $6.45 \pm 0.69$ (SEM) | Direct harvests ( $LAI_C$ , at 1 m height) | Clark et al. (2021)    |
| <b>Cashew plantations</b> |                              |                                   |                       |                                            |                        |
| 1                         | Kulen, Cambodia              | Monoculture of cashew plantations | $3.07 \pm 0.61$       | LAI-2000 ( $LAI_T$ , at ground height)     | In this study          |
| 2                         | Kulen, Cambodia              | Monoculture of cashew plantations | $2.52 \pm 0.42$       | LAI-2000 ( $LAI_C$ , at 1.3 m height)      | In this study          |
| 3                         | Tamil Nadu, India            | Monoculture of cashew plantations | 0.52–1.25             | AccuPAR LP-80 ( $LAI_C$ , unknown height)  | Kumaresh et al. (2023) |

## References

- Clark, D. B., Oberbauer, S. F., Clark, D. A., Ryan, M. G., and Dubayah, R. O.: Physical Structure and Biological Composition of Canopies in Tropical Secondary and Old-Growth Forests, *PLOS ONE*, 16, e0256571, <https://doi.org/10.1371/journal.pone.0256571>, 2021.
- Clark, D. B., Olivas, P. C., Oberbauer, S. F., Clark, D. A., and Ryan, M. G.: First Direct Landscape-Scale Measurement of Tropical Rain Forest Leaf Area Index, a Key Driver of Global Primary Productivity, *Ecology Letters*, 11, 163-172, <https://doi.org/10.1111/j.1461-0248.2007.01134.x>, 2008.
- Ito, E., Khorn, S., Lim, S., Pol, S., Tith, B., Pith, P., Tani, A., Kanzaki, M., Kaneko, T., Okuda, Y., Kabeya, N., Nobuhiro, T., and Araki, M.: Comparison of the Leaf Area Index (Lai) of Two Types of Dipterocarp Forest on the West Bank of the Mekong River, Cambodia, in, *Springer Japan*, 214-221, [https://doi.org/10.1007/978-4-431-46503-4\\_19](https://doi.org/10.1007/978-4-431-46503-4_19), 2007.
- Khairiah, R. N., Setiawan, Y., Prasetyo, L. B., and Permatasari, P. A.: Leaf Area Index (Lai) in Different Type of Agroforestry Systems Based on Hemispherical Photographs in Cidanau Watershed, *IOP Conference Series: Earth and Environmental Science*, 54, 012050, <https://doi.org/10.1088/1755-1315/54/1/012050>, 2017.
- Kumaresh, V., Rani, M. S. A., Vethamoni, P. I., Senthil, A., and Uma, D.: Morphological and Physiological Analysis of Vri-3 Cashew Plantations under Different Planting Density Systems, *International Journal of Environment and Climate Change*, 13, 3698-3706, <https://doi.org/10.9734/ijec/2023/v13i103041>, 2023.
- Marthews, T. R., Malhi, Y., Girardin, C. A. J., Silva Espejo, J. E., Aragão, L. E. O. C., Metcalfe, D. B., Rapp, J. M., Mercado, L. M., Fisher, R. A., Galbraith, D. R., Fisher, J. B., Salinas-Revilla, N., Friend, A. D., Restrepo-Coupe, N., and Williams, R. J.: Simulating Forest Productivity Along a Neotropical Elevational Transect: Temperature Variation and Carbon Use Efficiency, *Global Change Biology*, 18, 2882-2898, <https://doi.org/10.1111/j.1365-2486.2012.02728.x>, 2012.
- McWilliam, A. L. C., Roberts, J. M., Cabral, O. M. R., Leitao, M. V. B. R., de Costa, A. C. L., Maitelli, G. T., and Zamparoni, C. A. G. P.: Leaf Area Index and above-Ground Biomass of Terra Firme Rain Forest and Adjacent Clearings in Amazonia, *Functional Ecology*, 7, 310-317, <https://doi.org/10.2307/2390210>, 1993.
- Metcalfe, D. B., Lobo-Do-Vale, R., Chaves, M. M., Maroco, J. P., C Aragão, L. E. O., Malhi, Y., Da Costa, A. L., Braga, A. P., Gonçalves, P. L., De Athaydes, J., Da Costa, M., Almeida, S. S., Campbell, C., Hurry, V., Williams, M., and Meir, P.: Impacts of Experimentally Imposed Drought on Leaf Respiration and Morphology in an Amazon Rain Forest, *Functional Ecology*, 24, 524-533, <https://doi.org/10.1111/j.1365-2435.2009.01683.x>, 2010.
- Middinti, S., Thumaty, K. C., Gopalakrishnan, R., Jha, C. S., and Thatiparthi, B. R.: Estimating the Leaf Area Index in Indian Tropical Forests Using Landsat-8 Oli Data, *International Journal of Remote Sensing*, 38, 6769-6789, <https://doi.org/10.1080/01431161.2017.1363436>, 2017.
- Nazip, M.: Tree Species Diversity and Forest Stand Structure of Pahang National Park, Malaysia, in, *InTech*, <https://doi.org/10.5772/50339>, 2012.
- Olivas, P. C., Oberbauer, S. F., Clark, D. B., Clark, D. A., Ryan, M. G., O'Brien, J. J., and Ordoñez, H.: Comparison of Direct and Indirect Methods for Assessing Leaf Area Index across a Tropical Rain Forest Landscape, *Agricultural and Forest Meteorology*, 177, 110-116, <https://doi.org/10.1016/j.agrformet.2013.04.010>, 2013.
- Swedish NFI: Swedish National Forest Inventory and Swedish Soil Inventory: Field Work Instructions 2019, The Department of Forest Resource Management. Swedish University of Agricultural Sciences, Umeå, Sweden, 504, 2019.
- Tang, H. and Dubayah, R.: Light-Driven Growth in Amazon Evergreen Forests Explained by Seasonal Variations of Vertical Canopy Structure, 114, 2640-2644, <https://doi.org/10.1073/pnas.1616943114>, 2017.

- 345 Ter Steege, H., Pitman, N. C. A., Do Amaral, I. L., De Souza Coelho, L., De Almeida Matos, F. D., De Andrade Lima Filho, D., Salomão, R. P., Wittmann, F., Castilho, C. V., Guevara, J. E., Veiga Carim, M. D. J., Phillips, O. L., Magnusson, W. E., Sabatier, D., Revilla, J. D. C., Molino, J.-F., Irueme, M. V., Martins, M. P., Da Silva Guimarães, J. R., Ramos, J. F., Bánki, O. S., Piedade, M. T. F., Cárdenas López, D., Rodrigues, D. D. J., Demarchi, L. O., Schöngart, J., Almeida, E. J., Barbosa, L. F., Cavaleiro, L., Dos Santos, M. C. V., Luiz, B. G., De Leão Novo, E. M. M., Vargas, P. N., Silva, T. S. F., Venticinque, E. M., Manzatto, A. G., Reis, N. F. C., Terborgh, J., Casula, K. R., Honório Coronado, E. N., Monteagudo Mendoza, A., Montero, J. C., Costa, F. R. C., Feldpausch, T. R., Quaresma, A. C., Castaño
- 350 Arboleda, N., Zartman, C. E., Killeen, T. J., Marimon, B. S., Marimon-Junior, B. H., Vasquez, R., Mostacedo, B., Assis, R. L., Baraloto, C., Do Amaral, D. D., Engel, J., Petronelli, P., Castellanos, H., De Medeiros, M. B., Simon, M. F., Andrade, A., Camargo, J. L., Laurance, W. F., Laurance, S. G. W., Manigüaje Rincón, L., Schiatti, J., Sousa, T. R., De Sousa Farias, E., Lopes, M. A., Magalhães, J. L. L., Nascimento, H. E. M., De Queiroz, H. L., Aymard, C. G. A., Brien, R., Stevenson, P. R., Araujo-Murakami, A., Baker, T. R., Cintra, B. B. L., Feitosa, Y. O., Mogollón, H. F., Duivenvoorden, J. F., Peres, C. A., Silman, M. R., Ferreira, L. V., Lozada, J. R., Comiskey, J. A., Draper, F. C., De Toledo, J. J., Damasco, G., García-Villacorta, R., Lopes, A., Vicentini, A., Cornejo Valverde, F., Alonso, A.,
- 355 Arroyo, L., Dallmeier, F., Gomes, V. H. F., Jimenez, E. M., Neill, D., Peñuela Mora, M. C., Noronha, J. C., De Aguiar, D. P. P., Barbosa, F. R., Bredin, Y. K., De Sá Carpanedo, R., Carvalho, F. A., De Souza, F. C., Feeley, K. J., Gribel, R., Haugaasen, T., Hawes, J. E., Pansonato, M. P., Ríos Paredes, M., Barlow, J., Berenguer, E., Da Silva, I. B., Ferreira, M. J., Ferreira, J., Fine, P. V. A., Guedes, M. C., Levis, C., Licona, J. C., Villa Zegarra, B. E., Vos, V. A., Cerón, C., Durgante, F. M., Fonty, É., Henkel, T. W., Householder, J. E., Huamantupa-Chuquimaco, I., Pos, E., Silveira, M., Stropp, J., Thomas, R., Daly, D., Dexter, K. G., Milliken, W., Molina, G. P., Pennington, T., Vieira, I. C. G., Weiss Albuquerque, B., Campelo, W., Fuentes, A., Klitgaard, B., Pena, J. L. M., Tello, J. S., Vriesendorp, C., Chave, J., Di Fiore, A., Hilário, R. R., De Oliveira Pereira, L., Phillips, J. F., Rivas-Torres, G., Van Andel, T. R., Von Hildebrand, P., Balee, W., Barbosa, E. M., De Matos Bonates, L. C., Dávila Doza, H. P., Zárate Gómez, R., Gonzales, T., Gallardo Gonzales, G. P., Hoffman, B., Junqueira, A. B., Malhi, Y., De Andrade Miranda, I. P., Pinto, L. F. M., Prieto, A., Ruelas, A., Ruschel, A. R., Silva, N., Vela, C. I. A., Zent, E. L., Zent, S., Cano, A., Carrero Márquez, Y. A., Correa, D. F., Costa, J. B. P., Flores, B. M., Galbraith, D., Holmgren, M., Kalamandeen, M., Lobo, G., Torres Montenegro, L., Nascimento, M. T., Oliveira, A. A., Pombo, M. M., Ramirez-Angulo, H., Rocha, M., Scudeller, V. V., Sierra, R., Tirado, M., Umaña, M. N., Van Der Heijden, G., Vilanova Torre, E., Reategui, M. A. A., Baider, C., Balslev, H., Cárdenas, S., Casas, L. F., Endara, M. J., Farfan-Rios, W., Ferreira, C., Linares-Palomino, R., Mendoza, C., Mesones, I., Parada, G. A., Torres-Lezama, A., Urrego Giraldo, L. E., Villarroel, D., Zagt, R., Alexiades, M. N., De Oliveira, E. A., Garcia-Cabrera, K., Hernandez, L., Cuenca, W. P., Pansini, S., Pauletto, D., Ramirez Arevalo, F., Sampaio, A. F., Valderrama Sandoval, E. H., Gamarra, L. V., Levesley, A., Pickavance, G., and Melgão, K.: Mapping Density, Diversity and Species-Richness of the Amazon Tree Flora, *Communications Biology*, 6, <https://doi.org/10.1038/s42003-023-05514-6>, 2023.
- 360 Than, S., Vesa, L., Vanna, S., Hyvönen, P., Korhonen, K., Gael, S., Matieu, H., and van Rijn, M.: Field Manual for the National Forest Inventory of Cambodia, 2nd Eds, Forest Administration of the Ministry of Agriculture, Forestry and Fisheries & Food and Agriculture Organization of the United Nations, Phnom Penh, Cambodia, 2018.
- Theilade, I., Phourin, C., Schmidt, L., Meilby, H., van de Bult, M., and Friborg, K. G.: Evergreen Forest Types of the Central Plains in Cambodia: Floristic Composition and Ecological Characteristics, 2022, e03494, <https://doi.org/10.1111/njb.03494>, 2022.
- 375 Tynsong, H., Dkhar, M., and Tiwari, B. K.: Tree Diversity and Vegetation Structure of the Tropical Evergreen Forests of the Southern Slopes of Meghalaya, North East India, *Asian Journal of Forestry*, 6, <https://doi.org/10.13057/asianjfor/r060104>, 2022.
- Van, Y. T. and Cochard, R.: Tree Species Diversity and Utilities in a Contracting Lowland Hillside Rainforest Fragment in Central Vietnam, *Forest Ecosystems*, 4, <https://doi.org/10.1186/s40663-017-0095-x>, 2017.
- Xie, X., Yang, Y., Li, W., Liao, N., Pan, W., and Su, H.: Estimation of Leaf Area Index in a Typical Northern Tropical Secondary Monsoon Rainforest by Different Indirect Methods, *Remote Sensing*, 15, 1621, <https://doi.org/10.3390/rs15061621>, 2023.
- 380 Yen, V. T. and Cochard, R.: Chapter 5 - Structure and Diversity of a Lowland Tropical Forest in Thua Thien Hue Province, in: *Redefining Diversity & Dynamics of Natural Resources Management in Asia*, Volume 3, edited by: Thang, T. N., Dung, N. T., Hulse, D., Sharma, S., and Shivakoti, G. P., Elsevier, 71-85, <https://doi.org/10.1016/B978-0-12-805452-9.00005-9>, 2017.
- Zin, I. I. S. and Mitlöhner, R.: Species Composition and Stand Structure of Primary and Secondary Moist Evergreen Forests in the Tanintharyi Nature Reserve (Tnr) Buffer Zone, Myanmar, *Open Journal of Forestry*, 10, 445-459, <https://doi.org/10.4236/ojfor.2020.104028> 2020.
