# Supplementary material for: Characteristics of ecosystems under various anthropogenic impacts in a tropical forest region of Southeast Asia
Source: Copernicus journal article supplement (doi:10.5194/egusphere-2024-3784), 2025-01-07
Supplement: Supplementary file [file egusphere-2024-3784-RC3-supplement.pdf]

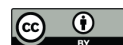

This title sounds too general

## Characteristics of ecosystems under various anthropogenic impacts in a tropical forest region of Southeast Asia

Chansopheaktra Sovann<sup>1,2</sup>, Torbern Tagesson<sup>1</sup>, Patrik Vestin<sup>1</sup>, Sakada Sakhoeun<sup>3</sup>, Soben Kim<sup>4</sup>, Sothea Kok<sup>2</sup>, Stefan Olin<sup>1</sup>

5 <sup>1</sup>Department of Physical Geography and Ecosystem Science, Lund University, Sölvegatan 12, S-223 62 Lund, Sweden

<sup>2</sup>Department of Environmental Science, Royal University of Phnom Penh, Phnom Penh, 120404, Cambodia

<sup>3</sup>Provincial Department of Environment, Ministry of Environment, Siem Reap, 171202, Cambodia

<sup>4</sup>Faculty of Forestry, Royal University of Agriculture, Phnom Penh, 120501, Cambodia

*Correspondence to:* Chansopheaktra Sovann (chansopheaktra.sovann@nateko.lu.se)

10 **Abstract.** Given the severe anthropogenic pressure on tropical forests and the high demand for field observations of ecosystem characteristics, it is crucial to collect such data both in pristine tropical forests and in the converted deforested land-cover classes. To gain insight into the ecosystem characteristics of pristine tropical forests, regrowth forests, and cashew plantations, we established an ecosystem monitoring site in Phnom Kulen National Park, Cambodia. Here, we present the first observed datasets at this site of forest inventories, leaf area index, leaf traits of woody species, a fraction of intercepted photosynthetically active radiation, and soil and meteorological conditions. We examined how land-cover change affects the species and functional diversity, stand structure, and soil conditions among the three land-cover classes. We found significant reductions in several ecosystem characteristics, caused by the anthropogenic land cover conversion, which underlines the profound impact land-cover change has on ecosystem productivity, resilience, and functioning in these tropical forest regions. We further investigated relationships between diameters at breast height and tree height, and demonstrated the feasibility of locally updating aboveground biomass estimates using power-law functions. These datasets and findings can contribute to filling data gaps in tropical forest research, addressing global environmental challenges, and supporting sustainable forest management. The datasets are available at <https://doi.org/10.5281/zenodo.10146582> (Sovann et al., 2024a) and <https://doi.org/10.5281/zenodo.10159726> (Sovann et al., 2024b), and future data from the field site will be uploaded on a regular basis to [https://zenodo.org/communities/cambodia\\_ecosystem\\_data](https://zenodo.org/communities/cambodia_ecosystem_data).

25

**Keywords:** tropical forest, forest ecosystem, forest inventory, biomass, Kulen, Cambodia.

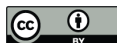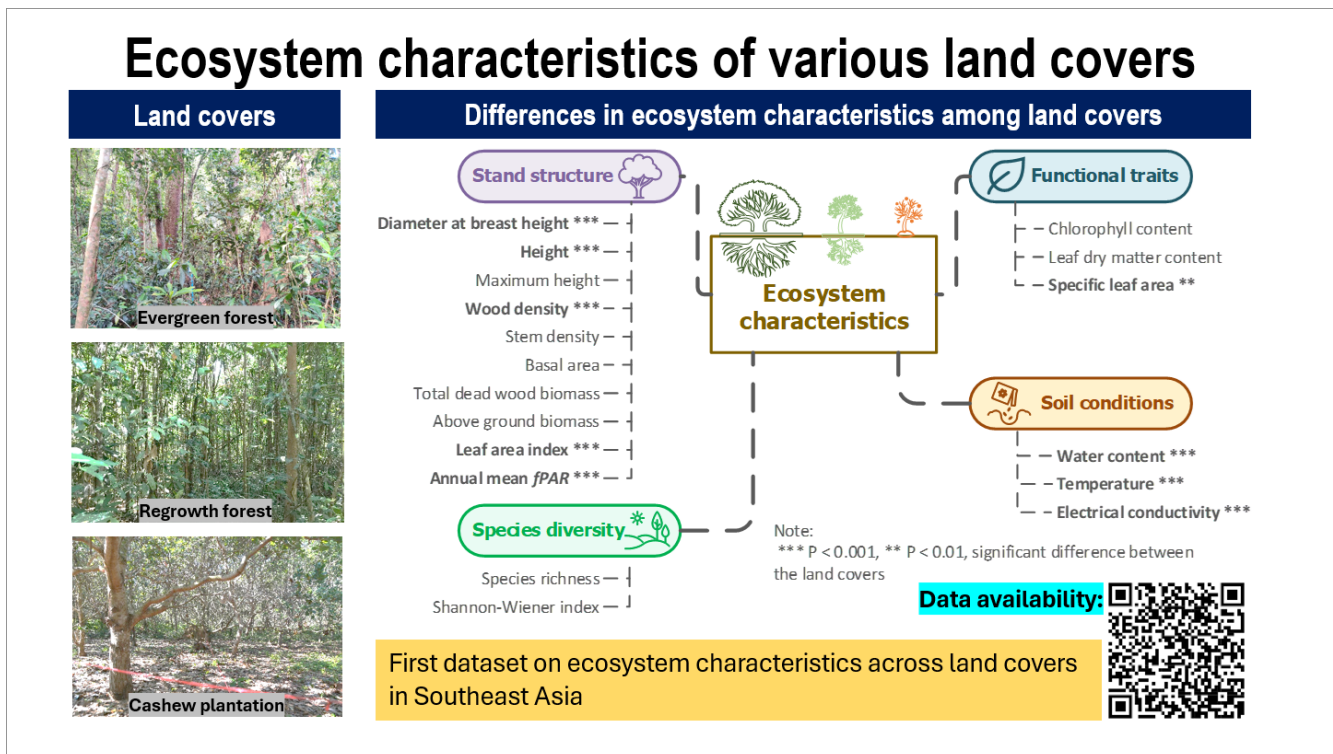

## 1 Introduction

30 Tropical forests cover approximately 14 % of the Earth's surface (Fichtner and Härdtle, 2021) and contribute significantly to global terrestrial biodiversity (Giam, 2017) and biogeochemical cycles (Artaxo et al., 2022). Tropical forests produce at least 30 % of the global terrestrial net primary production (Townsend et al., 2011; Joseph Wright, 2013) and store approximately 60 % of the global terrestrial biomass (Pan et al., 2013). In addition, they play a critical role in regulating hydrological cycles on a continental scale (Gloor et al., 2013). Tropical forests have been under severe anthropogenic pressures from agricultural

35 land expansion, resource exploitation (logging, mining), and urbanization (Gardner et al., 2009; Laurance et al., 2013). Due to these disturbances, tropical forest ecosystems have degraded, resulting in a decrease in biodiversity (Barlow et al., 2016). Southeast Asia, though harbouring roughly 15 % of the world's tropical forests (Stibig et al., 2014), has suffered the highest global deforestation rates over the past 15 years (Miettinen et al., 2011). This alarming trend threatens over 40 % of the region's biodiversity by 2100 (Sodhi et al., 2004). The forests are mainly disturbed by timber harvesting (Pearson et al., 2017), slash-

40 and-burn agriculture, and agricultural plantations as a consequence of fulfilling global demands for timber production and agricultural commodities, especially rubber, cashew, oil palm, Eucalyptus and Acacia (Phompila et al., 2014; Grogan et al., 2015; Chen et al., 2016; Johansson et al., 2020). In addition to primary forests, secondary forests that regenerate after clear-cutting or other ecosystem disturbances are also important for protecting biodiversity and assuring the availability of ecosystem

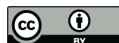

services and goods (Tito et al., 2022). However, despite the significance of tropical forests in biodiversity conservation and ecosystem services, little is known about how the conversion from primary to secondary forests and plantations impacts biodiversity and ecosystem functioning (Edwards et al., 2011; Singh et al., 2014). In the context of tackling the current global environmental challenges, ~~land-cove ?~~ ~~it is necessary to conduct ...~~ ~~in order to investigating the~~ field observation data are necessary to assess the dynamic responses of ecosystems to changing environmental conditions on fine spatial and temporal scales. Field observations of ecosystem characteristics provide crucial insights into key ecosystem functions and services, such as vegetation productivity, carbon sequestration, hydrological cycle, ecosystem stability and resilience to disturbances, nutrient reservoir capacity, and the abundance of habitats of organisms (Naeem et al., 1994; Hector, 1998; Cardinale et al., 2012; Chen et al., 2016; Liang et al., 2016; Parisi et al., 2018b; Woodall et al., 2020). Since the collection of field observations is time consuming and labour intensive, the availability of such data is in general limited, and in particular from tropical forests (DeFries et al., 2007; Li et al., 2021). In addition, field data are important for the parameterization and evaluation of remote sensing products and dynamic vegetation models, essential for modelling and upscaling ecosystem responses to anthropogenic disturbances and climate change (Feng et al., 2018). Hence, there is an increasing demand for field observations of environmental variables and ecosystem characteristics, resulting in open data repositories such as FLUXNET, ICOS Carbon Portal, SpecNet, and the TRY database (Gamon et al., 2010; Kattge et al., 2020; Pastorello et al., 2020). ~~Given the severe anthropogenic pressures on tropical forests and the high demand for field observations of ecosystem characteristics of tropical forests, it is crucial to collect such data, both in pristine tropical forests and in the land cover the deforested regions are converted into. The data from different land-cover classes will aid in quantifying the effect the land-cover conversion has on the ecosystem characteristics.~~ To gain insight into the impact of land cover conversion on ecosystem characteristics, we therefore established an ecosystem monitoring site in Phnom Kulen National Park (Kulen), Cambodia. The main aim of this study is to describe the first unique in situ data of ecosystem characteristics of pristine tropical forests, regrowth forests, and cashew plantations from this novel monitoring site. The **ecosystem level** collected data include [1] forest inventory, [2] leaf traits of woody species, [3] leaf area index (*LAI*), [4] fraction of photosynthetically active radiation (*fPAR*), and [5] soil conditions. We also installed a weather station to collect data of the meteorological conditions of the wider area (the Kulen National Park). With these data, we will analyse the difference in ecosystem characteristics of these land-cover classes, explore relationships between ecosystem characteristics, and how these are affected by conversions between these land-cover classes. ~~are you sure? some also at plot level?~~ ~~Can you come up with specific scientific questions and also give hypothesis?~~

## 2 Materials and Methods

### 2.1 Study area and selection of plots

The selected study area is the Phnom Kulen National Park located in the Siem Reap Province in north-west Cambodia (Fig. 1). It covers 37,380 ha predominantly on sandstone plateaus with the highest peak of 496 m (Geissler et al., 2019). **Kulen is a hotspot for ecosystem service provisioning in Cambodia, mainly for water supply, potential carbon sink, and cultural services**



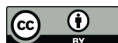

Move this to the Intro

(Jacobson et al., 2022). It is the origin of the Khmer Empire and contains numerous archaeological sites. The stream water from the mountain is not only used to support local livelihoods in water supply and irrigation downstream (Somaly et al., 2020). It is also the primary water source to recharge surface water and groundwater aquifers in the Angkor Wat, UNESCO World Heritage Site. Hence, the area is of high importance to ensure that the temples' foundations remain stable and maintain their surrounding forest ecosystem (Peou et al., 2016). However, previous studies revealed that the forestland in and around Kulen has been disturbed (Chim et al., 2019). The three main land-cover classes on Kulen are [1] nearly intact tropical evergreen forests (EF), [2] forests that regrow naturally after clear-cutting (RF) and [3] household-scale cashew plantations (CP). Approximately 60 % of Kulen is today covered by cashew plantations, another 13 % consists of forestland, while the remainder comprises other land-cover classes (Singh et al., 2019).

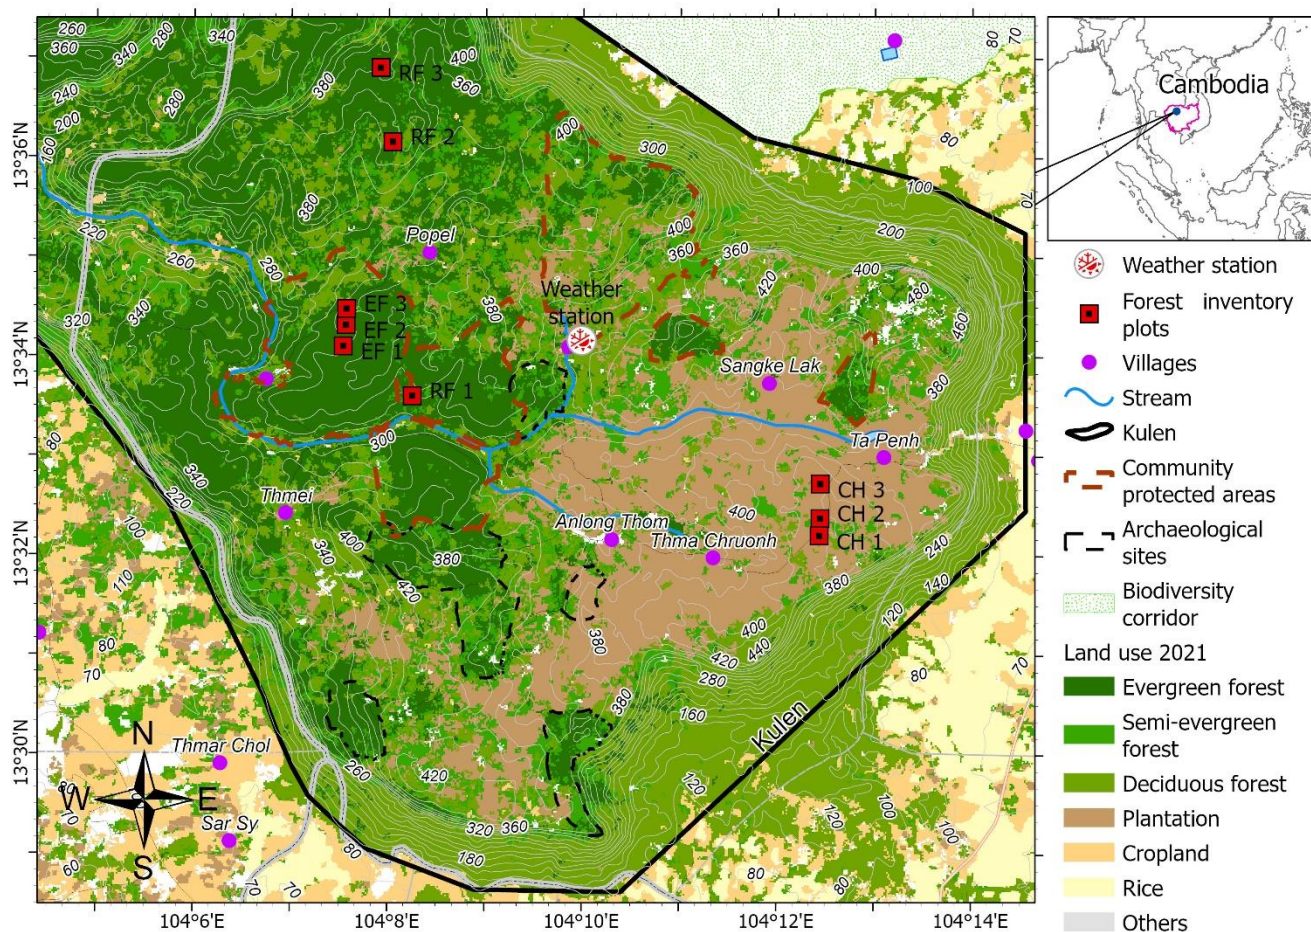

85

**Figure 1. The locations of the nine forest inventory plots and the meteorological station in the Phnom Kulen National Park, Cambodia. Note: the background land use 2021 was derived from SERVIR-Mekong (2024).**

Nine forest inventory plots were established in Kulen in December 2020, three within each of the EF, RF, and CP land-cover classes (Fig. 1), with a minimum separation of 250 meters to capture stand structure variation for each land-cover class. The

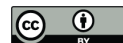

90 EF plots represented tropical evergreen forests with no clear-cut history. The RF plots were dominated by at least 10 year old natural regrowth forests, RF1 was clear-cut in 2009, while RF2 and RF3 experienced timber harvesting and burning in 2006, with human disturbances continuing until 2013. The CP plots were permanent rainfed cashew plantations, with cashew trees planted in 2013 in CP1 and in 2012 for the other two. For additional plot characteristics, including photographs, locations, elevations, slopes, meteorological conditions, soil types, and geological types, see Table S1.1 and Fig. S1.1.

## 95 2.2 Data collection

### 2.2.1 Forest inventory

The forest inventory was performed by following the standard method of the National Forest Inventory of Cambodia (Than et al., 2018). Each plot was designed as a rectangle with 50 m x 30 m long edges in the south-north and west-east directions. The plots were further subdivided into five subplots with the following dimensions: 2 m x 2 m, 5 m x 5 m, 10 m x 10 m, 30 m x 100 15 m, and 30 m x 50 m (Fig. S1.2). In the 2 m x 2 m subplots, seedlings with diameters at breast height (*DBH*, 1.3 m above ground) of less than 1 cm were recorded. In the 5 m x 5 m, 10 m x 10 m, 30 m x 15 m, and 30 m x 50 m subplots, trees with *DBH* ranges of 1–5 cm, 5–15 cm, 15–30 cm, and greater than 30 cm were measured, respectively.

For seedlings, we only recorded the total numbers of each species. For the *DBH* range of 1–5 cm, we noted the *DBH*, tree height (*H*), species, local name (Khmer), and position of each tree. For trees with a *DBH* greater than 5 cm, we collected the 105 same data as for trees with a *DBH* of 1–5 cm, plus bole height (the height from the ground to the first main lowest stem), health (healthy or infected), quality (straight, bent, or crooked stem), origin (natural or planted), and stump diameter and height (measured 15 cm above ground for annual tree growth monitoring).

Deadwood is a significant indicator of decomposition and nutrient cycling processes in a forest ecosystem (Shannon et al., 2022). Data on lying and standing deadwood with a *DBH* greater than 10 cm in the 30 m x 15 m subplots were also collected. 110 The deadwood decomposition levels were classified into five scales, based on harmonizing the scaling systems of the National Forest Inventory of Sweden (Swedish NFI, 2019) and Cambodia (Than et al., 2018) (Table S1.2). For standing deadwood, we recorded their species, local name, location, height, and decomposition level. For lying deadwood, we counted the number of pieces and measured their lengths, base and tree diameters, and decomposition levels.

### 2.2.2 Leaf sample collection and measurement

115 A total of 453 leaf samples from 30 woody species were collected inside and 500 m around the forest inventory plots in December 2019 and August 2022. Each species was represented by five to 47 leaf samples. Each leaf's fresh mass, chlorophyll content, and photo were taken in the field. A Chlorophyll Meter (SPAD 502 Plus; Konica Minolta Sensing Inc., Japan) was used in situ to measure chlorophyll content five times on each leaf surface to retrieve a leaf mean value. The given measurement unit was in SPAD value (Soil Plant Analysis Development) and later converted to chlorophyll a and b content (*Chl*) in  $\mu\text{g cm}^{-2}$  (Coste et al., 2010). We obtained fresh leaf mass by weighting in the field and leaf dry mass by oven-drying the leaves at 60 120



°C until the leaf mass remained constant (oven-dried for at least three days) (Garnier et al., 2001). The leaf photos were used for estimating leaf lengths and areas using ImageJ (Schindelin et al., 2012; Schneider et al., 2012).

### 2.2.3 Meteorological and photosynthetically active radiation data

A meteorological station was installed in an open area to continuously record meteorological conditions, and incoming photosynthetically active radiation (*PAR*) for the wider area (the Kulen National Park). Data were sampled at one minute intervals and stored as 15 minute averages (sum for rainfall). The installation was done in November 2020 in Khnang Phnom Commune, Svay Luer District, Siem Reap Province, at 13° 34' 16.1148" N, 104° 9' 45.6768" E, and an altitude of 314 m above mean sea level. The station has one Atmos 41 meteorological station (Meter Group Inc. WA, USA), installed 2.2 m above ground level, measuring rainfall, wind speed, wind direction, global radiation, atmospheric pressure, and air temperature. Additionally, four *PAR* sensors (SQ-110-SS, Apogee Instruments, Inc., UT, USA) were positioned 2 m above the ground to record incoming *PAR* ( $PAR_{inc}$ ) (Fig. S2.1).

Six additional loggers with five *PAR* sensors (SQ-521-SS and SQ-110-SS, Apogee Instruments, Inc., UT, USA) and one TEROS 12 soil moisture sensor each (Meter group Inc. WA, USA), collecting data at a 15 minute mean timestep, were installed in six of the forest inventory plots in April 2022. The soil moisture sensors were installed at a depth of 20 cm to measure soil water content (*SWC*), soil temperature (*T<sub>s</sub>*), and soil electrical conductivity (*EC<sub>s</sub>*). Two loggers were placed in each land-cover class (EF, RF, and CP). The selection of plots in each land-cover class was based on previous measurements of leaf area index (*LAI*) and the loggers were placed at the plots with the highest and lowest *LAI* for each land cover, respectively. Thus, the selected plots for installing *PAR* sensors were EF1, EF3, RF1, RF3, CP2, and CP3 (Fig. 1). The *PAR* sensors were placed with one in the centre of the plot and the other four placed  $15 \pm 1$  m apart at 30°, 150°, 220°, and 330° from the north. In cases of unfavourable field conditions, such as high termite nests or being too close to a tree, the locations were adjusted 0.5–1 m east or west of the planned position. Each *PAR* sensor was mounted on 1.3 m poles to record *PAR* below canopy data. We calculated the fraction of *PAR* intercepted by the stand canopy (*fPAR*) for each plot using Eq. (1) (Olofsson and Eklundh, 2007). Each TEROS 12 soil moisture sensor was installed at a depth of 20 cm in the middle of the six plots to measure *SWC*, *T<sub>s</sub>*, and *EC<sub>s</sub>*. The data of *fPAR* and soil conditions from two plots within the same land-cover classes were averaged to represent those classes.

$$fPAR = \frac{(PAR_{inc} - PAR_{below})}{PAR_{inc}} \quad (1)$$

Where  $PAR_{inc}$  and  $PAR_{below}$  are photosynthetically active radiation above and below canopy ( $\mu\text{mol m}^{-2} \text{s}^{-1}$ ). *fPAR* is in percentage.

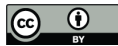

## 2.2.4 Leaf area index measurements

We measured each plot's total one-sided leaf surface area per unit ground area,  $LAI$ , using a LAI-2000 Plant Canopy Analyzer (LI-COR, NE, USA). The measurements were conducted six times across two seasons: four times during the dry season (November/December 2019, November 2020, December 2020, and March 2021) and twice during the rainy season (September 2020 and June 2021). The measurements were taken both at ground level to capture the total  $LAI$  ( $LAI_T$ ) and at breast height to specifically assess tree canopy  $LAI$  ( $LAI_C$ ) within two diagonal transects across the 50 m x 30 m rectangular plots. On each measurement occasion, we collected between 32 and 75 samples, except for the ground-level measurements of the RF3 plot in December 2020, where only ten samples were collected due to technical issues.

## 2.3 Data analysis

### 2.3.1 Species diversity

We investigated the species diversity of various land covers by calculating species richness ( $S_R$ ) and the Shannon-Wiener index ( $S_H$ ) (Shannon, 1948). The  $S_R$  was determined by summing the number of tree species in each plot. The  $S_H$  is commonly used to quantify species richness and evenness in a community by representing the number of species and how equally individuals are distributed among them (Hill, 1973). The value of  $S_H$  increases as the number of species and the degree of evenness increase. The  $S_H$  was calculated by:

$$S_H = - \sum_{i=1}^n P_i \ln(P_i) \quad (2)$$

Where  $S_H$  is Shannon-Wiener index (unitless),  $P_i$  is a proportion of  $i$  species in a community (unitless), and  $n$  is the number of species in a plot (unitless). We calculated the  $S_R$  and  $S_H$  at the plot level and then averaged the values for each land-cover class.

### 2.3.2 Functional traits and diversity

We computed the specific leaf area ( $SLA$ ) for each of the 453 leaf samples as the ratio of leaf area to leaf dry mass. Likewise, leaf dry matter content ( $LDMC$ ) was calculated by the ratio of dry leaf mass to fresh leaf mass (Garnier et al., 2001; Akram et al., 2023). We estimated the trait community-weighted means and standard deviations of  $SLA_{cwm}$ ,  $LDMC_{cwm}$ , and  $Chl_{cwm}$  to represent ecosystem functions and their diversity at the land-cover level (Garnier et al., 2004; Leoni et al., 2009; Wang et al., 2020) with:

$$T_{cwm} = \frac{\sum_{i=1}^n W_i T_i}{\sum_{i=1}^n W_i} \quad (3)$$



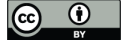

Where  $T_{cwm}$  is trait community-weighted mean for  $SLA$ ,  $LDMC$ , or  $Chl$ ,  $T_i$  is the species-specific trait value tree  $i$ ,  $n$  is total number of trees,  $W_i$  is the weight (volume based) value of the tree, assuming that larger trees have a greater impact on the ecosystem function (Chave et al., 2005; Feldpausch et al., 2011). Before computing  $T_{cwm}$  for each trait, we addressed missing species traits within each plot by first taking values from a different plot with the same land-cover class. If unavailable, we sought values from the same species across all nine plots. If neither was available, we used the mean trait value of the plot.

### 2.3.3 Stand structural attributes

We examined the differences in  $DBH$ ,  $H$ , basal area ( $BA$ ), aboveground biomass ( $AGB$ ), and deadwood biomass ( $DWB$ ) for the various land-cover classes to characterize stand structure attributes. Deadwood volumes ( $V_{DW}$ ,  $m^3$ ) for each bole were determined by Smalian's equation:

$$V_{DW} = (\pi H_b) \frac{(D_{base}^2 + D_{top}^2)}{8} \quad (4)$$

Where  $D_{base}$  and  $D_{top}$  are diameters at base and top (m), and  $H_b$  is the length/height of the trunk (m).

Deadwood biomass was then received by multiplying  $V_{DW}$  with a mean deadwood density of  $0.45 \text{ g cm}^{-3}$  (Kiyono et al., 2007). Total  $DWB$  was computed plot-wise by taking the sum of lying and standing  $DWB$ .  $DWB$  for each land-cover class was calculated as the average of the total  $DWB$  across the plots within that land-cover class.

Basal area was determined plot-wise by combining the  $DBH$  of all living trees within a plot:

$$BA = \sum_{i=1}^n \pi \left( \frac{DBH_i}{2} \right)^2 \left( \frac{10^4}{A_i} \right) \quad (5)$$

Where  $BA$  is a plot-wise total basal area of all living trees ( $m^2 \text{ ha}^{-1}$ ),  $n$  is a number of trees in a plot,  $DBH_i$  is the diameter at breast height of tree  $i$  in a sampling plot (m),  $\pi \left( \frac{DBH_i}{2} \right)^2$  is the circle basal area of tree  $i$  ( $m^2$ ),  $\left( \frac{10^4}{A_i} \right)$  are the scaling factors employed to convert the sampled subplot area ( $A_i$ ) to one hectare (unitless). The  $BA$  for each land-cover class was represented by the mean  $BA$  of all plots within a class.

We calculated the mean and standard deviation of  $DBH$  and  $H$  for each plot and land cover. We further used these for establishing relationships between  $DBH$  and  $H$ , as such relationships serve as functional traits characterizing tree growth patterns and successional stages within forest communities (Nyirambangutse et al., 2017; Howell et al., 2022). We used natural logarithms and then converted them to power-law relationships both plot- and land-cover class-wise (West and Brown, 2005). An ordinary least-square linear regression (OLS) was applied to investigate the  $DBH$ - $H$  relationship, followed by transforming the relationship into a power-law relationship (Huxley, 1932).





$$H = K_1 DBH^{K_2} \quad (6)$$

Where  $K_1$  and  $K_2$  are the power-law intercept and slope, respectively. The  $K_1$  captures the overall scaling relationship between  $H$  (m) relative to  $DBH$  (cm) within a forest community while  $K_2$  regulates the rate of  $H$  increase relative to  $DBH$  growth.

The obtained  $K_1$  and  $K_2$  values were further used to estimate  $AGB$  ( $AGB_h$ ) Eq. (7) in Table 1. We also computed the  $AGB$  using existing equations (Table 1, Eqs. (9–11)) ( $AGB_f$ ) adopted for the three different land-cover classes. These EF and RF allometric equations were developed for tropical multiple species, whereas the CP was a species-specific allometric equation for the cashew tree ((Malimbwi et al., 2016). The wood density ( $WD$ ) values required for the  $AGB$  estimations were species-specific and obtained from The International Council for Research in Agroforestry (2022) and Zanne et al. (2009). When multiple  $WD$  values for a tree species were available, the mean value was used, whereas when no species-specific  $WD$  values were available, the average of tropical Asia ( $0.57 \text{ g cm}^{-3}$ ) was used (Reyes et al., 1992). The applied  $WD$  values for this study then ranged from  $0.39\text{--}1.04 \text{ g cm}^{-3}$ . Specifically, the  $WD$  values (mean  $\pm$  a standard deviation) for EF, RF, and CP were  $0.74 \pm 0.17 \text{ g cm}^{-3}$ ,  $0.72 \pm 0.15 \text{ g cm}^{-3}$ , and  $0.45 \text{ g cm}^{-3}$ , respectively. We first estimated  $AGB$  at the plot level in kilograms, then scaled these values to megagrams per hectare, and averaged per land-cover class.

**Table 1. Allometric equations used for estimating aboveground biomass ( $AGB$ ,  $\text{kg tree}^{-1}$ ) in the different land-cover classes.**

| No. | Equations | Land cover | $AGB$ allometric equations                            | Regions           | n   | $DBH$ (range, cm) | $\overline{WD}_f$ (mean $\pm$ SD, $\text{g cm}^{-3}$ ) | References             |
|-----|-----------|------------|-------------------------------------------------------|-------------------|-----|-------------------|--------------------------------------------------------|------------------------|
| 1   | Eq. (7)   | All        | $AGB_h = \frac{WD \pi K_1}{8} DBH^{2+K_2} + \epsilon$ | -                 | -   | -                 | -                                                      | This study             |
| 2   | Eq. (8)   | All        | $AGB_{wd} = \frac{WD}{WD_f} AGB_f$                    | -                 | -   | -                 | -                                                      | This study             |
| 3   | Eq. (9)   | EF         | $AGB_f = 0.1184 DBH^{2.53}$                           | Pantropical       | 170 | 5.0–148.0         | $0.58 \pm 0.02$                                        | Brown (1997)           |
| 4   | Eq. (10)  | RF         | $AGB_f = 0.0829 DBH^{2.43}$                           | Sarawak, Malaysia | 136 | 0.1–28.7          | $0.38 \pm 0.07$                                        | Kenzo et al. (2009)    |
| 5   | Eq. (11)  | CP         | $AGB_f = 0.8450 DBH^{1.77}$                           | Pwani, Tanzania   | 45  | 6.0–89.9          | 0.18                                                   | Malimbwi et al. (2016) |

**Note:** EF is evergreen forests, RF is regrowth forests, CP is cashew plantations. In Eqs. (9–11),  $DBH$  is diameter at breast height (cm), and  $\overline{WD}_f$  is the reported mean wood density used in  $AGB_f$  ( $\text{kg m}^{-3}$ ). In Eq. (7),  $K_1$  and  $K_2$  are derived power-law intercept and slope values between  $DBH$  (cm) and tree height ( $H$ , m) relationship in Eq. (6),  $\epsilon$  is a statistical error term,  $WD$  is wood density for each tree species ( $\text{g cm}^{-3}$ ), and  $DBH$  is in centimetres. In this study, in Eq. (7), we employed a trunk shape factor of  $1/8$  for calculating the volume of frustum cones, as proposed by King et al. (2006). This factor falls within the range of  $1/4$  (cylinder volumes) to  $1/12$  (cone volumes). In Eq. (8),  $AGB_{wd}$  is our examined aboveground biomass based on equations Eqs. (9–11) with species-specific wood density updated for our woody tree species,  $WD$  are the species-specific wood density of trees in each plot ( $\text{g cm}^{-3}$ ).

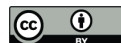

### 2.3.4 Statistical analysis

Descriptive statistics were conducted to examine the difference in ecosystem characteristics between plots and land-cover classes. One-way ANOVA tests (ANOVA) were used to assess significant differences in mean values across land-cover classes. Tukey's Honestly Significant Difference test (Tukey HSD) was further employed for pairwise comparisons between  
220 land-cover classes. Pearson correlation and ordinary least squares regression analyses were used to explore relationships between variables. All analyses were performed using R 4.2.3 (R Core Team, 2023).

## 3 Results

### 3.1 Meteorological conditions

The observed annual daily mean air temperature from April 2022 to April 2023 at Kulen meteorological station was  $24.2 \pm$   
225  $2.0$  °C, varying between  $17.8$  °C and  $28.6$  °C (Fig. 2a). The total annual rainfall was 2290 mm, significantly surpassing nearby lowland stations: Banteay Srei station, located 22 km west, recorded 1160 mm, and Siem Reap City station, situated 40 km southwest, recorded 1475 mm (Chim et al., 2021). About 90 % of the annual precipitation fell during the rainy season from May to November, with September being the wettest month (505 mm). The daily maximum rainfall can reach up to 141 mm, but the daily mean during the rainy season was  $11.2 \pm 19.7$  mm (Fig. 2b). The annual daily mean of global radiation, relative  
230 humidity, vapour pressure deficit, and wind speed were  $172 \pm 44$  W m<sup>-2</sup>,  $88 \pm 12$  %,  $0.45 \pm 0.21$  kPa, and  $0.68 \pm 0.22$  m s<sup>-1</sup>, respectively (Fig. 2c–f).

For the different land-cover classes, daily mean soil water content ranged between  $0.14$ – $0.23$  m<sup>3</sup> m<sup>-3</sup>, soil temperature between  $24.2$ – $25.8$  °C, and soil electrical conductivity between  $0.025$ – $0.039$  dS m<sup>-1</sup> (measured at 20 cm depth, Fig. 2g–i). In particular, the mean  $T_s$  at CP ( $25.8 \pm 1.5$  °C) was significantly higher than for EF ( $24.3 \pm 1.2$  °C) and RF ( $24.2 \pm 1.3$  °C), whereas the  
235 mean  $SWC$  was significantly lower in RF ( $0.14 \pm 0.03$  m<sup>3</sup> m<sup>-3</sup>) compared to EF ( $0.23 \pm 0.06$  m<sup>3</sup> m<sup>-3</sup>) and CP ( $0.21 \pm 0.05$  m<sup>3</sup> m<sup>-3</sup>) (Table 2). Additionally, EF had higher  $EC_s$  ( $0.039$  dS m<sup>-1</sup>) than RF and CP ( $0.032$  dS m<sup>-1</sup>,  $0.025$  dS m<sup>-1</sup>) (p-value < 0.001), indicating higher salinity levels in the soil.

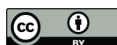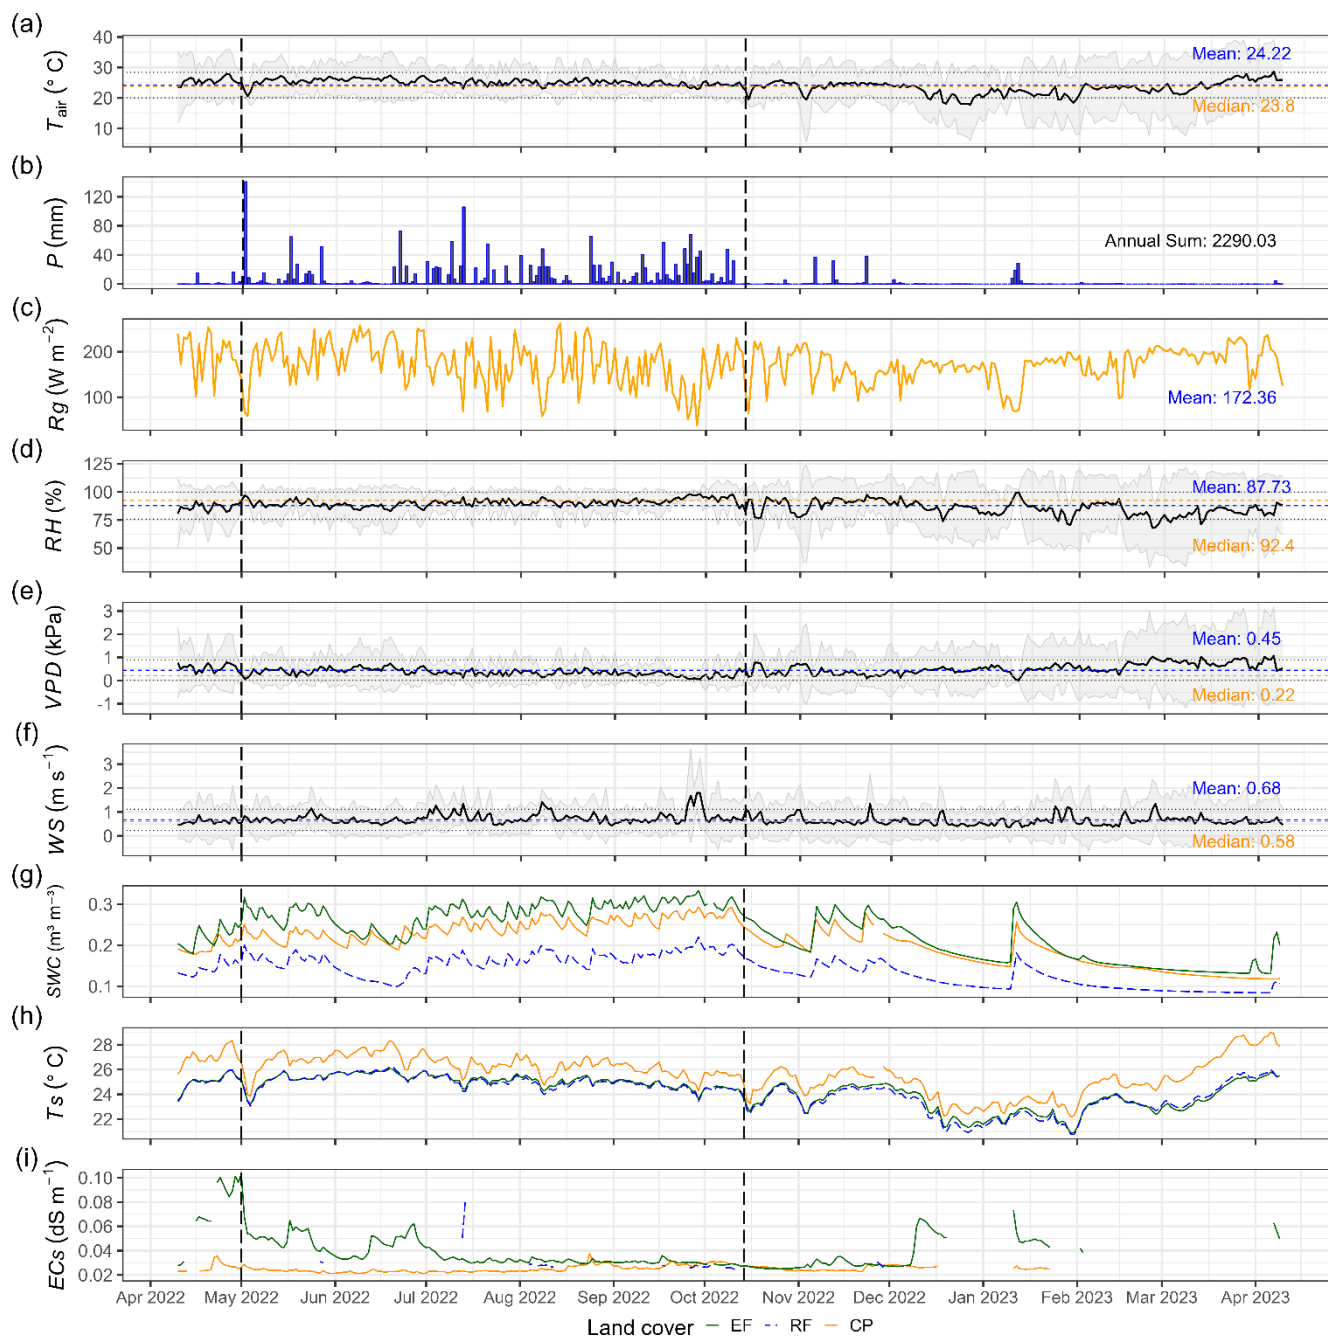

240 **Figure 2. The meteorological conditions at Kulen meteorological station (a–f), and soil conditions at each land-cover class (g–i) from**  
**April 10, 2022, to April 9, 2023. (a) Daily mean air temperature ( $T_{\text{air}}$ , °C), (b) daily total precipitation ( $P$ , mm), (c) daily mean global**  
**radiation ( $R_g$ ,  $\text{W m}^{-2}$ ), (d) daily mean relative humidity ( $RH$ , %), (e) daily mean vapour pressure deficit ( $VPD$ , kPa), and (f) daily**  
**mean wind speed ( $WS$ ,  $\text{m s}^{-1}$ ), (g) daily mean soil water content ( $SWC$ ,  $\text{m}^3 \text{m}^{-3}$ ), (h) daily mean soil temperature ( $T_s$ , °C), (i) daily**  
 245 **mean soil saturation extraction electrical conductivity ( $EC_s$ ,  $\text{dS m}^{-1}$ ). The vertical dashed line region in all the plots highlighted the**  
**rainy season period in Cambodia from May to October. The grey-shaded regions around the mean in (a), (d), (e), and (f) represent**  
**the 95 % confidence interval (using a standard deviation) from the daily mean, whereas the blue horizontal dashed line represents**



250

the yearly mean, the brown horizontal dashed line represents the yearly median, and the black horizontal dotted line represents a yearly standard deviation (see Table S2.1 and Fig. S2.2 present the Kulen meteorological station's annual and monthly meteorological data. Figs. S3.1–S3.3 shows monthly mean soil conditions by land-cover class, and Fig. S4.1 depicts correlations between meteorological and soil conditions).

### 3.2 Species diversity

255

A total of 343 observations (292 trees and 51 seedlings) from 47 woody species (including 13 seedling species) and 32 families (including seven seedling families) were identified from the nine plots (Table S5.1). The average species richness ( $S_R$ ) per plot for the EF, RF, and CP were 17, 13, and 4, respectively. The top five dominant species in EF accounted for 46 % of the individuals: (*Mesua ferrea* ( $n = 18$ ), *Diospyros bejaudii* ( $n = 12$ ), *Litchi chinensis* ( $n = 11$ ), *Vatica odorata* ( $n = 11$ ), and *Hydnocarpus annamensis* ( $n = 8$ )). In RF, the most dominant species were *Vatica odorata* ( $n = 54$ ), *Nephelium hypoleucum* ( $n = 14$ ), *Benkara fasciculata* ( $n = 12$ ), *Garcinia oliveri* ( $n = 12$ ), and *Mesua ferrea* ( $n = 5$ ), comprising 61 % of individuals. Naturally, within the CP, the most abundant species was *Anacardium occidentale* ( $n = 46$ ), the only species found when excluding seedlings. Among seedlings, except for *Anacardium occidentale*, we also found *Strychnos axillaris* ( $n = 3$ ),

260

*Nephelium hypoleucum* ( $n = 1$ ), *Melodorum fruticosum* ( $n = 1$ ), *Maclura cochinchinensis* ( $n = 1$ ), and *Catunaregam tomentosa* ( $n = 1$ ). Furthermore, fast-growth species, as described by Ha (2015) ( $WD < 0.6 \text{ g cm}^{-3}$ ), accounted for 40 % of EF and 44 % of RF of their total species composition.

265

The Shannon–Wiener index ranged from 0.31–2.68 across all plots, with the highest and lowest values observed in EF1 and CP2 (Table S5.2). EF showed the highest mean  $S_H$  ( $2.48 \pm 0.33$ ), followed by RF ( $1.97 \pm 0.45$ ), whereas CP was dominated by *Anacardium occidentale*, and thus it has a very low  $S_H$  ( $0.61 \pm 0.46$ ).

**Table 2. Mean values and statistics of ecosystem characteristics in the different land-cover classes.**

| Group             | Variables                                        | Land cover  |   |             |   |             |   | Tukey HSD |         |         |         |
|-------------------|--------------------------------------------------|-------------|---|-------------|---|-------------|---|-----------|---------|---------|---------|
|                   |                                                  | EF          |   | RF          |   | CP          |   | A         | N       | O       | V       |
|                   |                                                  | (Mean ± SD) | n | (Mean ± SD) | n | (Mean ± SD) | n | p-value   | p-value | p-value | p-value |
| Species diversity | $S_R$ (with seedling species, count per plot)    | 17 ± 4      | 3 | 13 ± 2      | 3 | 4 ± 3       | 3 | -         | -       | -       | -       |
|                   | $S_R$ (without seedling species, count per plot) | 13 ± 2      | 3 | 10 ± 3      | 3 | 1 ± 0       | 3 | -         | -       | -       | -       |
|                   | $S_H$ (with seedling species, unitless)          | 2.48 ± 0.33 | 3 | 1.97 ± 0.45 | 3 | 0.61 ± 0.46 | 3 | -         | -       | -       | -       |



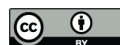

|                                                                  |                                                              |                |               |                |               |                |     |      |      |      |      |
|------------------------------------------------------------------|--------------------------------------------------------------|----------------|---------------|----------------|---------------|----------------|-----|------|------|------|------|
| Leaf functional traits                                           | $Chl_{cwm}$ (mg g <sup>-1</sup> )                            | 9.14 ± 3.45    | 109           | 7.56 ± 2.03    | 137           | 4.99 ± 0.66    | 46  | *    | *    | 0.39 | 0.08 |
|                                                                  | $LDMC_{cwm}$ (mg g <sup>-1</sup> )                           | 398.43 ± 72.24 | 109           | 370.12 ± 94.96 | 137           | 407.64 ± 21.68 | 46  | 0.52 | 0.50 | 0.93 | 0.70 |
|                                                                  | $SLA_{cwm}$ (m <sup>2</sup> kg <sup>-1</sup> )               | 18.18 ± 2.86   | 109           | 14.88 ± 2.06   | 137           | 11.99 ± 1.45   | 46  | **   | **   | *    | 0.06 |
| Stand structures                                                 | $DBH$ (cm)                                                   | 18.0 ± 20.1    | 109           | 5.8 ± 4.3      | 137           | 13.0 ± 3.9     | 46  | ***  | 0.14 | ***  | ***  |
|                                                                  | $H$ (m)                                                      | 17.0 ± 13.3    | 109           | 7.4 ± 3.8      | 137           | 6.3 ± 1.0      | 46  | ***  | ***  | ***  | 0.93 |
|                                                                  | Maximum $H$ (m)                                              | 52.0           | 109           | 18.6           | 137           | 7.8            | 46  | -    | -    | -    | -    |
|                                                                  | Wood density (g cm <sup>-3</sup> ) <sup>†</sup>              | 0.74 ± 0.17    | 109           | 0.72 ± 0.15    | 137           | 0.45 ± 0.00    | 46  | ***  | ***  | 0.56 | ***  |
|                                                                  | Stem density $DBH > 1$ cm (ha <sup>-1</sup> ) <sup>††</sup>  | 6216 ± 2177    | 3             | 10859 ± 4999   | 3             | 1067 ± 440     | 3   | -    | -    | -    | -    |
|                                                                  | Stem density $DBH > 5$ cm (ha <sup>-1</sup> ) <sup>††</sup>  | 1016 ± 533     | 3             | 2193 ± 895     | 3             | 1067 ± 440     | 3   | -    | -    | -    | -    |
|                                                                  | Stem density $DBH ≥ 10$ cm (ha <sup>-1</sup> ) <sup>††</sup> | 550 ± 505      | 3             | 293 ± 6        | 3             | 600 ± 164      | 3   | -    | -    | -    | -    |
|                                                                  | $BA$ (m <sup>2</sup> ha <sup>-1</sup> )                      | 26 ± 4         | 3             | 17 ± 5         | 3             | 12 ± 4         | 3   | -    | -    | -    | -    |
|                                                                  | $BA$ (m <sup>2</sup> ha <sup>-1</sup> , $DBH ≥ 5$ cm)        | 24 ± 4         | 3             | 12 ± 2         | 3             | 12 ± 3         | 3   | -    | -    | -    | -    |
|                                                                  | $BA$ (m <sup>2</sup> ha <sup>-1</sup> , $DBH ≥ 10$ cm)       | 21 ± 4         | 3             | 4 ± 1          | 3             | 9 ± 1          | 3   | -    | -    | -    | -    |
|                                                                  | $DWB$ (Total) (Mg ha <sup>-1</sup> )                         | 27.5 ± 12.4    | 3             | 4.8 ± 7.0      | 3             | 0.4 ± 0.2      | 3   | -    | -    | -    | -    |
|                                                                  | $AGB_t$ (Mg ha <sup>-1</sup> )                               | 239 ± 92       | 3             | 42 ± 10        | 3             | 71 ± 22        | 3   | -    | -    | -    | -    |
|                                                                  | $AGB_{wd}$ (Mg ha <sup>-1</sup> )                            | 336 ± 168      | 3             | 78 ± 25        | 3             | 182 ± 57       | 3   | -    | -    | -    | -    |
|                                                                  | $AGB_h$ (Mg ha <sup>-1</sup> )                               | 312 ± 184      | 3             | 54 ± 14        | 3             | 17 ± 5         | 3   | -    | -    | -    | -    |
|                                                                  | $LAI_C$ (m <sup>2</sup> m <sup>-2</sup> )                    | 4.62 ± 0.50    | 21            | 4.66 ± 0.70    | 21            | 2.52 ± 0.42    | 21  | ***  | ***  | 1.00 | ***  |
| $LAI_T$ (m <sup>2</sup> m <sup>-2</sup> )                        | 6.16 ± 0.67                                                  | 21             | 5.57 ± 0.76   | 21             | 3.07 ± 0.61   | 21             | *** | ***  | 0.08 | ***  |      |
| Annual mean $fPAR$ <sup>‡</sup>                                  | 0.97 ± 0.01                                                  | 364            | 0.96 ± 0.01   | 365            | 0.76 ± 0.06   | 359            | *** | ***  | *    | ***  |      |
| Annual mean $SWC$ <sup>‡</sup> (m <sup>3</sup> m <sup>-3</sup> ) | 0.23 ± 0.06                                                  | 364            | 0.14 ± 0.03   | 365            | 0.21 ± 0.05   | 363            | *** | ***  | ***  | ***  |      |
| Annual mean $T_s$ <sup>‡</sup> (°C)                              | 24.3 ± 1.2                                                   | 364            | 24.2 ± 1.3    | 365            | 25.8 ± 1.5    | 363            | *** | ***  | ***  | ***  |      |
| Annual mean $EC_s$ <sup>‡</sup> (dS m <sup>-1</sup> )            | 0.039 ± 0.015                                                | 268            | 0.032 ± 0.013 | 40             | 0.025 ± 0.003 | 260            | *** | ***  | ***  | ***  |      |

**Note:** Abbreviations used in the table: EF = evergreen forests, RF = regrowth forests, CP = cashew plantations,  $S_R$  = species richness (only woody seedling species),  $S_H$  = Shannon-Wiener index,  $Chl_{cwm}$  = community-weighted mean of chlorophyll a and b content,  $LDMC_{cwm}$  = community-weighted mean of leaf dry matter content,  $SLA_{cwm}$  = community-weighted mean of specific leaf area,  $DBH$  = tree's diameter at breast height,  $H$  = tree height,  $BA$  = stand basal area,  $AGB_t$  = aboveground biomass computed by adopted functions,  $AGB_h$  = aboveground biomass computed by  $H$  and  $DBH$  power-law relationship,  $AGB_{wd}$  = aboveground biomass based on equations Eqs. (9–11) with species-specific wood density updated for our woody tree species,  $LAI_C$  = canopy leaf area index,  $LAI_T$  = total leaf area index,  $fPAR$  = fraction of photosynthetically active radiation,  $SWC$  = soil water content,  $T_s$  = soil temperature,  $EC_s$  = soil saturation extract electrical conductivity, SD = a standard deviation, ANOVA = one-way analysis of variance, Tukey HSD = Tukey's Honestly Significant Difference test. Statistically significant code for ANOVA and Tukey HSD test: "\*\*\*\*" p-value < 0.001, "\*\*\*" p-value < 0.01, "\*\*" p-value < 0.05, and "-" not available. <sup>†</sup>The species-specific wood density was derived from the ICRAF Database (2022) and Zanne et al. (2009). <sup>††</sup>Extrapolated values for one hectare were obtained from sampling  $DBH$  class subplots. <sup>‡</sup>Daily mean values were used to calculate the reported variables.



### 280 3.3 Leaf functional traits and diversity

The mean specific leaf area for all 30 species was  $16.97 \pm 5.30 \text{ m}^2 \text{ kg}^{-1}$ , with *Hydnocarpus annamensis* having the highest *SLA* ( $36.67 \pm 5.20 \text{ m}^2 \text{ kg}^{-1}$ ) and *Capparis micracantha* the lowest ( $10.46 \pm 3.28 \text{ m}^2 \text{ kg}^{-1}$ ). For *Chl*, the mean value was  $10.28 \pm 4.17 \text{ mg g}^{-1}$ , with *Hydnocarpus annamensis* having the highest value ( $25.75 \pm 5.28 \text{ mg g}^{-1}$ ) and *Anacardium occidentale* the lowest ( $4.86 \pm 4.93 \text{ mg g}^{-1}$ ). Finally, for *LDMC* the mean value was  $378.96 \pm 143.26 \text{ mg g}^{-1}$ , with *Mesua ferrea* and *Hydnocarpus*  
285 *annamensis* having the highest ( $486.90 \pm 25.03 \text{ mg g}^{-1}$ ) and lowest ( $139.92 \pm 20.19 \text{ mg g}^{-1}$ ) values, respectively. For detailed descriptions of leaf functional traits of all species and plots, please refer to Tables S6.1–S6.3.

There were statistical differences in mean *SLA*<sub>cwm</sub> (p-value < 0.002) and *Chl*<sub>cwm</sub> (p-value < 0.018) among the three land-cover classes, whereas there was no significant difference in the mean *LDMC*<sub>cwm</sub> (p-value = 0.52) (Table 2). *SLA*<sub>cwm</sub> and *Chl*<sub>cwm</sub> were highest in EF ( $18.18 \pm 2.86 \text{ m}^2 \text{ kg}^{-1}$ , and  $9.14 \pm 3.45 \text{ mg g}^{-1}$ ) followed by RF ( $14.88 \pm 2.06 \text{ m}^2 \text{ kg}^{-1}$ , and  $7.56 \pm 2.03 \text{ mg g}^{-1}$ )  
290 and CP ( $11.99 \pm 1.45 \text{ m}^2 \text{ kg}^{-1}$ , and  $4.99 \pm 0.66 \text{ mg g}^{-1}$ ). However, for *LDMC*<sub>cwm</sub> the highest value was observed in CP, with a value of  $407.64 \pm 21.68 \text{ mg g}^{-1}$  ( $398.43 \pm 72.24 \text{ mg g}^{-1}$  for EF,  $370.12 \pm 94.96 \text{ mg g}^{-1}$  for RF). See Table S6.4 for data sources and shared percentages of species trait values used to compute *SLA*<sub>cwm</sub>, *Chl*<sub>cwm</sub>, and *LDMC*<sub>cwm</sub>.

### 3.4 Stand structure attributes

#### 3.4.1 DBH-H relationship No need to discuss every results, just focus on your key findings.

295 The 292 sampled woody trees in the nine inventory plots had a mean *DBH* of  $11.5 \pm 13.9 \text{ cm}$  and a mean *H* of  $10.8 \pm 9.8 \text{ m}$  (Fig. S7.1). The maximum *H* of 52.0 m and the maximum *DBH* of 102.3 cm were both observed in EF. RF and CP had maximum *H* of 18.6 m and 7.8 m, and maximum *DBH* of 23.1 cm and 18.8 cm respectively. Comparing land-cover classes, EF had both the highest mean and the highest variability in *DBH* ( $18.0 \pm 20.1 \text{ cm}$ ) and highest *H* ( $17.0 \pm 13.3 \text{ m}$ ), while CP had a mean *DBH* of  $13.0 \pm 3.9 \text{ cm}$ , which was double that of RF ( $5.8 \pm 4.3 \text{ cm}$ ). CP had slightly higher mean *H* values than  
300 RF, whereas RF had higher variability (RF at  $7.4 \pm 3.8 \text{ m}$ ; CP at  $6.3 \pm 1.0 \text{ m}$ ). In addition, the ANOVA confirmed statistically significant differences in mean *DBH* and mean *H* among the three land-cover classes (Table 2). The Tukey HSD test further revealed differences in mean *DBH* for RF & EF and RF & CP (p-value < 0.001), as well as in mean *H* for CP & EF and RF & EF (p-value < 0.001). In contrast, the test showed no statistically significant differences between the mean *DBH* for CP & EF (p-value = 0.14) and mean *H* for CP & RF (p-value = 0.93) (Table 2).

305 Strong positive relationships between *DBH* and *H* were observed in both EF and RF. For EF, 92 % of the variation in *H* can be explained by the variation in *DBH*, whereas for RF and CP, it was 78 % and 51 %, respectively (Table S7.1). The power-law relationships between *DBH* and *H* further indicated that the *K*<sub>1</sub> and *K*<sub>2</sub> values for EF and RF were similar, whereas the values for CP were much lower (Fig. 3). For a plot-level analysis of relationships between  $\ln(\text{DBH})$  and  $\ln(H)$ , see Fig. S7.2 and Table S7.2.

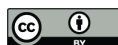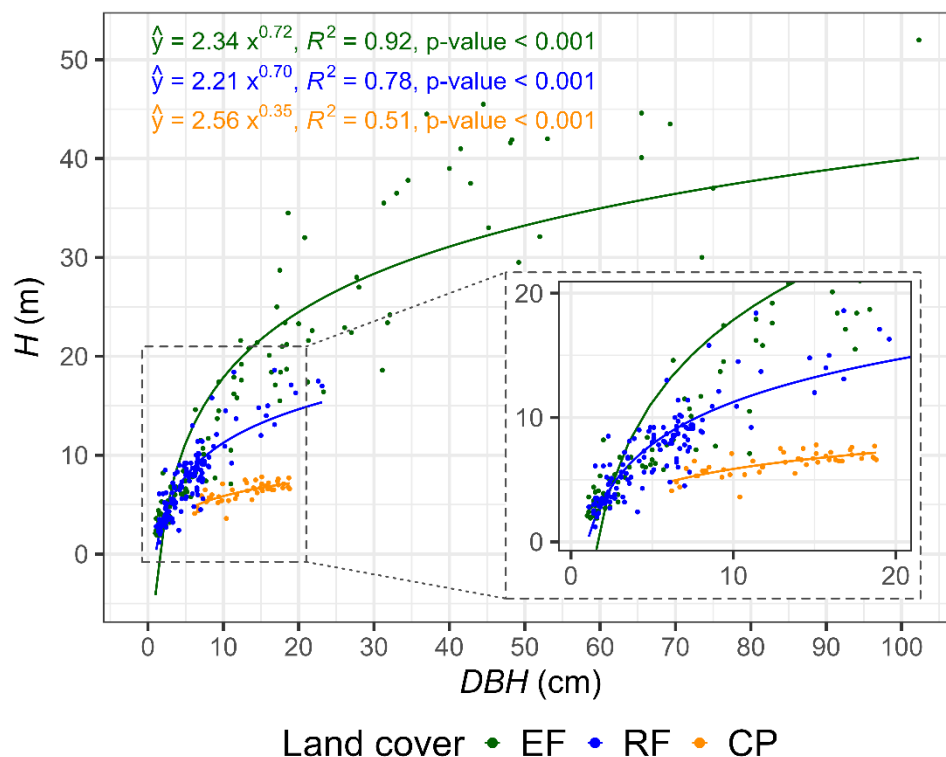

310

**Figure 3. Relationship between diameter at breast height (DBH) (cm) and tree height (H) (m) for evergreen forests (EF), regrowth forests (RF), and cashew plantations (CP) in Kulen. Figure shows the derived power-law intercept ( $K_1$ ) and slope ( $K_2$ ) values for EF, RF, and CP.**

### 3.4.2 Aboveground and deadwood biomass, stem density, and basal area

315 The  $AGB_{wd}$  method consistently yielded higher aboveground biomass across all land-cover classes compared to the  $AGB_f$  and  $AGB_h$  methods. Significant variations in estimated  $AGB$  values were observed among land-cover classes for all methods; EF had values in the range of 239–336  $Mg\ ha^{-1}$ , and RF had values in the range of 42–78  $Mg\ ha^{-1}$  (Table 2, Fig. 4). The main difference between the methods was that  $AGB_h$ , based on local scale  $K_1$  and  $K_2$  values (Table S7.2, Fig. S7.2), had substantially lower  $AGB$  for CP compared to the other two methods ( $AGB_{wd}$ :  $182 \pm 57\ Mg\ ha^{-1}$ ,  $AGB_f$ :  $71 \pm 22\ Mg\ ha^{-1}$ ,  $AGB_h$ :  $17 \pm 5\ Mg\ ha^{-1}$ , see Fig. S7.3). Further plot-level results are available in Figs. S7.4–S7.5. Additionally, the mean total  $DWB$  was  $27.5 \pm 12.4\ Mg\ ha^{-1}$  in EF,  $4.8 \pm 7.0\ Mg\ ha^{-1}$  in RF, and  $0.4 \pm 0.2\ Mg\ ha^{-1}$  in CP. See Table A1 for the contribution of lying and standing  $DWB$  to total  $DWB$ .

320

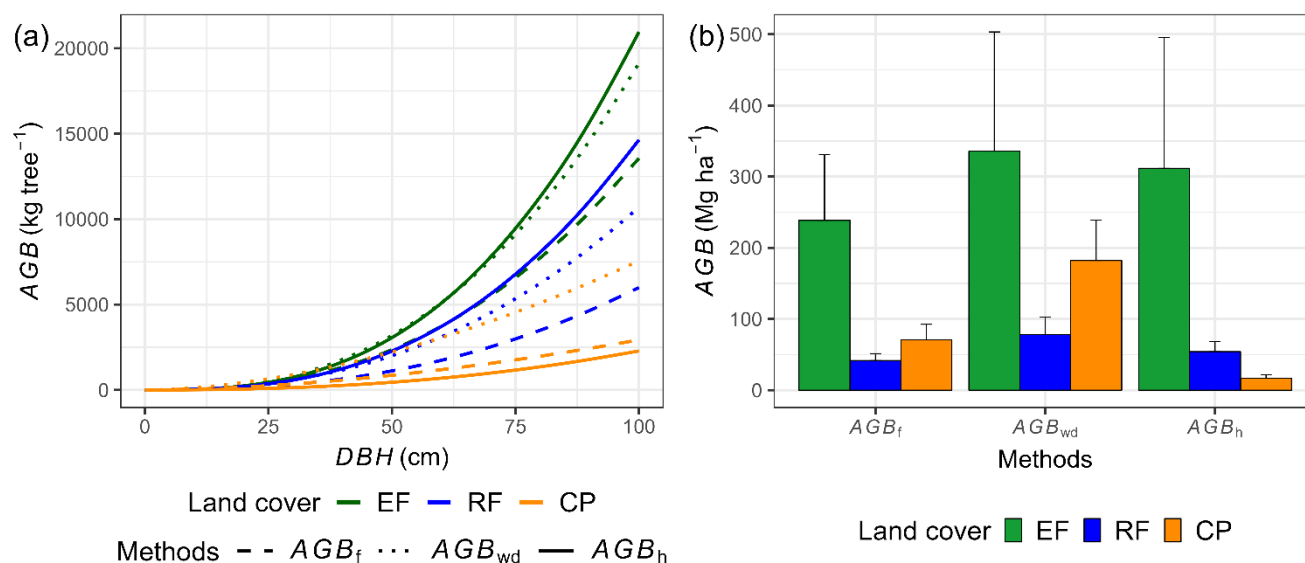

325 **Figure 4. Power-law relationships between aboveground biomass ( $AGB$ ) of  $AGB_f$ ,  $AGB_h$ , and  $AGB_{wd}$  and diameter at breast height ( $DBH$ ) for each land-cover class (a), along with the corresponding results of  $AGB$  estimation (b).  $AGB_f$  represents aboveground biomass estimated by adopted functions,  $AGB_{wd}$  represents aboveground biomass estimated by adopted functions utilizing species-specific wood density, and  $AGB_h$  represents aboveground biomass estimated by the  $DBH$  and tree height ( $H$ ) relationship, in conjunction with species-specific wood density, for the study site. The error bar in (b) represents a standard deviation.**

330 The stem density per hectare ( $DBH > 5$  cm) was twice as high in the RF compared to EF and CP (Fig. 5). This higher stem density per ha was primarily attributed to the  $DBH$  class of 5–15 cm. RF had a significantly larger  $BA$  ( $17 \pm 5$  m<sup>2</sup> ha<sup>-1</sup>) than the CP ( $12 \pm 4$  m<sup>2</sup> ha<sup>-1</sup>), despite having a smaller mean  $DBH$  (Table 2). Interestingly, only 5 % of the stems with a  $DBH > 30$  cm contributed to approximately 75 % of the total  $AGB_h$ , 234 Mg ha<sup>-1</sup> out of 312 Mg ha<sup>-1</sup>. The main  $DBH$  class contributing to the  $AGB$  in RF and CP was 5–15 cm, accounting for 62 % and 71 % of the total  $AGB$  in RF and in CP, respectively. Refer to Supplementary Table S7.3 for shared stem density percentages per hectare across  $DBH$  classes, and Table S7.4 for shared percentages of  $AGB_h$  categorized by  $DBH$  class.

335



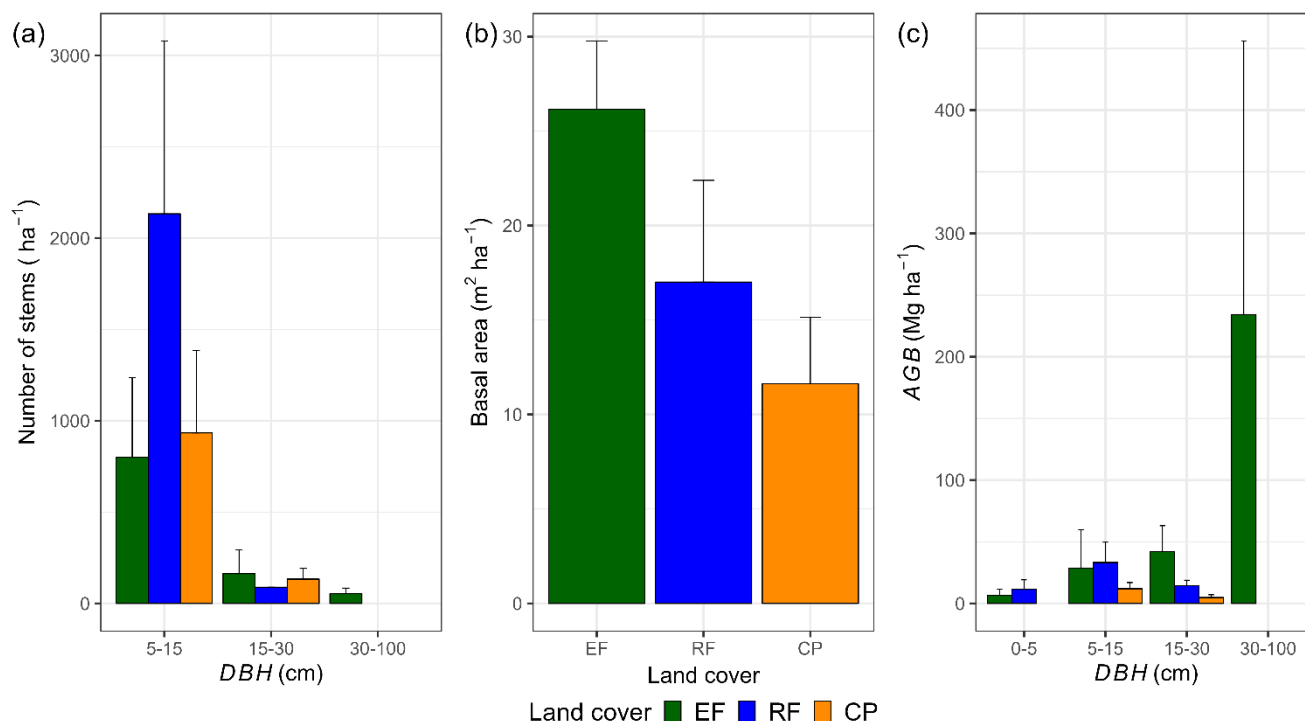

**Figure 5.** Estimations per land-cover class of a mean number of stems per hectare (a), basal area ( $BA$ ,  $m^2 ha^{-1}$ ) (b), and mean aboveground biomass separated by the different diameters at breast height ( $DBH$ ) classes (c). In (c), the contribution of different  $DBH$  classes to the mean aboveground biomass estimated by the  $AGB_h$  method was used in this calculation. The error bars in the figure represent one standard deviation.

### 3.5 LAI and fPAR

The mean total leaf area index values were  $6.16 \pm 0.67 m^2 m^{-2}$  for EF,  $5.57 \pm 0.76 m^2 m^{-2}$  for RF, and  $3.07 \pm 0.61 m^2 m^{-2}$  for CP. The mean canopy  $LAI$  values were  $4.62 \pm 0.5 m^2 m^{-2}$  for EF,  $4.66 \pm 0.70 m^2 m^{-2}$  for RF, and  $2.52 \pm 0.42 m^2 m^{-2}$  for CP.

The ANOVA analysis revealed a significant difference in mean  $LAI_T$  and mean  $LAI_C$  among the three land-cover classes, while the Tukey HSD test did not find a significant difference in mean  $LAI_T$  and mean  $LAI_C$  between EF and RF (Table 2). The phenology of both  $LAI_T$  and  $LAI_C$  revealed a similar pattern in EF and RF, with peak and base values in June and March, respectively (Fig. 6a–b, Table S8.1 in Supplementary Subsection 8 for their descriptive statistics). The  $LAI_T$  and  $LAI_C$  patterns for CP resembled those of EF and RF but also had a strong decrease in April. Furthermore, the understory  $LAI$  ( $LAI_U$ ; the difference between  $LAI_T$  and  $LAI_C$ ) for the various land-cover classes indicates that the ground vegetation highly contributes to  $LAI_T$  for EF and RF, while the contribution was minor for CP (Fig. 6c). In particular, the  $LAI_U$  mean values within a year were approximately  $1.54 \pm 0.57 m^2 m^{-2}$  for EF (25 %),  $0.91 \pm 0.36 m^2 m^{-2}$  for RF (16 %), and  $0.55 \pm 0.39 m^2 m^{-2}$  for CP (18 %). A general trend of high contribution  $LAI_U$  to  $LAI_T$  in June and low contribution in April was apparent for all land-cover classes.

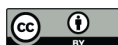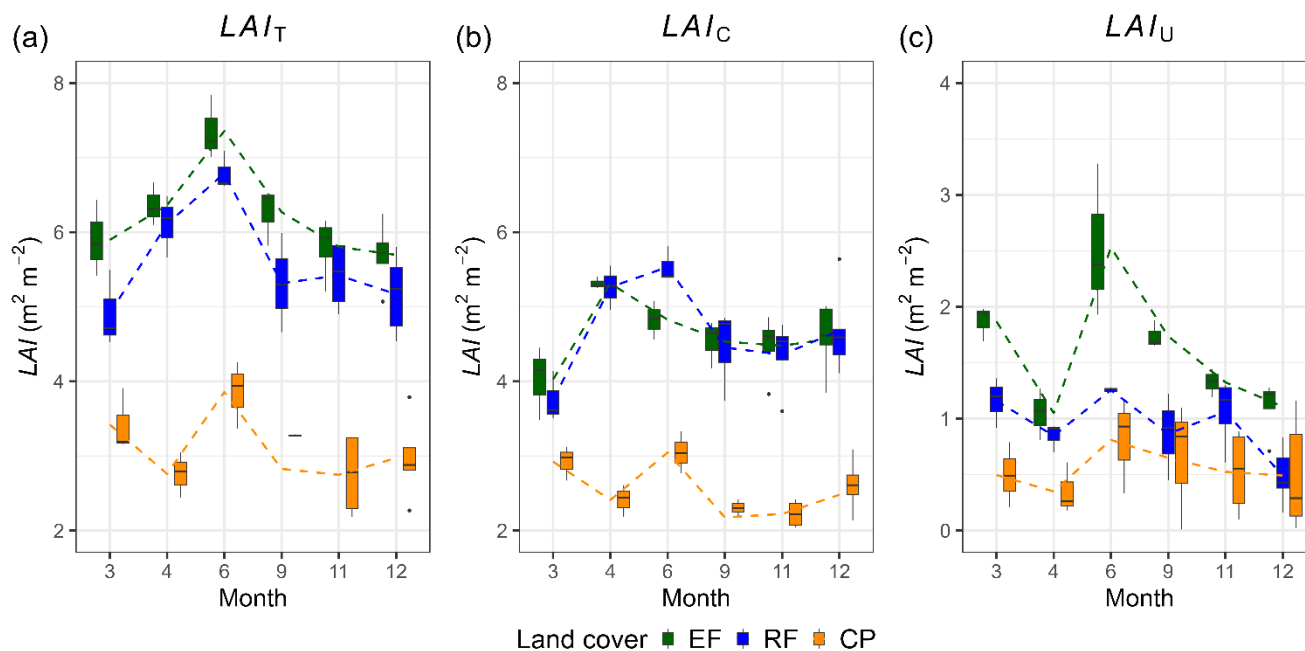

355

**Figure 6.** Total leaf area index ( $LAI_T$ ,  $m^2 m^{-2}$ ), canopy leaf area index ( $LAI_C$ ,  $m^2 m^{-2}$ ), and understory leaf area index ( $LAI_U$ ,  $m^2 m^{-2}$ ), their variations across different months within a year for evergreen forests (EF), regrowth forests (RF), and cashew plantations (CP). The lines in the graph represent the connection between the mean LAI values from one month to another.

The observed mean annual  $fPAR$  for EF, RF, and CP was high:  $0.97 \pm 0.01$ ,  $0.96 \pm 0.01$ , and  $0.76 \pm 0.06$ , respectively (Table 2). The values of EF and RF exhibited minimal fluctuations throughout the year, whereas the  $fPAR$  of CP ranged between 0.55 and 0.93 (Fig. 7). Like LAI, the annual mean  $fPAR$  among EF, RF, and CP were statistically significantly different according to both the ANOVA test and Tukey HSD's tests.

360

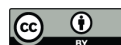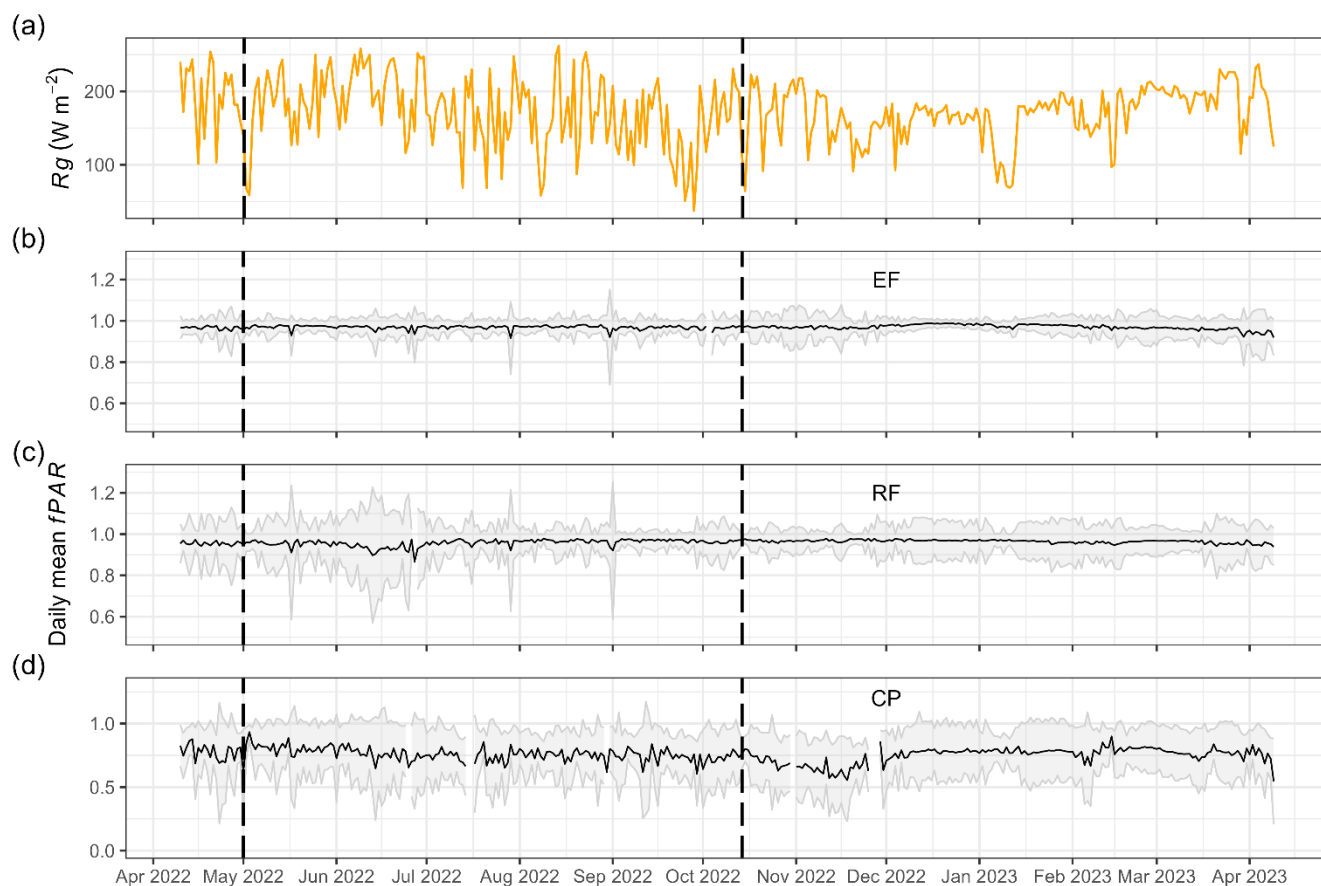

**Figure 7.** Daily mean global radiation ( $R_g$ ,  $W\ m^{-2}$ ) (a) and daily mean  $fPAR$  for evergreen forests (EF) (b), regrowth forests (RF) (c), cashew plantations (CP) (d) from April 11, 2022, to April 9, 2023 at Kulen. The shaded area represents one standard deviation from the mean, computed using the ten  $PAR$  sensors installed in each land-cover class.

365

### 3.6 $AGB_h$ relationships with $LAI_T$ , $SLA_{cwm}$ , and $S_R$

We observed positive relationships between aboveground biomass and three pivotal ecosystem characteristics:  $LAI_T$ ,  $S_R$ , and  $SLA_{cwm}$  determining 76 %, 72 %, and 68 % of the variability in  $AGB$ , respectively (Fig. 8, Table S9.1 for statistical regression tables).  $LAI_T$  exhibited strong positive correlations with  $SLA_{cwm}$ ,  $S_R$ , and  $AGB$ , with the Pearson correlation coefficient in the range of 0.67–0.85.  $SLA_{cwm}$  had a positive correlation with  $S_R$  and  $AGB$ . Furthermore, additional insights regarding the Pearson correlation matrix depicting relationships among various ecosystem characteristics are presented in Fig. S9.1.

370

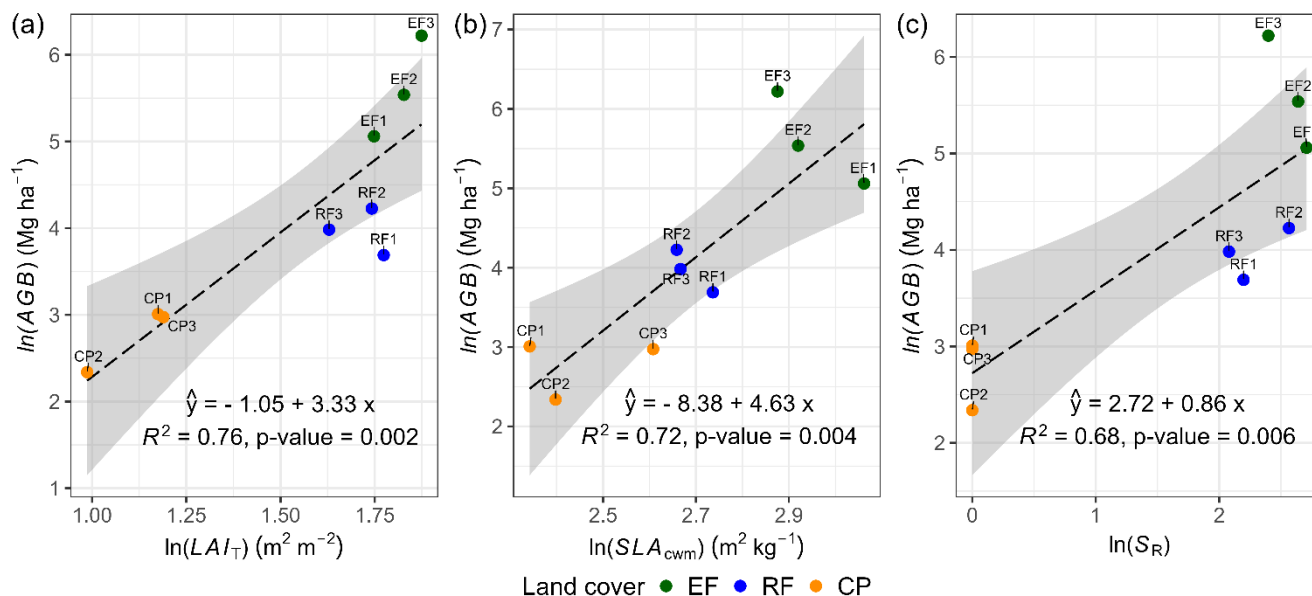

375 **Figure 8. Ordinary least squares regression showing the effect of mean total  $LAI_T$  ( $m^2 m^{-2}$ ), mean  $SLA_{cwm}$  ( $m^2 kg^{-1}$ ), and species richness ( $S_R$ , count per plot) on  $AGB$ . Mean  $LAI_T$  is a mean ground  $LAI$  measurement,  $S_R$  is a woody species count excluding seedlings in a plot, and  $AGB$  is  $AGB_h$  whose estimation was based on the  $DBH-H$  relationship.**

4 Discussions Too many subsections, I would suggest to go with three major aspects: Meteo, plant, soil. Also, maybe discuss these aspects linking with your main scientific questions (land-cover change)?

4.1 ~~Importance of tropical field data~~ No need to discuss here, you already told in the intro

380 Numerous studies have emphasised the essential role of field-observed data for empirically elucidating the complexities of tropical forest ecosystems (Fischer et al., 2016; Clark et al., 2017). These data are crucial for understanding how land-use and land-cover changes affect forest ecosystems, for assessing biodiversity, for mapping, and for quantification of ecosystem services, and for enhancing remote sensing and ecosystem modelling techniques. In our case, the observed dataset also allows for pairwise comparisons of ecosystem characteristics against the pristine conditions of the tropical evergreen forests, a

385 perspective often missing in studies focused on a single land-cover class. Given the critical issue of land conversion in Southeast Asia, where natural forests are frequently transformed into agricultural lands, our data are pivotal for studying the ecological shifts of such land cover changes. Despite not being similar to the nearby lowlands (Chim et al., 2021), the meteorological conditions at the field site are characteristic of the tropical monsoon climate of Southeast Asia (Thoeun, 2015), indicating that the conclusions drawn from field site data may represent the larger region.

#### 390 4.2 Soil conditions

The difference in soil temperature between the forested land-cover classes (EF and RF) and the cashew plantations (Table 2) aligns with prior studies by van Haren et al. (2013) and Geng et al. (2022) and can be explained by the substantial difference



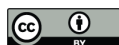

in interception of incoming radiation between these ecosystems (Fig. 6). The multi-layered canopies and the dense layer of deadwood and litterfall, effectively prevent direct sunlight from reaching the ground. This natural shield reduces the impact of global radiation, thereby maintaining cooler soil surface temperatures (Senior et al., 2018). Conversely, CP has a simpler canopy structure, predominantly featuring a single layer of cashew trees of similar age. The understory in these areas is sparser, and the reduction in deadwood, due to management, facilitates greater global radiation penetration and elevates soil temperatures.

Our observed annual mean soil water content across the three land-cover classes ( $0.14\text{--}0.23\text{ m}^3\text{ m}^{-3}$ ) is consistent with earlier findings (Rodell et al., 2004; Wang et al., 2012; Horel et al., 2022). Variations in *SWC* among these classes may stem from differences in their stand structural complexity (vegetation cover and root system) and soil properties (organic matter content and texture) (Pickering et al., 2021; Tang et al., 2021). The higher *SWC* in evergreen forests compared to regrowth forests is attributed to their dense and multilayered vegetation cover, which reduces global radiation and temperature at the forest floor, thereby reducing evaporation and maintaining topsoil moisture (Fig. 6). In addition, the complex root systems of primary forests enhance water retention by creating channels and pores in the soil, while organic matter from deadwood and litterfall further enhances soil water retention, particularly during arid conditions (Luo et al., 2023). Another explanation could be the soil texture, as our field investigation observed that cashew plantations are all on sandier soils with lower water-holding capacity, leading to decreased *SWC* (Ibrahim and Alghamdi, 2021). Nevertheless, further examination of soil samples is necessary to accurately measure the specific soil properties in each land-cover class.

The analysis of soil electrical conductivity categorized the soils as non-saline across the land-cover classes. evergreen forests had higher *ECs* than cashew and regrowth forests, potentially indicating larger nutrient availability (Omuto et al., 2020). This higher nutrient availability in evergreen forests may be linked to greater organic matter decomposition, species richness, higher soil moisture content, and no history of being clear-cut, which could lead to nutrient losses via run-off during the phase without vegetation (Austin et al., 2004; Vestin et al., 2020; Guo et al., 2023b).

#### 4.3 Species diversity

The mean species richness and biodiversity (the Shannon-Wiener index) of evergreen forests and regrowth forests (Table 2) were similar to several previous studies of evergreen forests (Zin and Mitlöhner, 2020; Theilade et al., 2022; Tynsong et al., 2022). However, species richness was lower compared to the most diverse rainforests in South America and Southeast Asia, where often  $> 250$  species  $\text{ha}^{-1}$  have been reported (Mohd Nazip, 2012; ter Steege et al., 2023) and the Shannon-Wiener index was lower than for some moist evergreen and humid lowland forests in Southeast Asia (Mohd Nazip, 2012; Zin and Mitlöhner, 2020). These tropical rainforests may have more species because of their larger forest patch sizes and higher rainfall, compared to the relatively isolated monsoon forest at the top of Kulen, surrounded by agricultural areas (Galanes and Thomlinson, 2009). The relatively low  $S_H$  may also be explained by the high proportion of the top five dominant species in each land cover, accounting for over 50 % of total stems in their communities. Another possible reason could be the limited number of sample plots, which may not fully capture the overall species composition and distribution in these forests. Tropical tree species



composition is markedly influenced by biogeography and disturbance history, showing significant local variations even over short distances (Whitmore, 1998; Van and Cochard, 2017). This emphasizes the necessity for comprehensive field data sampling to accurately assess the species richness and evenness of these highly diverse plant communities. The comparison between  $S_R$  and  $S_H$  of EF and RF with previous studies is presented in Table S10.1– S10.2.

#### 430 **4.4 Leaf functional traits and diversity**

Specific leaf area, leaf dry matter content, and chlorophyll content are all key leaf traits in the leaf economic spectrum, and carry diverse implications for understanding carbon sequestration, resource availability, successional stages, and environmental responses (Wright et al., 2004; Gao et al., 2022). The  $SLA_{cwm}$  of EF exceeded the mean values of tropical forests in Bolivia, Brazil, Costa Rica, and China (Finegan et al., 2015; Wang et al., 2016). The  $SLA_{cwm}$  of RF was somewhat higher  
435 than the mean of neotropical regrowth forests, but still within the range (Poorter, 2021).  $SLA_{cwm}$  in CP was greater than the range value in Parakou, Benin, but fell within the range reported for 15 cashew varieties in Karnataka, India (Akossou et al., 2016; Mog and Nayak, 2018). Furthermore, our observations emphasize the significant consequences of transitioning from EF to RF or CP, resulting in a substantial reduction in actual values and diversity in  $SLA_{cwm}$ , reflecting a reduction in both ecosystem productivity and resilience to disturbances (Liu et al., 2023). The higher  $SLA_{cwm}$  in EF, suggests higher  
440 photosynthetic capacity, especially in shaded environments, due to its dense canopy cover and abundant resource availability (water and nutrients) for plant growth (Green et al., 2020). High  $SLA_{cwm}$  values also link to faster turnover and promote nutrient cycles, carbon sequestration, and nutrient use efficiency in forest ecosystems (Guerrieri et al., 2021). The lower  $SLA_{cwm}$  values of RF and CP may be attributed to limited water and nutrient availability in the soil because of high competition in those ecosystems. The notable reduction in  $SLA_{cwm}$  caused by the shift from EF to RF or CP underlines the profound impact land-  
445 cover change has on both  $SLA_{cwm}$  and, consequently, ecosystem productivity, resilience, and functioning, highlighting the impact of land-cover change on ecosystem function.

Leaf dry matter content is a measure of construction cost per fresh weight mass unit, and it serves as a metric for a plant's resource use strategy and resilience to environmental stresses (Guo et al., 2023a). The higher  $LDMC_{cwm}$  in EF compared to that of RF indicates a conservative resource usage, longer leaf lifespan, and increased carbon sequestration, implying higher  
450 ecosystem stability and function for EF (Rawat et al., 2021). Conversely, the highest  $LDMC_{cwm}$  in CP, is attributed to cashew monoculture and the species' high resilience to environmental stress, especially in nutrient-poor soils and water-stressed conditions (Bezerra et al., 2007). This study emphasises EF's increased stress tolerance, conservative resource utilisation and greater carbon sequestration compared to RF, while also emphasizing cashew as a highly proficient species in environmental stress tolerance.

455 Chlorophyll is essential for photosynthesis and serves as a crucial indicator of a plant's photosynthetic capacity, profoundly influencing overall growth (Stirbet et al., 2020). In this study,  $Chl_{cwm}$  in EF and RF falls within the range observed in Chinese forest ecosystems but surpasses the mean  $Chl_{cwm}$  in those ecosystems (Li et al., 2018). Our CP had lower  $Chl_{cwm}$  than EF and RF due to less light competition and higher temperatures, which could lead to photoinhibition and lowered leaf chlorophyll



content. The elevated  $Chl_{cwm}$  seen in EF can be attributed to the well-developed and dense canopy structure, which creates a  
460 light-shaded environment. This prompts plants to invest more in chlorophyll production, enhancing light harvesting efficiency.  
Meanwhile, RF, experiencing intense competition for light in early successional stages, may exhibit lower chlorophyll levels  
as resources prioritize vertical growth over chlorophyll production (Laurans et al., 2014).

#### 4.5 Stand structure attributes

##### 4.5.1 Tree height and diameter at breast height

465 Our mean  $DBH$  of evergreen forests is comparable to mature tropical forests in Vietnam and falls within the pantropical range,  
while regrowth forests have a slightly higher mean  $DBH$  than tropical secondary forests in Sarawak, Malaysia (Brown, 1997;  
Kenzo et al., 2009; Yen and Cochard, 2017). In contrast, cashew plantations show a significantly lower mean  $DBH$  compared  
to older counterparts in Kampong Cham, Cambodia (Avtar et al., 2013). Moreover, observed species in our evergreen forests,  
such as *Dipterocarpus costatus*, *Sandoricum indicum*, *Mesua ferrea*, *Nageia wallichiana*, and *Litchi chinensis* reach heights  
470 of 40–52 m, similar to those found in Cambodia's central evergreen forests (Theilade et al., 2022). The loss of large-diameter  
and tall trees in regrowth forests and cashew plantations, resulting from land use changes, substantially threatens critical  
ecosystem functions, jeopardizing carbon storage, nutrient cycles, and biodiversity within these transformed landscapes (Díaz  
et al., 2007; Lutz et al., 2018; Thiel et al., 2021).

##### 4.5.2 Stem density and basal area

475 Our mean stem density per hectare of evergreen forests is consistent with previous studies in Cambodia, Vietnam, and in  
Borneo, while regrowth forests show lower densities compared to those in the Yucatan Peninsula, Mexico (Slik et al., 2010;  
Con et al., 2013; Román-Dañobeytia et al., 2014; Chheng et al., 2016; Theilade et al., 2022). Additionally, our stem density in  
cashew plantations is similar to that of Isuochi, Nigeria, but significantly greater than that of Casamance, Senegal, due to their  
differences in planting distance and management practices (Nzezbule et al., 2013; Ndiaye et al., 2020). The variation in stem  
480 density between regrowth forests and evergreen forests reflects distinctive stages of succession. In the early succession stage  
following clearance, open niches and resource abundance create a favourable environment for fast-growing and highly  
reproductive early-succession species, resulting in higher stem density and heightened interspecies competition (Zhang et al.,  
2020). As the forest matures, stem density naturally decreases as larger trees occupy more space, light, water, and nutrient  
resources. This competition ultimately leads to the mortality of smaller trees, aligning with the power-law relationship between  
485 stem density and biomass commonly observed in mature forests (Mrad et al., 2020). This natural process also alters species  
composition, stand structure, habitat heterogeneity, and biomass of forests (Forrester et al., 2021). In cashew plantations, stem  
density is controlled by humans to enhance cashew yield. This alteration in stand structure complexity influences interspecies  
competition. These modifications also affect stand structure and interspecies competition, ultimately influencing the  
biodiversity and functioning of the ecosystem.



490 Basal area, by incorporating both cross-sectional area and stem density in a given area, offers crucial insights into stand  
structure dynamics. The basal area of evergreen forests in our study aligns with those in northeast Cambodia and Pahang  
National Park, Malaysia, but falls below values reported for Laos, Cambodia's central plains and Vietnam's lowlands (Rundel,  
1999; Sovu et al., 2009; Mohd Nazip, 2012; Chheng et al., 2016; Theilade et al., 2022). Regrowth forests have lower *BA* than  
evergreen forests, indicating early succession and disturbance (Ziegler, 2000). Still, our regrowth forest's *BA* exceeds that of  
495 regrowth forest in Laos, while cashew plantations surpass plantations in Tanzania's (Sovu et al., 2009; Malimbwi et al., 2016).  
Basal area decreases significantly when EF is replaced with CP or RF, impacting biomass, productivity, stand structure, and  
structural complexity (Gea-Izquierdo and Sánchez-González, 2022). While tropical forests possess natural regenerative  
capabilities, RF may require several decades to achieve *BA* levels comparable to EF, highlighting the critical importance of  
conserving EF to maintain their ecological integrity and ecosystem services.

#### 500 4.5.3 *DBH-H* relationships and estimations of aboveground biomass

The *DBH-H* relationship is crucial for understanding variations in tree growth rates, successional stage, aboveground biomass,  
and forest health (Kramer et al., 2023). Finding a strong positive *DBH-H* relationship may indicate disturbances within the  
ecosystem, as these by initiating gaps in the canopy provide opportunities for fast-growing species to establish and utilize  
increased light availability and resources within the ecosystem (Senf et al., 2020). Hence, the observed relationships between  
505 EF and RF suggest a composition of fast-growing species and indicate that EF may have experienced past disturbances. Indeed,  
a windthrow in EF1 is reflected in its lowest *LAI<sub>c</sub>* among EF plots and a smaller mean *DBH* (Fig. S7.1a).

The lower *DBH-H* relationship in cashew plantations results from the growth strategy of the single species and management  
practices. In monocultures with uniformly aged cashew plants, competition for light and resources is comparable, resulting in  
a consistent resource distribution. Cashew's natural growth characteristics, with the species reaching up to 15 m in height and  
510 a *DBH* of 100 cm under favourable conditions (Avtar et al., 2014), indicate a preference for investing resources in branches  
and stems over height, especially in low-light competition environments. However, our observations indicate significant  
variation in the *DBH-H* relationship among CP plots (low  $R^2$  value in Fig. 3, Fig. S7.5g–i) which may have been influenced  
by their different management practices, such as spacing, pruning, and thinning. These practices impact the *DBH-H*  
relationship by minimizing light competition, resulting in a higher *DBH-H* ratio which also affects the relationship (Deng et  
515 al., 2019; Bhandari et al., 2021).

Recent studies have emphasized the significant uncertainty in estimating plot-level aboveground biomass when directly  
applying a generic *AGB* allometric equation ( $AGB_f$ ) due to variations in species composition and stand structure between the  
study site and the equation's origin (Feldpausch et al., 2011; Burt et al., 2020). To address this challenge, our study proposes  
an allometric approach ( $AGB_h$ ) using local species-specific wood density and the *DBH-H* relationship at the study site. This  
520 approach captures the unique characteristics of the site's species composition and stand structure (Ketterings et al., 2001;  
Nyirambangutse et al., 2017). Our locally adopted  $AGB_h$  method produced estimates ~ 30 % higher than the generic  $AGB_f$  for  
both EF and RF (Table 2, Fig. 4b). This is likely due to the combined effects of higher mean wood density and a stronger *DBH*





relationship, resulting in a more pronounced exponential growth response in  $AGB$  (Fig. 4a). Still, these ~ 30 % higher values align with the range reported in previous studies (Tables A2–A3). In contrast, in the CP case, our  $AGB_h$  method produced estimates less than a quarter of the generic  $AGB_f$  method. The reason is that the  $AGB_h$  method is less reliable when a weak  $DBH-H$  relationship is detected because it fails to accurately capture the overall tree size and volume. This is also reflected in the substantially larger uncertainty in the CP  $AGB_h$  method as indicated by the standardized errors of the parameters within the  $DBH-H$  relationship (Table A4; Table S7.1). However, to fully validate the  $AGB$  allometric equations destructive field-observed data would be necessary. Therefore, future research should include direct field measurements of  $AGB$  to more accurately validate the methods for these land-cover classes.

#### 4.5.4 Deadwood biomass

Deadwood biomass indicates biodiversity and ecosystem health, supporting various species and ecosystem processes like carbon and nitrogen cycling, soil fertility enhancement, pollination, and erosion control (Parisi et al., 2018a; Santopuoli et al., 2021; Tláskal et al., 2021). In evergreen and regrowth forests, we found total deadwood biomass comparable to Cambodia and Malaysia (Saner et al., 2012; Kiyono et al., 2018). However, our cashew plantations have less  $DWB$  than plantations in Cameroon (Victor et al., 2021). Variations in total  $DWB$  values could result from the degree of disturbances within the studied forests (Baker et al., 2007). The higher  $DWB$  in EF is due to its old stand age, long-term accumulation of  $DWB$ , and absence of slash-and-burn practice as observed in RF and CP (van Galen et al., 2019). In CP, some farmers periodically cut and burn dead branches of cashew trees to promote growth.

#### 4.6 LAI and fPAR

In our study, canopy leaf area index in evergreen forests surpasses that of dry evergreen forests in Kampong Thom, Cambodia, while regrowth forests lie between those of 18–35-year tropical secondary forests in Costa Rica; however, cashew plantations exceed reported values in India (Ito et al., 2007; Clark et al., 2021; Kumaresh et al., 2023). The  $LAI_C$  difference between the forests (EF and RF) and CP was significant due to CP management practices, resulting in a thin canopy with low  $LAI_C$ . In contrast, natural forests with their densely developed canopy have a high  $LAI_C$ . Additionally,  $LAI_C$  phenology followed the rainy and dry seasons, with peak values during the rainy season and low values during the dry season (Ito et al., 2007). During the dry season, reduced rainfall leads to less water availability for plant growth, causing plants to adapt to water stress by shedding their leaves, resulting in low  $LAI_C$  in the ecosystem (Maréchaux et al., 2018). The comparison between  $LAI_C$  and  $LAI_T$  of EF and RF with previous studies is presented in Table S10.3.

Our mean fraction of photosynthetically active radiation for EF and RF marginally exceeded the global range for broadleaf forests and the monthly range observed in the Amazon tropical forest in Santarém, Brazil (Senna et al., 2005; Pastorello et al., 2020). The  $fPAR$  for CP, on the other hand, is within the range values reported for broadleaf crops (Xiao et al., 2015). Despite annual variations in  $LAI_C$  (24 % for EF, 32 % for RF, 29 % for CP) and incoming solar irradiance,  $fPAR$  remained remarkably stable throughout the year in the forest ecosystems (EF and RF, Fig. 7). This stability can be attributed to the exponential



555 relationship between  $fPAR$  and  $LAI$ , which typically saturates at  $LAI$  above 3 (Dawson et al., 2003). Our recorded lowest  $LAI$  for EF and RF was 3.48, likely contributing to this saturation and explaining the lack of phenology displayed in  $fPAR$ . The exclusion of reflected  $PAR$  above the canopy in the  $fPAR$  estimation may also contribute to the stability; however, previous studies have shown that the difference between intercepted (what we measured) and absorbed  $PAR$  (including the reflected component) is minimal (Olofsson and Eklundh, 2007).

#### 560 4.7 $AGB_h$ relationships with $LAI_T$ , $SLA_{cwm}$ and $S_R$

Exploring the relationship between aboveground biomass and key ecosystem characteristics such as leaf area index, specific leaf area, and species richness is vital for comprehending the complexity of ecosystem dynamics and informing ecosystem modelling. We observed a strong positive relationship between  $LAI_T$  and  $AGB_h$ , supporting prior findings (He et al., 2021; Zhao et al., 2021). Higher  $LAI_T$  enhances light interception and results in higher biomass. Elevated  $AGB_h$  levels stimulate  $LAI_T$  expansion by providing resources for robust leaf growth, leading to a denser canopy and greater leaf coverage. Similarly, our findings support a positive relationship between  $SLA_{cwm}$  and  $AGB_h$  (Finegan et al., 2015; Ali et al., 2017; Gao et al., 2021). Higher  $SLA_{cwm}$  values indicate a plant community with improved photosynthetic capacity, nutrient uptake, and leaf turnover, which is essential for nutrient cycling (Reich et al., 1991). An increase in  $AGB_h$  has a reinforced effect on  $SLA_{cwm}$  values, suggesting enrichment of the soil nutrient pool and providing structural support for plant growth. This influences light availability and competition dynamics, affecting leaf morphology and  $SLA_{cwm}$ . Furthermore, the positive relationship between  $AGB_h$  and  $S_R$  is widely observed and explained by the niche complementarity hypothesis (Waide et al., 1999; Jactel et al., 2018; Steur et al., 2022). This concept suggests that an ecosystem with high species diversity has a greater variation in functional traits and resource-use strategies, lowering competition for scarce resources, and thus promoting productivity (Tilman et al., 1997). In return, an increase in  $AGB_h$  fosters the coexistence of diverse species by providing more available resources and habitat complexity in an ecosystem, thereby increasing species richness.

### 5 Conclusions Looks like a summary rather than conclusions, and it's too long. Here it's better to provide your key findings, futher instructions or more practical suggestions for the future

Land use and land cover change is one of the most severe environmental challenges within the Earth system. In the context of tackling current global environmental challenges, field observations are necessary to assess the dynamic responses of ecosystems to changing environmental conditions on fine spatial and temporal scales. Especially Southeast Asia, renowned for its biodiversity richness, suffers from a scarcity of integrated datasets that encompass a broad spectrum of ecosystem characteristics across different land-cover classes. Here we present the first data of a newly established field site in a tropical forest region of Southeast Asia (the Kulen National Park, Cambodia), where we started monitoring ecosystem characteristics of land-cover classes with various anthropogenic pressures (pristine evergreen forests, regrowth forests, and cashew plantations). We thereafter used the observed ecosystem characteristics for the land-cover classes with various anthropogenic pressures, to provide a comprehensive analysis of changes in ecosystem characteristics between these classes. Our results

Shorten them into one sentence showing the background of this work



highlight a substantial reduction in soil water content, species diversity, leaf functions, stand structural complexity, aboveground biomass, deadwood, leaf area index, and fraction of photosynthetically active radiation absorbed by the tree canopy, in the land-cover classes affected by the anthropogenic land cover conversion. We further demonstrate the utility of our novel dataset for improving aboveground biomass estimation through the application of an allometric function based on locally specific wood density and the *DBH-H* relationship. This approach has great potential for improving carbon stock estimations and promoting informed forest management practices. Moreover, our analysis of relationships between leaf area index, specific leaf area, species richness and aboveground biomass, underlines profound impact land-cover change has on ecosystem productivity and functioning in these tropical forest regions. We further expect that the dissemination of our datasets will contribute valuable insights for advancing the understanding of tropical forest ecosystems in Southeast Asia, support research, and promote sustainable forest management under global environmental challenges.

## Appendix A

**Table A1. Estimated lying deadwood biomass ( $\text{Mg ha}^{-1}$ ), standing deadwood biomass ( $\text{Mg ha}^{-1}$ ), and total deadwood biomass ( $\text{Mg ha}^{-1}$ ) by different land-cover classes in Kulen. Mean  $\pm$  SD is a mean plus or minus a standard deviation.**

| Land cover | Lying deadwood biomass ( $\text{Mg ha}^{-1}$ ) |            | Standing deadwood biomass ( $\text{Mg ha}^{-1}$ ) |         | Total deadwood biomass ( $\text{Mg ha}^{-1}$ ) |             |
|------------|------------------------------------------------|------------|---------------------------------------------------|---------|------------------------------------------------|-------------|
|            | Mean $\pm$ SD                                  | Range      | Mean $\pm$ SD                                     | Range   | Mean $\pm$ SD                                  | Range       |
| EF (n = 3) | 17.74 $\pm$ 19.93                              | 1.64–40.03 | 9.74 $\pm$ 8.49                                   | 0–15.56 | 27.48 $\pm$ 12.37                              | 15.31–40.03 |
| RF (n = 3) | 3.65 $\pm$ 5.32                                | 0.48–9.79  | 1.16 $\pm$ 1.66                                   | 0–3.06  | 4.81 $\pm$ 6.97                                | 0.48–12.85  |
| CP (n = 3) | 0.40 $\pm$ 0.19                                | 0.28–0.62  | 0                                                 | 0       | 0.40 $\pm$ 0.19                                | 0.28–0.62   |

**Table A2. Comparing estimated aboveground biomass (*AGB*,  $\text{Mg ha}^{-1}$ ) in evergreen forests (EF) using adopted allometric equations (*AGB<sub>f</sub>*), diameter at breast height (*DBH*) and tree height (*H*) power-law relationship (*AGB<sub>h</sub>*), and previous *AGB* reported in previous studies. Mean  $\pm$  SD is a mean plus or minus a standard deviation.**

| No. | Region                               | Vegetation type                   | <i>AGB</i> ( $\text{Mg ha}^{-1}$ ) |               | References                           |
|-----|--------------------------------------|-----------------------------------|------------------------------------|---------------|--------------------------------------|
|     |                                      |                                   | Mean $\pm$ SD                      | Range         |                                      |
| 1   | Kulen, Cambodia                      | Tropical evergreen forest         | 311.66 $\pm$ 183.88                | 147.53–510.57 | <i>AGB<sub>h</sub></i> in this study |
| 2   | Kulen, Cambodia                      | Tropical evergreen forest         | 238.53 $\pm$ 92.41                 | 161.83–341.13 | <i>AGB<sub>f</sub></i> in this study |
| 3   | Global                               | Tropical forest                   | 379.02 $\pm$ 187.40                | 230.58–589.58 | Chave et al. (2014)                  |
| 4   | Gia Lai, Vietnam                     | Tropical evergreen forest         | 273.24 $\pm$ 112.22                | 189.53–400.76 | Nam et al. (2016)                    |
| 5   | Mondulkiri, Cambodia                 | Tropical moist evergreen forest   | 333.00 $\pm$ 137.00                | 78.00–837.00  | Sola et al., (2014)                  |
| 6   | Borneo (Brunei, Malaysia, Indonesia) | Tropical lowland evergreen forest | 458.16 $\pm$ 123.62                | 196.30–778.50 | Slik et al. (2010))                  |



|    |                        |                                                            |                 |               |                          |
|----|------------------------|------------------------------------------------------------|-----------------|---------------|--------------------------|
| 7  | Thanh Hoa, Vietnam     | Tropical evergreen broadleaf forest                        | 251.81 ± 125.43 | 40.88–543.88  | Nguyen and Kappas (2020) |
| 8  | Africa                 | Tropical evergreen forest                                  | 429.00          | 114.00–749.00 | Lewis et al. (2013)      |
| 9  | Cambodia               | Evergreen forest                                           | 243.00 ± 128.00 | 11.00–837.00  | Sola et al., (2014)      |
| 10 | Kampong Thom, Cambodia | Evergreen forest                                           | 294.00 ± 65.00  | 176.00–398.00 | Ota et al. (2015)        |
| 11 | Vietnam                | Tropical evergreen broadleaf forests in various ecoregions | 230.10 ± 8.60   | 199.00–320.20 | Van Do et al. (2020)     |

605 **Table A3. Comparing estimated aboveground biomass ( $AGB$ ,  $Mg\ ha^{-1}$ ) in regrowth forests (RF) using adopted allometric equations ( $AGB_r$ ), diameter at breast height ( $DBH$ ) and tree height ( $H$ ) power-law relationship ( $AGB_h$ ), and previous  $AGB$  reported in previous studies. Mean ± SD is a mean plus or minus a standard deviation.**

| No. | Region                 | Vegetation type                   | $AGB$ ( $Mg\ ha^{-1}$ ) |              | References               |
|-----|------------------------|-----------------------------------|-------------------------|--------------|--------------------------|
|     |                        |                                   | Mean ± SD               | Range        |                          |
| 1   | Kulen, Cambodia        | Natural regrowth evergreen forest | 54.19 ± 14.09           | 38.26–65.04  | $AGB_h$ in this study    |
| 2   | Kulen, Cambodia        | Natural regrowth evergreen forest | 41.66 ± 9.82            | 31.60–51.21  | $AGB_r$ in this study    |
| 3   | Sumatra, Indonesia     | Mixed secondary forest            | 59.04 ± 17.15           | 39.26–69.79  | Ketterings et al. (2001) |
| 4   | Kampong Thom, Cambodia | Regrowth forest                   | 42.00 ± 21.00           | 22.00–90.00  | Ota et al. (2015)        |
| 5   | Malaysia               | Young forests aged 8.5–17 years   | 63.60 ± 34.93           | 34.00–118.00 | Kho and Jepsen (2015)    |

610 **Table A4. Comparing estimated aboveground biomass ( $AGB$ ,  $Mg\ ha^{-1}$ ) in cashew plantations (CP) using adopted allometric equations ( $AGB_r$ ), diameter at breast height ( $DBH$ ) and tree height ( $H$ ) power-law relationship ( $AGB_h$ ), and previous  $AGB$  reported in previous studies. Mean ± SD is a mean plus or minus a standard deviation.**

| No. | Region                 | Vegetation type                                                            | $AGB$ ( $Mg\ ha^{-1}$ ) |              | References                   |
|-----|------------------------|----------------------------------------------------------------------------|-------------------------|--------------|------------------------------|
|     |                        |                                                                            | Mean ± SD               | Range        |                              |
| 1   | Kulen, Cambodia        | Family-scale cashew plantation                                             | 16.70 ± 4.80            | 11.23–20.23  | $AGB_h$ in this study        |
| 2   | Kulen, Cambodia        | Family-scale cashew plantation                                             | 70.60 ± 22.01           | 46.16–88.87  | $AGB_r$ in this study        |
| 3   | Benin                  | Cashew agroforestry farming                                                | 18.07 ± 2.14            | -            | Biah et al. (2019)           |
| 4   | Guinean, Cote d'Ivoire | Cashew plantation                                                          | 13.78 ± 0.98            | -            | Kanmegne Tamga et al. (2022) |
| 5   | Kampong Cham, Cambodia | Large-scale and intensively managed cashew plantation (10–16 years of age) | 104.30 ± 19.65          | 72.00–143.00 | Avtar et al. (2013)          |



## Data availability

All the collected data used in this study are publicly available via the links as follows:

1. The datasets of the forest inventory, leaf area index, and leaf functional traits across various land-cover classes are available at <https://doi.org/10.5281/zenodo.10146582> (Sovann et al., 2024a).
- 615 2. The daily data, including *fPAR*, soil conditions, and meteorological conditions from April 10, 2022, to April 9, 2023, can be downloaded from <https://doi.org/10.5281/zenodo.10159726> (Sovann et al., 2024b).
3. Future data from the field site will be uploaded to [https://zenodo.org/communities/cambodia\\_ecosystem\\_data](https://zenodo.org/communities/cambodia_ecosystem_data) on a regular basis.

## Author contribution

620 CS led field data collection, analysis, and manuscript writing. TT and SO contributed to conceptualization, manuscript review, editing, and supervision. SK and SS provided administrative support and supervised fieldwork in Cambodia. PV offered technical guidance and support in equipment installation and maintenance. SB managed field data collection. All authors contributed to editing the manuscript.

## Competing interests

625 The authors declare no conflict of interest.

## Acknowledgements

This work was supported by the Swedish International Development Cooperation Agency through the "Sweden-Royal University of Phnom Penh Bilateral program" (Contribution Number: 11599). Tagesson was additionally funded by the Swedish National Space Agency (SNSA Dnr: 2021-00144) and Formas (Dnr. 2021-00644; 2023-02436). The research  
630 presented in this paper is a contribution to the Strategic Research Area "Biodiversity and Ecosystem Services in a Changing Climate", BECC, funded by the Swedish government.

We are grateful to the Ministry of Environment (Cambodia) and Siem Reap Provincial Administration for their grant permissions, administrative support, and accommodation during our fieldwork. A special note of thanks goes to Seng Saingheat for his dedication and leadership, along with his ranger colleagues, including Sou Sy, Let Chey, Khun Chi, Soun Sao, Kroem  
635 Veng, Choun Choy, and Ti Has. Sincere appreciation to the research teams from the Royal University of Agriculture (Cambodia), namely Horn Sarun, Yorn Chomroeun, Sok Pheak, Sum Dara, and Long Sotheara, for their invaluable support



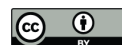

in forest inventory. We greatly appreciate Mot Ly and Chim Lychheng, as well as Rum Pheara, Svay Chanboth, and Mach Sokmean, for their support throughout our data collection journey.

## References

- 640 Akossou, A. Y. J., Salifou, A. D., Tchiwanou, L. A., Assani Saliou, S. A., and Azoua, M. H.: Area and Dry Mass Estimation of Cashew (*Anacardium Occidentale*) Leaves: Effect of Tree Position within a Plantation around Parakou, Benin, *Journal of Experimental Agriculture International*, 15, 1-12, <https://doi.org/10.9734/JEAI/2017/29798>, 2016.
- Akram, M. A., Wang, X., Shrestha, N., Zhang, Y., Sun, Y., Yao, S., Li, J., Hou, Q., Hu, W., Ran, J., and Deng, J.: Variations and Driving Factors of Leaf Functional Traits in the Dominant Desert Plant Species Along an Environmental Gradient in the Drylands of China, *Science of The Total Environment*, 897, 165394, <https://doi.org/10.1016/j.scitotenv.2023.165394>, 2023.
- 645 Ali, A., Yan, E.-R., Chang, S. X., Cheng, J.-Y., and Liu, X.-Y.: Community-Weighted Mean of Leaf Traits and Divergence of Wood Traits Predict Aboveground Biomass in Secondary Subtropical Forests, *Science of The Total Environment*, 574, 654-662, <https://doi.org/10.1016/j.scitotenv.2016.09.022>, 2017.
- 650 Artaxo, P., Hansson, H. C., Machado, L. A. T., and Rizzo, L. V.: Tropical Forests Are Crucial in Regulating the Climate on Earth, *PLOS Climate*, 1, e0000054, <https://doi.org/10.1371/journal.pclm.0000054>, 2022.
- Austin, A. T., Yahdjian, L., Stark, J. M., Belnap, J., Porporato, A., Norton, U., Ravetta, D. A., and Schaeffer, S. M.: Water Pulses and Biogeochemical Cycles in Arid and Semiarid Ecosystems, *Oecologia*, 141, 221-235, <https://doi.org/10.1007/s00442-004-1519-1>, 2004.
- 655 Avtar, R., Suzuki, R., and Sawada, H.: Natural Forest Biomass Estimation Based on Plantation Information Using Palsar Data, *PLoS ONE*, 9, e86121, <https://doi.org/10.1371/journal.pone.0086121>, 2014.
- Avtar, R., Takeuchi, W., and Sawada, H.: Monitoring of Biophysical Parameters of Cashew Plants in Cambodia Using Alos/Palsar Data, *Environmental Monitoring and Assessment*, 185, 2023-2037, <https://doi.org/10.1007/s10661-012-2685-y>, 2013.
- 660 Baker, T. R., Honorio Coronado, E. N., Phillips, O. L., Martin, J., van der Heijden, G. M. F., Garcia, M., and Silva Espejo, J.: Low Stocks of Coarse Woody Debris in a Southwest Amazonian Forest, *Oecologia*, 152, 495-504, <https://doi.org/10.1007/s00442-007-0667-5>, 2007.
- Barlow, J., Lennox, G. D., Ferreira, J., Berenguer, E., Lees, A. C., Nally, R. M., Thomson, J. R., Ferraz, S. F. D. B., Louzada, J., Oliveira, V. H. F., Parry, L., Ribeiro De Castro Solar, R., Vieira, I. C. G., Aragão, L. E. O. C., Begotti, R. A., Braga, R. F., Cardoso, T. M., De Oliveira, R. C., Souza Jr, C. M., Moura, N. G., Nunes, S. S., Siqueira, J. V., Pardini, R., Silveira, J. M., Vaz-De-Mello, F. Z., Veiga, R. C. S., Venturieri, A., and Gardner, T. A.: Anthropogenic Disturbance in Tropical Forests Can Double Biodiversity Loss from Deforestation, *Nature*, 535, 144-147, <https://doi.org/10.1038/nature18326>, 2016.
- 665 Bezerra, M. A., Lacerda, C. F. D., Gomes Filho, E., Abreu, C. E. B. D., and Prisco, J. T.: Physiology of Cashew Plants Grown under Adverse Conditions, *Brazilian Journal of Plant Physiology*, 19, 449-461, <https://doi.org/10.1590/s1677-04202007000400012>, 2007.
- 670 Bhandari, S. K., Veneklaas, E. J., McCaw, L., Mazanec, R., Whitford, K., and Renton, M.: Effect of Thinning and Fertilizer on Growth and Allometry of *Eucalyptus Marginata*, *Forest Ecology and Management*, 479, 118594, <https://doi.org/10.1016/j.foreco.2020.118594>, 2021.
- 675 Biah, I., Guendehou, S., Goussanou, C., Kaire, M., and Sinsin, B.: Allometric Models for Estimating Biomass Stocks in Cashew (*Linnaeus*) Plantation in Benin, 2019.
- Brown, S.: *Estimating Biomass and Biomass Change of Tropical Forests: A Primer*, Food and Agriculture Organization of the United Nations 1997.
- 680 Burt, A., Calders, K., Cuni-Sanchez, A., Gómez-Dans, J., Lewis, P., Lewis, S. L., Malhi, Y., Phillips, O. L., and Disney, M.: Assessment of Bias in Pan-Tropical Biomass Predictions, 3, <https://doi.org/10.3389/ffgc.2020.00012>, 2020.



- Cardinale, B. J., Duffy, J. E., Gonzalez, A., Hooper, D. U., Perrings, C., Venail, P., Narwani, A., Mace, G. M., Tilman, D.,  
Wardle, D. A., Kinzig, A. P., Daily, G. C., Loreau, M., Grace, J. B., Larigauderie, A., Srivastava, D. S., and Naem,  
S.: Biodiversity Loss and Its Impact on Humanity, *Nature*, 486, 59-67, <https://doi.org/10.1038/nature11148>, 2012.
- 685 Chave, J., Andalo, C., Brown, S., Cairns, M. A., Chambers, J. Q., Eamus, D., Fölster, H., Fromard, F., Higuchi, N., Kira, T.,  
Lescure, J. P., Nelson, B. W., Ogawa, H., Puig, H., Riéra, B., and Yamakura, T.: Tree Allometry and Improved  
Estimation of Carbon Stocks and Balance in Tropical Forests, *Oecologia*, 145, 87-99,  
<https://doi.org/10.1007/s00442-005-0100-x>, 2005.
- 690 Chave, J., Réjou-Méchain, M., Búrquez, A., Chidumayo, E., Colgan, M. S., Delitti, W. B. C., Duque, A., Eid, T., Fearnside,  
P. M., Goodman, R. C., Henry, M., Martínez-Yrizar, A., Mugasha, W. A., Muller-Landau, H. C., Mencuccini, M.,  
Nelson, B. W., Ngomanda, A., Nogueira, E. M., Ortiz-Malavassi, E., Péliissier, R., Ploton, P., Ryan, C. M.,  
Saldarriaga, J. G., and Vieilledent, G.: Improved Allometric Models to Estimate the Aboveground Biomass of  
Tropical Trees, *Global Change Biology*, 20, 3177-3190, <https://doi.org/10.1111/gcb.12629>, 2014.
- Chen, B., Li, X., Xiao, X., Zhao, B., Dong, J., Kou, W., Qin, Y., Yang, C., Wu, Z., Sun, R., Lan, G., and Xie, G.: Mapping  
Tropical Forests and Deciduous Rubber Plantations in Hainan Island, China by Integrating Palsar 25-M and Multi-  
695 Temporal Landsat Images, *International Journal of Applied Earth Observation and Geoinformation*, 50, 117-130,  
<https://doi.org/10.1016/j.jag.2016.03.011>, 2016.
- Chheng, K., Sasaki, N., Mizoue, N., Khorn, S., Kao, D., and Lowe, A.: Assessment of Carbon Stocks of Semi-Evergreen  
Forests in Cambodia, *Global Ecology and Conservation*, 5, 34-47, <https://doi.org/10.1016/j.gecco.2015.11.007>,  
2016.
- 700 Chim, K., Tunnicliffe, J., Shamseldin, A., and Ota, T.: Land Use Change Detection and Prediction in Upper Siem Reap  
River, Cambodia, *Hydrology*, 6, 64, <https://doi.org/10.3390/hydrology6030064>, 2019.
- Chim, K., Tunnicliffe, J., Shamseldin, A., and Sarun, S.: Sustainable Water Management in the Angkor Temple Complex,  
Cambodia, *Sn Applied Sciences*, 3, <https://doi.org/10.1007/s42452-020-04030-0>, 2021.
- 705 Clark, D. A., Asao, S., Fisher, R., Reed, S., Reich, P. B., Ryan, M. G., Wood, T. E., and Yang, X.: Reviews and Syntheses:  
Field Data to Benchmark the Carbon Cycle Models for Tropical Forests, *Biogeosciences*, 14, 4663-4690,  
<https://doi.org/10.5194/bg-14-4663-2017>, 2017.
- Clark, D. B., Oberbauer, S. F., Clark, D. A., Ryan, M. G., and Dubayah, R. O.: Physical Structure and Biological  
Composition of Canopies in Tropical Secondary and Old-Growth Forests, *PLoS One*, 16, e0256571,  
<https://doi.org/10.1371/journal.pone.0256571>, 2021.
- 710 Con, T. V., Thang, N. T., Ha, D. T. T., Khiem, C. C., Quy, T. H., Lam, V. T., Van Do, T., and Sato, T.: Relationship  
between Aboveground Biomass and Measures of Structure and Species Diversity in Tropical Forests of Vietnam,  
*Forest Ecology and Management*, 310, 213-218, <https://doi.org/10.1016/j.foreco.2013.08.034>, 2013.
- 715 Coste, S., Baraloto, C., Leroy, C., Marcon, É., Renaud, A., Richardson, A. D., Roggy, J.-C., Schimann, H., Uddling, J., and  
Héroult, B.: Assessing Foliar Chlorophyll Contents with the Spad-502 Chlorophyll Meter: A Calibration Test with  
Thirteen Tree Species of Tropical Rainforest in French Guiana, *Annals of Forest Science*, 67, 607-607,  
<https://doi.org/10.1051/forest/2010020>, 2010.
- Dawson, T. P., North, P. R. J., Plummer, S. E., and Curran, P. J.: Forest Ecosystem Chlorophyll Content: Implications for  
Remotely Sensed Estimates of Net Primary Productivity, *International Journal of Remote Sensing*, 24, 611-617,  
<https://doi.org/10.1080/01431160304984>, 2003.
- 720 DeFries, R., Achard, F., Brown, S., Herold, M., Murdiyarto, D., Schlamadinger, B., and de Souza, C.: Earth Observations  
for Estimating Greenhouse Gas Emissions from Deforestation in Developing Countries, *Environmental Science &  
Policy*, 10, 385-394, <https://doi.org/10.1016/j.envsci.2007.01.010>, 2007.
- Deng, C., Zhang, S., Lu, Y., Froese, R. E., Ming, A., and Li, Q.: Thinning Effects on the Tree Height–Diameter Allometry of  
Masson Pine (*Pinus Massoniana* Lamb.), *Forests*, 10, 1129, <https://doi.org/10.3390/f10121129>, 2019.
- 725 Díaz, S., Lavorel, S., De Bello, F., Quétier, F., Grigulis, K., and Robson, T. M.: Incorporating Plant Functional Diversity  
Effects in Ecosystem Service Assessments, *Proceedings of the National Academy of Sciences*, 104, 20684-20689,  
<https://doi.org/10.1073/pnas.0704716104>, 2007.
- Edwards, D. P., Larsen, T. H., Docherty, T. D. S., Ansell, F. A., Hsu, W. W., Derhé, M. A., Hamer, K. C., and Wilcove, D.  
S.: Degraded Lands Worth Protecting: The Biological Importance of Southeast Asia's Repeatedly Logged Forests,  
730 *Proceedings of the Royal Society B: Biological Sciences*, 278, 82-90, <https://doi.org/10.1098/rspb.2010.1062>, 2011.



- 735 Feldpausch, T. R., Banin, L., Phillips, O. L., Baker, T. R., Lewis, S. L., Quesada, C. A., Affum-Baffoe, K., Arets, E. J. M. M., Berry, N. J., Bird, M., Brondizio, E. S., De Camargo, P., Chave, J., Djagbletey, G., Domingues, T. F., Drescher, M., Fearnside, P. M., França, M. B., Fyllas, N. M., Lopez-Gonzalez, G., Hladik, A., Higuchi, N., Hunter, M. O., Iida, Y., Salim, K. A., Kassim, A. R., Keller, M., Kemp, J., King, D. A., Lovett, J. C., Marimon, B. S., Marimon-Junior, B. H., Lenza, E., Marshall, A. R., Metcalfe, D. J., Mitchard, E. T. A., Moran, E. F., Nelson, B. W., Nilus, R., Nogueira, E. M., Palace, M., Patiño, S., Peh, K. S. H., Raventos, M. T., Reitsma, J. M., Saiz, G., Schrodt, F., Sonké, B., Taedoumg, H. E., Tan, S., White, L., Wöll, H., and Lloyd, J.: Height-Diameter Allometry of Tropical Forest Trees, *Biogeosciences*, 8, 1081-1106, <https://doi.org/10.5194/bg-8-1081-2011>, 2011.
- 740 Feng, X., Uriarte, M., González, G., Reed, S., Thompson, J., Zimmerman, J. K., and Murphy, L.: Improving Predictions of Tropical Forest Response to Climate Change through Integration of Field Studies and Ecosystem Modeling, *Global Change Biology*, 24, e213-e232, <https://doi.org/10.1111/gcb.13863>, 2018.
- Fichtner, A. and Härdtle, W.: Forest Ecosystems: A Functional and Biodiversity Perspective, in: Perspectives for Biodiversity and Ecosystems, Springer International Publishing, 383-405, [https://doi.org/10.1007/978-3-030-57710-0\\_16](https://doi.org/10.1007/978-3-030-57710-0_16), 2021.
- 745 Finegan, B., Peña-Claros, M., de Oliveira, A., Ascarrunz, N., Bret-Harte, M. S., Carreño-Rocabado, G., Casanoves, F., Díaz, S., Eguiguren Velepucha, P., Fernandez, F., Licona, J. C., Lorenzo, L., Salgado Negret, B., Vaz, M., and Poorter, L.: Does Functional Trait Diversity Predict above-Ground Biomass and Productivity of Tropical Forests? Testing Three Alternative Hypotheses, 103, 191-201, <https://doi.org/10.1111/1365-2745.12346>, 2015.
- 750 Fischer, R., Bohn, F., Dantas de Paula, M., Dislich, C., Groeneveld, J., Gutiérrez, A. G., Kazmierczak, M., Knapp, N., Lehmann, S., Paulick, S., Pütz, S., Rödiger, E., Taubert, F., Köhler, P., and Huth, A.: Lessons Learned from Applying a Forest Gap Model to Understand Ecosystem and Carbon Dynamics of Complex Tropical Forests, *Ecological Modelling*, 326, 124-133, <https://doi.org/10.1016/j.ecolmodel.2015.11.018>, 2016.
- 755 Forrester, D. I., Baker, T. G., Elms, S. R., Hobi, M. L., Ouyang, S., Wiedemann, J. C., Xiang, W., Zell, J., and Pulkkinen, M.: Self-Thinning Tree Mortality Models That Account for Vertical Stand Structure, Species Mixing and Climate, *Forest Ecology and Management*, 487, 118936, <https://doi.org/10.1016/j.foreco.2021.118936>, 2021.
- Galanes, I. T. and Thomlinson, J. R.: Relationships between Spatial Configuration of Tropical Forest Patches and Woody Plant Diversity in Northeastern Puerto Rico, *Plant Ecol*, 201, 101-113, <https://doi.org/10.1007/s11258-008-9475-1>, 2009.
- 760 Gamon, J. A., Coburn, C., Flanagan, L. B., Huemmrich, K. F., Kiddle, C., Sanchez-Azofeifa, G. A., Thayer, D. R., Vescovo, L., Gianelle, D., Sims, D. A., Rahman, A. F., and Pastorello, G. Z.: Specnet Revisited: Bridging Flux and Remote Sensing Communities, *Canadian Journal of Remote Sensing*, 36, S376-S390, <https://doi.org/10.5589/m10-067>, 2010.
- Gao, J., Wang, K., and Zhang, X.: Patterns and Drivers of Community Specific Leaf Area in China, *Global Ecology and Conservation*, 33, e01971, <https://doi.org/10.1016/j.gecco.2021.e01971>, 2022.
- 765 Gao, W.-Q., Lei, X.-D., Gao, D.-L., and Li, Y.-T.: Mass-Ratio and Complementarity Effects Simultaneously Drive Aboveground Biomass in Temperate Quercus Forests through Stand Structure, 11, 16806-16816, <https://doi.org/10.1002/ece3.8312>, 2021.
- Gardner, T. A., Barlow, J., Chazdon, R., Ewers, R. M., Harvey, C. A., Peres, C. A., and Sodhi, N. S.: Prospects for Tropical Forest Biodiversity in a Human-Modified World, *Ecology Letters*, 12, 561-582, <https://doi.org/10.1111/j.1461-0248.2009.01294.x>, 2009.
- 770 Garnier, E., Shipley, B., Roumet, C., and Laurent, G.: A Standardized Protocol for the Determination of Specific Leaf Area and Leaf Dry Matter Content, *Functional Ecology*, 15, 688-695, <https://doi.org/10.1046/j.0269-8463.2001.00563.x>, 2001.
- 775 Garnier, E., Cortez, J., Billès, G., Navas, M.-L., Roumet, C., Debussche, M., Laurent, G., Blanchard, A., Aubry, D., Bellmann, A., Neill, C., and Toussaint, J.-P.: Plant Functional Markers Capture Ecosystem Properties During Secondary Succession, *Ecology*, 85, 2630-2637, <https://doi.org/10.1890/03-0799>, 2004.
- Gea-Izquierdo, G. and Sánchez-González, M.: Forest Disturbances and Climate Constrain Carbon Allocation Dynamics in Trees, 28, 4342-4358, <https://doi.org/10.1111/gcb.16172>, 2022.
- 780 Geissler, P., Hartmann, T., Ihlow, F., Neang, T., Seng, R., Wagner, P., and Bohme, W.: Herpetofauna of the Phnom Kulen, *Cambodian Journal of Natural History*, 40, 2019.



- Geng, J., Li, H., Pang, J., Zhang, W., and Shi, Y.: The Effects of Land-Use Conversion on Evapotranspiration and Water Balance of Subtropical Forest and Managed Tea Plantation in Taihu Lake Basin, China, 36, e14652, <https://doi.org/10.1002/hyp.14652>, 2022.
- 785 Giam, X.: Global Biodiversity Loss from Tropical Deforestation, *Proceedings of the National Academy of Sciences*, 114, 5775-5777, <https://doi.org/10.1073/pnas.1706264114>, 2017.
- Gloor, M., Brienen, R. J. W., Galbraith, D., Feldpausch, T. R., Schöngart, J., Guyot, J. L., Espinoza, J. C., Lloyd, J., and Phillips, O. L.: Intensification of the Amazon Hydrological Cycle over the Last Two Decades, *Geophysical Research Letters*, 40, 1729-1733, <https://doi.org/10.1002/grl.50377>, 2013.
- 790 Green, J. K., Berry, J., Ciais, P., Zhang, Y., and Gentine, P.: Amazon Rainforest Photosynthesis Increases in Response to Atmospheric Dryness, 6, eabb7232, <https://doi.org/10.1126/sciadv.abb7232>, 2020.
- Grogan, K., Pflugmacher, D., Hostert, P., Kennedy, R., and Fensholt, R.: Cross-Border Forest Disturbance and the Role of Natural Rubber in Mainland Southeast Asia Using Annual Landsat Time Series, *Remote Sensing of Environment*, 169, 438-453, <https://doi.org/10.1016/j.rse.2015.03.001>, 2015.
- 795 Guerrieri, R., Correia, M., Martín-Forés, I., Alfaro-Sánchez, R., Pino, J., Hampe, A., Valladares, F., and Espelta, J. M.: Land-Use Legacies Influence Tree Water-Use Efficiency and Nitrogen Availability in Recently Established European Forests, *Functional Ecology*, 35, 1325-1340, <https://doi.org/10.1111/1365-2435.13787>, 2021.
- Guo, H., Duan, D., Lei, H., Chen, Y., Li, J., Albasher, G., and Li, X.: Environmental Drivers of Landscape Fragmentation Influence Intraspecific Leaf Traits in Forest Ecosystem, *Forests*, 14, 1875, <https://doi.org/10.3390/f14091875>, 2023a.
- 800 Guo, J., Feng, H., McNie, P., Liu, Q., Xu, X., Pan, C., Yan, K., Feng, L., Adehanom Goitom, E., and Yu, Y.: Species Mixing Improves Soil Properties and Enzymatic Activities in Chinese Fir Plantations: A Meta-Analysis, *CATENA*, 220, 106723, <https://doi.org/10.1016/j.catena.2022.106723>, 2023b.
- Ha, V.: *Forest Fragmentation in Vietnam: Effects on Tree Diversity, Populations and Genetics*, Utrecht University, 2015.
- 805 He, L., Wang, R., Mostovoy, G., Liu, J., Chen, J. M., Shang, J., Liu, J., McNairn, H., and Powers, J.: Crop Biomass Mapping Based on Ecosystem Modeling at Regional Scale Using High Resolution Sentinel-2 Data, *Remote Sensing*, 13, 806, <https://doi.org/10.3390/rs13040806>, 2021.
- Hector, A.: The Effect of Diversity on Productivity: Detecting the Role of Species Complementarity, *Oikos*, 82, 597, <https://doi.org/10.2307/3546380>, 1998.
- 810 Hill, M. O.: Diversity and Evenness: A Unifying Notation and Its Consequences, *Ecology*, 54, 427-432, <https://doi.org/10.2307/1934352>, 1973.
- Horel, Á., Zsigmond, T., Molnár, S., Zagyva, I., and Bakacsi, Z.: Long-Term Soil Water Content Dynamics under Different Land Uses in a Small Agricultural Catchment, *Journal of Hydrology and Hydromechanics*, 70, 284-294, <https://doi.org/10.2478/johh-2022-0015>, 2022.
- 815 Howell, S. R., Song, G.-Z. M., Chao, K.-J., Doley, D., and Camac, J.: Functional Evaluation of Height–Diameter Relationships and Tree Development in an Australian Subtropical Rainforest, *Australian Journal of Botany*, 70, 158-173, <https://doi.org/10.1071/bt21049>, 2022.
- Huxley, J.: *Problems of Relative Growth*, L. MacVeagh, The Dial Press, New York 1932.
- Ibrahim, H. M. and Alghamdi, A. G.: Effect of the Particle Size of Clinoptilolite Zeolite on Water Content and Soil Water Storage in a Loamy Sand Soil, 13, 607, 2021.
- 820 Icrat Database: <http://db.worldagroforestry.org/>, last access: 21 May 2022.
- Ito, E., Khorn, S., Lim, S., Pol, S., Tith, B., Pith, P., Tani, A., Kanzaki, M., Kaneko, T., Okuda, Y., Kabeya, N., Nobuhiro, T., and Araki, M.: Comparison of the Leaf Area Index (Lai) of Two Types of Dipterocarp Forest on the West Bank of the Mekong River, Cambodia, *Forest Environments in the Mekong River Basin*, 214-+, [https://doi.org/10.1007/978-4-431-46503-4\\_19](https://doi.org/10.1007/978-4-431-46503-4_19), 2007.
- 825 Jacobson, C., Smith, J., Sou, S., Nielsen, C., and Hang, P.: Effective Water Management for Landscape Management in the Siem Reap Catchment, Cambodia, in: *Springer Nature Singapore*, 129-150, [https://doi.org/10.1007/978-981-16-9893-4\\_7](https://doi.org/10.1007/978-981-16-9893-4_7), 2022.
- Jactel, H., Gritti, E. S., Drossler, L., Forrester, D. I., Mason, W. L., Morin, X., Pretzsch, H., and Castagneyrol, B.: Positive Biodiversity-Productivity Relationships in Forests: Climate Matters, *Biol Lett*, 14, 20170747, <https://doi.org/10.1098/rsbl.2017.0747>, 2018.
- 830





- Johansson, E., Olin, S., and Seaquist, J.: Foreign Demand for Agricultural Commodities Drives Virtual Carbon Exports from Cambodia, *Environmental Research Letters*, 15, 064034, <https://doi.org/10.1088/1748-9326/ab8157>, 2020.
- Joseph Wright, S.: The Carbon Sink in Intact Tropical Forests, *Global Change Biology*, 19, 337-339, <https://doi.org/10.1111/gcb.12052>, 2013.
- 835 Kanmegne Tamga, D., Latifi, H., Ullmann, T., Baumhauer, R., Bayala, J., and Thiel, M.: Estimation of Aboveground Biomass in Agroforestry Systems over Three Climatic Regions in West Africa Using Sentinel-1, Sentinel-2, Alos, and Gedi Data, *Sensors*, 23, 349, <https://doi.org/10.3390/s23010349>, 2022.
- Kattge, J. and Bonisch, G. and Diaz, S. and Lavorel, S. and Prentice, I. C. and Leadley, P. and Tautenhahn, S. and Werner, G. D. A. and Aakala, T. and Abedi, M. and Acosta, A. T. R. and Adamidis, G. C. and Adamson, K. and Aiba, M. and Albert, C. H. and Alcantara, J. M. and Alcazar, C. C. and Aleixo, I. and Ali, H. and Amiaud, B. and Ammer, C. and Amoroso, M. M. and Anand, M. and Anderson, C. and Anten, N. and Antos, J. and Apgaua, D. M. G. and Ashman, T. L. and Asmara, D. H. and Asner, G. P. and Aspinwall, M. and Atkin, O. and Aubin, I. and Bastrup-Spohr, L. and Bahalkeh, K. and Bahn, M. and Baker, T. and Baker, W. J. and Bakker, J. P. and Baldocchi, D. and Baltzer, J. and Banerjee, A. and Baranger, A. and Barlow, J. and Barneche, D. R. and Baruch, Z. and Bastianelli, D. and Battles, J. and Bauerle, W. and Bauters, M. and Bazzato, E. and Beckmann, M. and Beeckman, H. and Beierkuhnlein, C. and Bekker, R. and Belfry, G. and Belluau, M. and Beloiu, M. and Benavides, R. and Benomar, L. and Berdugo-Lattke, M. L. and Berenguer, E. and Bergamin, R. and Bergmann, J. and Bergmann Carlucci, M. and Berner, L. and Bernhardt-Romermann, M. and Bigler, C. and Bjorkman, A. D. and Blackman, C. and Blanco, C. and Blonder, B. and Blumenthal, D. and Bocanegra-Gonzalez, K. T. and Boeckx, P. and Bohlman, S. and Bohning-Gaese, K. and Boisvert-Marsh, L. and Bond, W. and Bond-Lamberty, B. and Boom, A. and Boonman, C. C. F. and Bordin, K. and Boughton, E. H. and Boukili, V. and Bowman, D. and Bravo, S. and Brendel, M. R. and Broadley, M. R. and Brown, K. A. and Bruelheide, H. and Brunnich, F. and Bruun, H. H. and Bruy, D. and Buchanan, S. W. and Bucher, S. F. and Buchmann, N. and Buitenwerf, R. and Bunker, D. E. and Burger, J. and Burrascano, S. and Burslem, D. and Butterfield, B. J. and Byun, C. and Marques, M. and Scalon, M. C. and Caccianiga, M. and Cadotte, M. and Cailleret, M. and Camac, J. and Camarero, J. J. and Company, C. and Campetella, G. and Campos, J. A. and Cano-Arboleda, L. and Canullo, R. and Carbognani, M. and Carvalho, F. and Casanoves, F. and Castagneyrol, B. and Catford, J. A. and Cavender-Bares, J. and Cerabolini, B. E. L. and Cervellini, M. and Chacon-Madrigal, E. and Chapin, K. and Chapin, F. S. and Chelli, S. and Chen, S. C. and Chen, A. and Cherubini, P. and Chianucci, F. and Choat, B. and Chung, K. S. and Chytry, M. and Ciccarelli, D. and Coll, L. and Collins, C. G. and Conti, L. and Coomes, D. and Cornelissen, J. H. C. and Cornwell, W. K. and Corona, P. and Coyea, M. and Craine, J. and Craven, D. and Crowsigt, J. and Csecserits, A. and Cufar, K. and Cuntz, M. and da Silva, A. C. and Dahlin, K. M. and Dainese, M. and Dalke, I. and Dalle Fratte, M. and Dang-Le, A. T. and Danihelka, J. and Dannoura, M. and Dawson, S. and de Beer, A. J. and De Frutos, A. and De Long, J. R. and Dechant, B. and Delagrang, S. and Delpierre, N. and Derroire, G. and Dias, A. S. and Diaz-Toribio, M. H. and Dimitrakopoulos, P. G. and Dobrowolski, M. and Doktor, D. and Drevojan, P. and Dong, N. and Dransfield, J. and Dressler, S. and Duarte, L. and Ducouret, E. and Dullinger, S. and Durka, W. and Duursma, R. and Dymova, O. and A, E. V. and Eckstein, R. L. and Ejtehadi, H. and Elser, J. and Emilio, T. and Engemann, K. and Erfanian, M. B. and Erfmeier, A. and Esquivel-Muelbert, A. and Esser, G. and Estiarte, M. and Domingues, T. F. and Fagan, W. F. and Fagundez, J. and Falster, D. S. and Fan, Y. and Fang, J. and Farris, E. and Fazlioglu, F. and Feng, Y. and Fernandez-Mendez, F. and Ferrara, C. and Ferreira, J. and Fidelis, A. and Finegan, B. and Firn, J. and Flowers, T. J. and Flynn, D. F. B. and Fontana, V. and Forey, E. and Forgiarini, C. and Francois, L. and Frangipani, M. and Frank, D. and Frenette-Dussault, C. and Freschet, G. T. and Fry, E. L. and Fyllas, N. M. and Mazzochini, G. G. and Gachet, S. and Gallagher, R. and Ganade, G. and Ganga, F. and Garcia-Palacios, P. and Gargaglione, V. and Garnier, E. and Garrido, J. L. and de Gasper, A. L. and Gea-Izquierdo, G. and Gibson, D. and Gillison, A. N. and Giroldo, A. and Glasenhardt, M. C. and Gleason, S. and Gliesch, M. and Goldberg, E. and Goldel, B. and Gonzalez-Akre, E. and Gonzalez-Andujar, J. L. and Gonzalez-Melo, A. and Gonzalez-Robles, A. and Graae, B. J. and Granda, E. and Graves, S. and Green, W. A. and Gregor, T. and Gross, N. and Guerin, G. R. and Gunther, A. and Gutierrez, A. G. and Haddock, L. and Haines, A. and Hall, J. and Hambuckers, A. and Han, W. and Harrison, S. P. and Hattingh, W. and Hawes, J. E. and He, T. and He, P. and Heberling, J. M. and Helm, A. and Hempel, S. and Hentschel, J. and Herault, B. and Heres, A. M. and Herz, K. and Heuert, M. and Hickler, T. and Hietz, P. and



885 Higuchi, P. and Hipp, A. L. and Hiron, A. and Hock, M. and Hogan, J. A. and Holl, K. and Honnay, O. and  
Hornstein, D. and Hou, E. and Hough-Snee, N. and Hovstad, K. A. and Ichie, T. and Igetic, B. and Illa, E. and Isaac,  
M. and Ishihara, M. and Ivanov, L. and Ivanova, L. and Iversen, C. M. and Izquierdo, J. and Jackson, R. B. and  
Jackson, B. and Jactel, H. and Jagodzinski, A. M. and Jandt, U. and Jansen, S. and Jenkins, T. and Jentsch, A. and  
900 Jaspersen, J. R. P. and Jiang, G. F. and Johansen, J. L. and Johnson, D. and Jokela, E. J. and Joly, C. A. and Jordan,  
G. J. and Joseph, G. S. and Junaedi, D. and Junker, R. R. and Justes, E. and Kabzems, R. and Kane, J. and Kaplan,  
Z. and Kattenborn, T. and Kavelenova, L. and Kearsley, E. and Kempel, A. and Kenzo, T. and Kerkhoff, A. and  
Khalil, M. I. and Kinlock, N. L. and Kissling, W. D. and Kitajima, K. and Kitzberger, T. and Kjoller, R. and Klein,  
T. and Kleyer, M. and Klimesova, J. and Klipel, J. and Kloeppel, B. and Klotz, S. and Knops, J. M. H. and  
905 Kohyama, T. and Koike, F. and Kollmann, J. and Komac, B. and Komatsu, K. and Konig, C. and Kraft, N. J. B. and  
Kramer, K. and Kreft, H. and Kuhn, I. and Kumarathunge, D. and Kuppler, J. and Kurokawa, H. and Kurosawa, Y.  
and Kuyah, S. and Laclau, J. P. and Lafleur, B. and Lallai, E. and Lamb, E. and Lamprecht, A. and Larkin, D. J. and  
Laughlin, D. and Le Bagousse-Pinguet, Y. and le Maire, G. and le Roux, P. C. and le Roux, E. and Lee, T. and  
Lens, F. and Lewis, S. L. and Lhotsky, B. and Li, Y. and Li, X. and Lichstein, J. W. and Liebergesell, M. and Lim,  
910 J. Y. and Lin, Y. S. and Linares, J. C. and Liu, C. and Liu, D. and Liu, U. and Livingstone, S. and Llusia, J. and  
Lohbeck, M. and Lopez-Garcia, A. and Lopez-Gonzalez, G. and Lososova, Z. and Louault, F. and Lukacs, B. A.  
and Lukes, P. and Luo, Y. and Lussu, M. and Ma, S. and Maciel Rabelo Pereira, C. and Mack, M. and Maire, V.  
and Makela, A. and Makinen, H. and Malhado, A. C. M. and Mallik, A. and Manning, P. and Manzoni, S. and  
Marchetti, Z. and Marchino, L. and Marcilio-Silva, V. and Marcon, E. and Marignani, M. and Markesteijn, L. and  
915 Martin, A. and Martinez-Garza, C. and Martinez-Vilalta, J. and Maskova, T. and Mason, K. and Mason, N. and  
Massad, T. J. and Masse, J. and Mayrose, I. and McCarthy, J. and McCormack, M. L. and McCulloh, K. and  
McFadden, I. R. and McGill, B. J. and McPartland, M. Y. and Medeiros, J. S. and Medlyn, B. and Meerts, P. and  
Mehrabani, Z. and Meir, P. and Melo, F. P. L. and Mencuccini, M. and Meredieu, C. and Messier, J. and Meszaros, I.  
920 and Metsaranta, J. and Michaletz, S. T. and Michelaki, C. and Migalina, S. and Milla, R. and Miller, J. E. D. and  
Minden, V. and Ming, R. and Mokany, K. and Moles, A. T. and Molnar, A. t. and Molofsky, J. and Molz, M. and  
Montgomery, R. A. and Monty, A. and Moravcova, L. and Moreno-Martinez, A. and Moretti, M. and Mori, A. S.  
and Mori, S. and Morris, D. and Morrison, J. and Mucina, L. and Mueller, S. and Muir, C. D. and Muller, S. C. and  
Munoz, F. and Myers-Smith, I. H. and Myster, R. W. and Nagano, M. and Naidu, S. and Narayanan, A. and  
925 Natesan, B. and Negoita, L. and Nelson, A. S. and Neuschulz, E. L. and Ni, J. and Niedrist, G. and Nieto, J. and  
Niinemets, U. and Nolan, R. and Nottebrock, H. and Nouvellon, Y. and Novakovskiy, A. and Nutrient, N. and  
Nystuen, K. O. and O'Grady, A. and O'Hara, K. and O'Reilly-Nugent, A. and Oakley, S. and Oberhuber, W. and  
Ohtsuka, T. and Oliveira, R. and Ollerer, K. and Olson, M. E. and Onipchenko, V. and Onoda, Y. and Onstein, R.  
930 E. and Ordonez, J. C. and Osada, N. and Ostonen, I. and Ottaviani, G. and Otto, S. and Overbeck, G. E. and Ozinga,  
W. A. and Pahl, A. T. and Paine, C. E. T. and Pakeman, R. J. and Papageorgiou, A. C. and Parfionova, E. and  
Partel, M. and Patacca, M. and Paula, S. and Paule, J. and Pauli, H. and Pausas, J. G. and Peco, B. and Penuelas, J.  
and Perea, A. and Peri, P. L. and Petisco-Souza, A. C. and Petraglia, A. and Petritan, A. M. and Phillips, O. L. and  
Pierce, S. and Pillar, V. D. and Pisek, J. and Pomogaybin, A. and Poorter, H. and Portsmouth, A. and Poschod, P.  
and Potvin, C. and Pounds, D. and Powell, A. S. and Power, S. A. and Prinzing, A. and Puglielli, G. and Pysek, P.  
and Raevel, V. and Rammig, A. and Ransijn, J. and Ray, C. A. and Reich, P. B. and Reichstein, M. and Reid, D. E.  
935 B. and Rejou-Mechain, M. and de Dios, V. R. and Ribeiro, S. and Richardson, S. and Riibak, K. and Rillig, M. C.  
and Riviera, F. and Robert, E. M. R. and Roberts, S. and Robroek, B. and Roddy, A. and Rodrigues, A. V. and  
Rogers, A. and Rollinson, E. and Rolo, V. and Romermann, C. and Ronzhina, D. and Roscher, C. and Rosell, J. A.  
and Rosenfield, M. F. and Rossi, C. and Roy, D. B. and Royer-Tardif, S. and Ruger, N. and Ruiz-Peinado, R. and  
Rumpf, S. B. and Rusch, G. M. and Ryo, M. and Sack, L. and Saldana, A. and Salgado-Negret, B. and Salguero-  
940 Gomez, R. and Santa-Regina, I. and Santacruz-Garcia, A. C. and Santos, J. and Sardans, J. and Schamp, B. and  
Scherer-Lorenzen, M. and Schleuning, M. and Schmid, B. and Schmidt, M. and Schmitt, S. and Schneider, J. V.  
and Schowanek, S. D. and Schrader, J. and Schrodt, F. and Schuldt, B. and Schurr, F. and Selaya Garvizu, G. and  
Semchenko, M. and Seymour, C. and Sfair, J. C. and Sharpe, J. M. and Sheppard, C. S. and Sheremetiev, S. and  
Shiodera, S. and Shipley, B. and Shovon, T. A. and Siebenkas, A. and Sierra, C. and Silva, V. and Silva, M. and  
945 Sitzia, T. and Sjomani, H. and Slot, M. and Smith, N. G. and Sodhi, D. and Soltis, P. and Soltis, D. and Somers, B.





- 935 and Sonnier, G. and Sorensen, M. V. and Sosinski, E. E., Jr. and Soudzilovskaia, N. A. and Souza, A. F. and Spasojevic, M. and Sperandii, M. G. and Stan, A. B. and Stegen, J. and Steinbauer, K. and Stephan, J. G. and Sterck, F. and Stojanovic, D. B. and Strydom, T. and Suarez, M. L. and Svenning, J. C. and Svitkova, I. and Svitok, M. and Svoboda, M. and Swaine, E. and Swenson, N. and Tabarelli, M. and Takagi, K. and Tappeiner, U. and Tarifa, R. and Tauougourdeau, S. and Tavsanoğlu, C. and Te Beest, M. and Tedersoo, L. and Thiffault, N. and Thom, D. and Thomas, E. and Thompson, K. and Thornton, P. E. and Thuiller, W. and Tichy, L. and Tissue, D. and Tjoelker, M. G. and Tng, D. Y. P. and Tobias, J. and Torok, P. and Tarin, T. and Torres-Ruiz, J. M. and Tothmeresz, B. and Treurnicht, M. and Trivellone, V. and Trolliet, F. and Trotsiuk, V. and Tsakalos, J. L. and Tsiripidis, I. and Tyskland, N. and Umehara, T. and Usoltsev, V. and Vadeboncoeur, M. and Vaezi, J. and Valladares, F. and Vamosi, J. and van Bodegom, P. M. and van Breugel, M. and Van Cleemput, E. and van de Weg, M. and van der Merwe, S. and van der Plas, F. and van der Sande, M. T. and van Kleunen, M. and Van Meerbeek, K. and Vanderwel, M. and Vanselow, K. A. and Varhammar, A. and Varone, L. and Vasquez Valderrama, M. Y. and Vassilev, K. and Vellend, M. and Veneklaas, E. J. and Verbeeck, H. and Verheyen, K. and Vibrans, A. and Vieira, I. and Villacis, J. and Violle, C. and Vivek, P. and Wagner, K. and Waldram, M. and Waldron, A. and Walker, A. P. and Waller, M. and Walther, G. and Wang, H. and Wang, F. and Wang, W. and Watkins, H. and Watkins, J. and Weber, U. and Weedon, J. T. and Wei, L. and Weigelt, P. and Weiher, E. and Wells, A. W. and Wellstein, C. and Wenk, E. and Westoby, M. and Westwood, A. and White, P. J. and Whitten, M. and Williams, M. and Winkler, D. E. and Winter, K. and Womack, C. and Wright, I. J. and Wright, S. J. and Wright, J. and Pinho, B. X. and Ximenes, F. and Yamada, T. and Yamaji, K. and Yanai, R. and Yankov, N. and Yguel, B. and Zanini, K. J. and Zanne, A. E. and Zeleny, D. and Zhao, Y. P. and Zheng, J. and Zheng, J. and Zieminska, K. and Zirbel, C. R. and Zizka, G. and Zo-Bi, I. C. and Zotz, G. and Wirth, C.: Try Plant Trait Database - Enhanced Coverage and Open Access, *Glob Chang Biol*, 26, 119-188, <https://doi.org/10.1111/gcb.14904>, 2020.
- Kenzo, T., Ichie, T., Hattori, D., Itioka, T., Handa, C., Ohkubo, T., Kendawang, J. J., Nakamura, M., Sakaguchi, M., Takahashi, N., Okamoto, M., Tanaka-Oda, A., Sakurai, K., and Ninomiya, I.: Development of Allometric Relationships for Accurate Estimation of above- and Below-Ground Biomass in Tropical Secondary Forests in Sarawak, Malaysia, *Journal of Tropical Ecology*, 25, 371-386, <https://doi.org/10.1017/s0266467409006129>, 2009.
- 955 Ketterings, Q. M., Coe, R., Van Noordwijk, M., Ambagau, Y., and Palm, C. A.: Reducing Uncertainty in the Use of Allometric Biomass Equations for Predicting above-Ground Tree Biomass in Mixed Secondary Forests, *Forest Ecology and Management*, 146, 199-209, [https://doi.org/10.1016/s0378-1127\(00\)00460-6](https://doi.org/10.1016/s0378-1127(00)00460-6), 2001.
- 960 Kho, L. K. and Jepsen, M. R.: Carbon Stock of Oil Palm Plantations and Tropical Forests in Malaysia: A Review, *Singapore Journal of Tropical Geography*, 36, 249-266, <https://doi.org/10.1111/sjtg.12100>, 2015.
- King, D. A., Davies, S. J., Tan, S., and Noor, N. S. M.: The Role of Wood Density and Stem Support Costs in the Growth and Mortality of Tropical Trees, *Journal of Ecology*, 94, 670-680, <https://doi.org/10.1111/j.1365-2745.2006.01112.x>, 2006.
- 965 Kiyono, Y., Ito, E., Monda, Y., Toriyama, J., and Sum, T.: Effects of Large Aboveground Biomass Loss Events on the Deadwood and Litter Mass Dynamics of Seasonal Tropical Forests in Cambodia, *Tropics*, 27, 33-48, <https://doi.org/10.3759/tropics.MS18-05>, 2018.
- Kiyono, Y., Ochiai, Y., Chiba, Y., Asai, H., Saito, K., Shiraiwa, T., Horie, T., Songnouxhai, V., Navongxai, V., and Inoue, Y.: Predicting Chronosequential Changes in Carbon Stocks of Pachymorph Bamboo Communities in Slash-and-Burn Agricultural Fallow, Northern Lao People's Democratic Republic, *Journal of Forest Research*, 12, 371-383, <https://doi.org/10.1007/s10310-007-0028-6>, 2007.
- 970 Kramer, J. M. F., Zwiener, V. P., and Müller, S. C.: Biotic Homogenization and Differentiation of Plant Communities in Tropical and Subtropical Forests, 37, e14025, <https://doi.org/10.1111/cobi.14025>, 2023.
- Kumaresh, V., Rani, M. S. A., Vethamoni, P. I., Senthil, A., and Uma, D.: Morphological and Physiological Analysis of Vri-3 Cashew Plantations under Different Planting Density Systems, *International Journal of Environment and Climate Change*, 13, 3698-3706, <https://doi.org/10.9734/ijecc/2023/v13i103041>, 2023.
- Laurance, W. F., Sayer, J., and Cassman, K. G.: Agricultural Expansion and Its Impacts on Tropical Nature, *Trends in Ecology & Evolution*, 29, 107-116, <https://doi.org/10.1016/j.tree.2013.12.001>, 2013.
- 980 Laurans, M., Hérault, B., Vieilledent, G., and Vincent, G.: Vertical Stratification Reduces Competition for Light in Dense Tropical Forests, *Forest Ecology and Management*, 329, 79-88, <https://doi.org/10.1016/j.foreco.2014.05.059>, 2014.



- Leoni, E., Altesor, A., and Paruelo, J. M.: Explaining Patterns of Primary Production from Individual Level Traits, *Journal of Vegetation Science*, 20, 612-619, <https://doi.org/10.1111/j.1654-1103.2009.01080.x>, 2009.
- 985 Lewis, S. L., Sonké, B., Sunderland, T., Begne, S. K., Lopez-Gonzalez, G., Van Der Heijden, G. M. F., Phillips, O. L., Affum-Baffoe, K., Baker, T. R., Banin, L., Bastin, J.-F., Beeckman, H., Boeckx, P., Bogaert, J., De Cannière, C., Chezeaux, E., Clark, C. J., Collins, M., Djagbletey, G., Djuikouo, M. N. K., Droissart, V., Doucet, J.-L., Ewango, C. E. N., Fauset, S., Feldpausch, T. R., Folli, E. G., Gillet, J.-F., Hamilton, A. C., Harris, D. J., Hart, T. B., De Haulleville, T., Hladik, A., Hufkens, K., Huygens, D., Jeanmart, P., Jeffery, K. J., Kearsley, E., Leal, M. E., Lloyd, J., Lovett, J. C., Makana, J.-R., Malhi, Y., Marshall, A. R., Ojo, L., Peh, K. S. H., Pickavance, G., Poulsen, J. R., Reitsma, J. M., Sheil, D., Simo, M., Steppe, K., Taedoumg, H. E., Talbot, J., Taplin, J. R. D., Taylor, D., Thomas, S. C., Toirambe, B., Verbeeck, H., Vleminckx, J., White, L. J. T., Willcock, S., Woell, H., and Zemagho, L.: Above-Ground Biomass and Structure of 260 African Tropical Forests, *Philosophical Transactions of the Royal Society B: Biological Sciences*, 368, 20120295, <https://doi.org/10.1098/rstb.2012.0295>, 2013.
- 990 Li, Q., Chen, X. Z., Yuan, W. P., Lu, H. B., Shen, R. Q., Wu, S. B., Gong, F. X., Dai, Y. H., Liu, L. Y., Sun, Q. L., Zhang, C. Q., and Su, Y. X.: Remote Sensing of Seasonal Climatic Constraints on Leaf Phenology across Pantropical Evergreen Forest Biome, *Earths Future*, 9, e2021EF002160, <https://doi.org/10.1029/2021EF002160>, 2021.
- 995 Li, Y., Liu, C., Zhang, J., Yang, H., Xu, L., Wang, Q., Sack, L., Wu, X., Hou, J., and He, N.: Variation in Leaf Chlorophyll Concentration from Tropical to Cold-Temperate Forests: Association with Gross Primary Productivity, *Ecological Indicators*, 85, 383-389, <https://doi.org/10.1016/j.ecolind.2017.10.025>, 2018.
- 1000 Liang, J., Crowther, T. W., Picard, N., Wiser, S., Zhou, M., Alberti, G., Schulze, E.-D., McGuire, A. D., Bozzato, F., Pretzsch, H., De-Miguel, S., Paquette, A., Hérault, B., Scherer-Lorenzen, M., Barrett, C. B., Glick, H. B., Hengeveld, G. M., Nabuurs, G.-J., Pfautsch, S., Viana, H., Vibrans, A. C., Ammer, C., Schall, P., Verbyla, D., Tchebakova, N., Fischer, M., Watson, J. V., Chen, H. Y. H., Lei, X., Schelhaas, M.-J., Lu, H., Gianelle, D., Parfenova, E. I., Salas, C., Lee, E., Lee, B., Kim, H. S., Bruelheide, H., Coomes, D. A., Piotta, D., Sunderland, T., Schmid, B., Gourlet-Fleury, S., Sonké, B., Tavani, R., Zhu, J., Brandl, S., Vayreda, J., Kitahara, F., Searle, E. B., Neldner, V. J., Ngugi, M. R., Baraloto, C., Frizzera, L., Bałazy, R., Oleksyn, J., Zawila-Niedzwiecki, T., Bouriaud, O., Bussotti, F., Finér, L., Jaroszewicz, B., Jucker, T., Valladares, F., Jagodzinski, A. M., Peri, P. L., Gonmadje, C., Marthy, W., O'Brien, T., Martin, E. H., Marshall, A. R., Rovero, F., Bitariho, R., Niklaus, P. A., Alvarez-Loayza, P., Chamuya, N., Valencia, R., Mortier, F., Wortel, V., Engone-Obiang, N. L., Ferreira, L. V., Odeke, D. E., Vasquez, R. M., Lewis, S. L., and Reich, P. B.: Positive Biodiversity-Productivity Relationship Predominant in Global Forests, *Science*, 354, aaf8957-aaf8957, <https://doi.org/10.1126/science.aaf8957>, 2016.
- 1010 Liu, Z., Zhao, M., Zhang, H., Ren, T., Liu, C., and He, N.: Divergent Response and Adaptation of Specific Leaf Area to Environmental Change at Different Spatio-Temporal Scales Jointly Improve Plant Survival, *Global Change Biology*, 29, 1144-1159, <https://doi.org/10.1111/gcb.16518>, 2023.
- 1015 Luo, Z., Niu, J., He, S., Zhang, L., Chen, X., Tan, B., Wang, D., and Berndtsson, R.: Linking Roots, Preferential Flow, and Soil Moisture Redistribution in Deciduous and Coniferous Forest Soils, *Journal of Soils and Sediments*, 23, 1524-1538, <https://doi.org/10.1007/s11368-022-03375-w>, 2023.
- 1020 Lutz, J. A., Furniss, T. J., Johnson, D. J., Davies, S. J., Allen, D., Alonso, A., Anderson-Teixeira, K. J., Andrade, A., Baltzer, J., Becker, K. M. L., Blomdahl, E. M., Bourg, N. A., Bunyavejchewin, S., Burslem, D. F. R. P., Cansler, C. A., Cao, K., Cao, M., Cárdenas, D., Chang, L. W., Chao, K. J., Chao, W. C., Chiang, J. M., Chu, C., Chuyong, G. B., Clay, K., Condit, R., Cordell, S., Dattaraja, H. S., Duque, A., Ewango, C. E. N., Fischer, G. A., Fletcher, C., Freund, J. A., Giardina, C., Germain, S. J., Gilbert, G. S., Hao, Z., Hart, T., Hau, B. C. H., He, F., Hector, A., Howe, R. W., Hsieh, C. F., Hu, Y. H., Hubbell, S. P., Inman-Narahari, F. M., Itoh, A., Janik, D., Kassim, A. R., Kenfack, D., Korte, L., Král, K., Larson, A. J., Li, Y., Lin, Y., Liu, S., Lum, S., Ma, K., Makana, J. R., Malhi, Y., McMahon, S. M., McShea, W. J., Memiaghe, H. R., Mi, X., Morecroft, M., Musili, P. M., Myers, J. A., Novotny, V., De Oliveira, A., Ong, P., Orwig, D. A., Ostertag, R., Parker, G. G., Patankar, R., Phillips, R. P., Reynolds, G., Sack, L., Song, G. Z. M., Su, S. H., Sukumar, R., Sun, I. F., Suresh, H. S., Swanson, M. E., Tan, S., Thomas, D. W., Thompson, J., Uriarte, M., Valencia, R., Vicentini, A., Vrška, T., Wang, X., Weiblen, G. D., Wolf, A., Wu, S. H., Xu, H., Yamakura, T., Yap, S., and Zimmerman, J. K.: Global Importance of Large-Diameter Trees, *Global Ecology and Biogeography*, 27, 849-864, <https://doi.org/10.1111/geb.12747>, 2018.
- 1025



- 1030 Malimbwi, R. E., Eid, T., and Chamshama, S. A. O.: Allometric Tree Biomass and Volume Models in Tanzania, Sokoine University of Agriculture, Morogoro, Tanzania <https://doi.org/10.13140/RG.2.1.1891.5445>, 2016.
- Maréchaux, I., Bonal, D., Bartlett, M. K., Burban, B., Coste, S., Courtois, E. A., Dulormne, M., Goret, J.-Y., Mira, E., Mirabel, A., Sack, L., Stahl, C., and Chave, J.: Dry-Season Decline in Tree Sapflux Is Correlated with Leaf Turgor Loss Point in a Tropical Rainforest, 32, 2285-2297, <https://doi.org/10.1111/1365-2435.13188>, 2018.
- 1035 Miettinen, J., Shi, C., and Liew, S. C.: Deforestation Rates in Insular Southeast Asia between 2000 and 2010, *Global Change Biology*, 17, 2261-2270, <https://doi.org/10.1111/j.1365-2486.2011.02398.x>, 2011.
- Mog, B. and Nayak, M. G.: Leaf Morphological and Physiological Traits and Their Significance in Yield Improvement of Fifteen Cashew Varieties in West Coast Region of Karnataka, *International Journal of Current Microbiology and Applied Sciences*, 7, 1455-1469, <https://doi.org/10.20546/ijcmas.2018.707.173>, 2018.
- 1040 Mohd Nazip, S.: Tree Species Diversity and Forest Stand Structure of Pahang National Park, Malaysia, in: *Biodiversity Enrichment in a Diverse World*, edited by: Gbolagade Akeem, L., IntechOpen, Rijeka, Ch. 18, <https://doi.org/10.5772/50339>, 2012.
- Mrad, A., Manzoni, S., Oren, R., Vico, G., Lindh, M., and Katul, G.: Recovering the Metabolic, Self-Thinning, and Constant Final Yield Rules in Mono-Specific Stands, 3, <https://doi.org/10.3389/ffgc.2020.00062>, 2020.
- 1045 Naeem, S., Thompson, L. J., Lawler, S. P., Lawton, J. H., and Woodfin, R. M.: Declining Biodiversity Can Alter the Performance of Ecosystems, *Nature*, 368, 734-737, <https://doi.org/10.1038/368734a0>, 1994.
- Ndiaye, S., Djighaly, P. I., Diarra, A., and Dramé, F. A.: Comparative Study of the Carbon Stock of a Cashew Tree Plantation (*Anacardium Occidentale* L.) and Secondary Forest in Casamance, Senegal.
- Nguyen, T. D. and Kappas, M.: Estimating the Aboveground Biomass of an Evergreen Broadleaf Forest in Xuan Lien Nature Reserve, Thanh Hoa, Vietnam, Using Spot-6 Data and the Random Forest Algorithm, *International Journal of Forestry Research*, 2020, 1-13, <https://doi.org/10.1155/2020/4216160>, 2020.
- Nyirambangutse, B., Zibera, E., Uwizeye, F. K., Nsabimana, D., Bizuru, E., Pleijel, H., Uddling, J., and Wallin, G.: Carbon Stocks and Dynamics at Different Successional Stages in an Afromontane Tropical Forest, *Biogeosciences*, 14, 1285-1303, <https://doi.org/10.5194/bg-14-1285-2017>, 2017.
- 1055 Nzegbule, E. C., Onyema, M. C., Ndelekwute, S. C., and State, A.: Plant Species Richness and Soil Nutrients in a 35-Year Old Cashew Nut Plantation in Isuochi, Southern Nigeria.
- Olofsson, P. and Eklundh, L.: Estimation of Absorbed Par across Scandinavia from Satellite Measurements. Part II: Modeling and Evaluating the Fractional Absorption, Remote Sensing of Environment, 110, 240-251, <https://doi.org/10.1016/j.rse.2007.02.020>, 2007.
- 1060 Omuto, C. T., Vargas, R., Viatkin, K., and Yigini, Y. (Eds.): Lesson 4 – Spatial Modeling of Salt-Affected Soils, *Global Soil Salinity Map – Gssmap*, FAO, Rome, Italy, 2020.
- Ota, T., Ogawa, M., Shimizu, K., Kajisa, T., Mizoue, N., Yoshida, S., Takao, G., Hirata, Y., Furuya, N., Sano, T., Sokh, H., Ma, V., Ito, E., Toriyama, J., Monda, Y., Saito, H., Kiyono, Y., Chann, S., and Ket, N.: Aboveground Biomass Estimation Using Structure from Motion Approach with Aerial Photographs in a Seasonal Tropical Forest, *Forests*, 6, 3882-3898, <https://doi.org/10.3390/f6113882>, 2015.
- 1065 Pan, Y., Birdsey, R. A., Phillips, O. L., and Jackson, R. B.: The Structure, Distribution, and Biomass of the World's Forests, *Annual Review of Ecology, Evolution, and Systematics*, 44, 593-622, <https://doi.org/10.1146/annurev-ecolsys-110512-135914>, 2013.
- Parisi, F., Pioli, S., Lombardi, F., Fravolini, G., Marchetti, M., and Tognetti, R.: Linking Deadwood Traits with Saprophytic Invertebrates and Fungi in European Forests - a Review, 11, 423-436, <https://doi.org/10.3832/ifor2670-011>, 2018a.
- 1070 Parisi, F., Pioli, S., Lombardi, F., Fravolini, G., Marchetti, M., and Tognetti, R.: Linking Deadwood Traits with Saprophytic Invertebrates and Fungi in European Forests - a Review, *Iforest-Biogeosciences and Forestry*, 11, 423-436, <https://doi.org/10.3832/ifor2670-011>, 2018b.
- Pastorello, G., Trotta, C., Canfora, E., Chu, H., Christianson, D., Cheah, Y.-W., Poindexter, C., Chen, J., Elbashandy, A., Humphrey, M., Isaac, P., Polidori, D., Reichstein, M., Ribeca, A., Van Ingen, C., Vuichard, N., Zhang, L., Amiro, B., Ammann, C., Arain, M. A., Ardö, J., Arkebauer, T., Arndt, S. K., Arriga, N., Aubinet, M., Aurela, M., Baldocchi, D., Barr, A., Beamesderfer, E., Marchesini, L. B., Bergeron, O., Beringer, J., Bernhofer, C., Berveiller, D., Billesbach, D., Black, T. A., Blanken, P. D., Bohrer, G., Boike, J., Bolstad, P. V., Bonal, D., Bonnefond, J.-M., Bowling, D. R., Bracho, R., Brodeur, J., Brümmner, C., Buchmann, N., Burban, B., Burns, S. P., Buysse, P., Cale, P.,



- 1080 Cavagna, M., Cellier, P., Chen, S., Chini, I., Christensen, T. R., Cleverly, J., Collalti, A., Consalvo, C., Cook, B. D.,  
Cook, D., Coursolle, C., Cremonese, E., Curtis, P. S., D’Andrea, E., Da Rocha, H., Dai, X., Davis, K. J., Cinti, B.  
D., Grandcourt, A. D., Ligne, A. D., De Oliveira, R. C., Delpierre, N., Desai, A. R., Di Bella, C. M., Tommasi, P.  
D., Dolman, H., Domingo, F., Dong, G., Dore, S., Duce, P., Dufrêne, E., Dunn, A., Dušek, J., Eamus, D.,  
1085 Eichelmann, U., Elkhidir, H. A. M., Eugster, W., Ewenz, C. M., Ewers, B., Famulari, D., Fares, S., Feigenwinter, I.,  
Feitz, A., Fensholt, R., Filippa, G., Fischer, M., Frank, J., Galvagno, M., Gharun, M., Gianelle, D., Gielen, B.,  
Gioli, B., Gitelson, A., Goded, I., Goeckede, M., Goldstein, A. H., Gough, C. M., Goulden, M. L., Graf, A.,  
Griebel, A., Gruening, C., Grünwald, T., Hammerle, A., Han, S., Han, X., Hansen, B. U., Hanson, C., Hatakka, J.,  
He, Y., Hehn, M., Heinesch, B., Hinko-Najera, N., Hörtnagl, L., Hutley, L., Ibrom, A., Ikawa, H., Jackowicz-  
Korczynski, M., Janouš, D., Jans, W., Jassal, R., Jiang, S., Kato, T., Khomik, M., Klatt, J., Knohl, A., Knox, S.,  
1090 Kobayashi, H., Koerber, G., Kolle, O., Kosugi, Y., Kotani, A., Kowalski, A., Kruijt, B., Kurbatova, J., Kutsch, W.  
L., Kwon, H., Launiainen, S., Laurila, T., Law, B., Leuning, R., Li, Y., Liddell, M., Limousin, J.-M., Lion, M.,  
Liska, A. J., Lohila, A., López-Ballesteros, A., López-Blanco, E., Loubet, B., Loustau, D., Lucas-Moffat, A., Lüers,  
J., Ma, S., Macfarlane, C., Magliulo, V., Maier, R., Mammarella, I., Manca, G., Marcolla, B., Margolis, H. A.,  
Marras, S., Massman, W., Mastepanov, M., Matamala, R., Matthes, J. H., Mazzenga, F., McCaughey, H., McHugh,  
1095 I., McMillan, A. M. S., Merbold, L., Meyer, W., Meyers, T., Miller, S. D., Minerbi, S., Moderow, U., Monson, R.  
K., Montagnani, L., Moore, C. E., Moors, E., Moreaux, V., Moureaux, C., Munger, J. W., Nakai, T., Neiryck, J.,  
Nesic, Z., Nicolini, G., Noormets, A., Northwood, M., Noretto, M., Nouvellon, Y., Novick, K., Oechel, W., Olesen,  
J. E., Ourcival, J.-M., Papuga, S. A., Parmentier, F.-J., Paul-Limoges, E., Pavelka, M., Peichl, M., Pendall, E.,  
Phillips, R. P., Pilegaard, K., Pirk, N., Posse, G., Powell, T., Prasse, H., Prober, S. M., Rambal, S., Rannik, Ü., Raz-  
1100 Yaseef, N., Rebmann, C., Reed, D., Dios, V. R. D., Restrepo-Coupe, N., Reverter, B. R., Roland, M., Sabbatini, S.,  
Sachs, T., Saleska, S. R., Sánchez-Cañete, E. P., Sanchez-Mejia, Z. M., Schmid, H. P., Schmidt, M., Schneider, K.,  
Schrader, F., Schroder, I., Scott, R. L., Sedláč, P., Serrano-Ortíz, P., Shao, C., Shi, P., Shironya, I., Siebicke, L.,  
Šigut, L., Silberstein, R., Sirca, C., Spano, D., Steinbrecher, R., Stevens, R. M., Sturtevant, C., Suyker, A.,  
1105 Tagesson, T., Takanashi, S., Tang, Y., Tapper, N., Thom, J., Tomassucci, M., Tuovinen, J.-P., Urbanski, S.,  
Valentini, R., Van Der Molen, M., Van Gorsel, E., Van Huissteden, K., Varlagin, A., Verfaillie, J., Vesala, T.,  
Vincke, C., Vitale, D., Vygodskaya, N., Walker, J. P., Walter-Shea, E., Wang, H., Weber, R., Westermann, S.,  
Wille, C., Wofsy, S., Wohlfahrt, G., Wolf, S., Woodgate, W., Li, Y., Zampedri, R., Zhang, J., Zhou, G., Zona, D.,  
Agarwal, D., Biraud, S., Torn, M., and Papale, D.: The Fluxnet2015 Dataset and the Oneflux Processing Pipeline  
for Eddy Covariance Data, *Scientific Data*, 7, <https://doi.org/10.1038/s41597-020-0534-3>, 2020.
- 1110 Pearson, T. R. H., Brown, S., Murray, L., and Sidman, G.: Greenhouse Gas Emissions from Tropical Forest Degradation: An  
Underestimated Source, *Carbon Balance and Management*, 12, <https://doi.org/10.1186/s13021-017-0072-2>, 2017.
- Peou, H., Natarajan, I., Tianhua, H., and Philippe, D.: From Conservation to Sustainable Development—a Case Study of  
Angkor World Heritage Site, Cambodia, *Journal of Environmental Science and Engineering A*, 5, 141-155, 2016.
- 1115 Phompila, C., Lewis, M., Clarke, K., and Ostendorf, B.: Monitoring Expansion of Plantations in Lao Tropical Forests Using  
Landsat Time Series, *Land Surface Remote Sensing II*, 296-306, <https://doi.org/10.1117/12.2068283>,
- Pickering, B. J., Duff, T. J., Baillie, C., and Cawson, J. G.: Darker, Cooler, Wetter: Forest Understories Influence Surface  
Fuel Moisture, *Agricultural and Forest Meteorology*, 300, 108311, <https://doi.org/10.1016/j.agrformet.2020.108311>,  
2021.
- Poorter, L.: Functional Recovery of Secondary Tropical Forests (V1), *DANS Data Station Life Sciences* [dataset],  
1120 <https://doi.org/doi:10.17026/dans-zz5-hf3s>, 2021.
- R Core Team: R: A Language and Environment for Statistical Computing. R Foundation for Statistical Computing. Vienna.  
Austria, 2023.
- Rawat, M., Arunachalam, K., Arunachalam, A., Alatalo, J. M., and Pandey, R.: Assessment of Leaf Morphological,  
Physiological, Chemical and Stoichiometry Functional Traits for Understanding the Functioning of Himalayan  
1125 Temperate Forest Ecosystem, *Scientific Reports*, 11, <https://doi.org/10.1038/s41598-021-03235-6>, 2021.
- Reich, P. B., Uhl, C., Walters, M. B., and Ellsworth, D. S.: Leaf Lifespan as a Determinant of Leaf Structure and Function  
among 23 Amazonian Tree Species, *Oecologia*, 86, 16-24, <https://doi.org/10.1007/bf00317383>, 1991.
- Reyes, G., Brown, S., Chapman, J., and Lugo, A. E.: Wood Densities of Tropical Tree Species, U.S. Department of  
Agriculture, Forest Service, Southern Forest Experiment Station, <https://doi.org/10.2737/so-gr-88>, 1992.





- 1130 Rodell, M., Houser, P. R., Jambor, U., Gottschalck, J., Mitchell, K., Meng, C. J., Arsenault, K., Cosgrove, B., Radakovich, J., Bosilovich, M., Entin, J. K., Walker, J. P., Lohmann, D., and Toll, D.: The Global Land Data Assimilation System, *Bulletin of the American Meteorological Society*, 85, 381-394, <https://doi.org/10.1175/BAMS-85-3-381>, 2004.
- 1135 Román-Dañobeytia, F. J., Levy-Tacher, S. I., Macario-Mendoza, P., and Zúñiga-Morales, J.: Redefining Secondary Forests in the Mexican Forest Code: Implications for Management, Restoration, and Conservation, 5, 978-991, 2014.
- Rundel, P. W.: *Forest Habitats and Flora in Lao Pdr, Cambodia, and Vietnam*, Hanoi: WWF Indochina Programme, 1999.
- Saner, P., Loh, Y. Y., Ong, R. C., and Hector, A.: Carbon Stocks and Fluxes in Tropical Lowland Dipterocarp Rainforests in Sabah, Malaysian Borneo, *PLOS ONE*, 7, e29642, <https://doi.org/10.1371/journal.pone.0029642>, 2012.
- 1140 Santopuoli, G., Temperli, C., Alberdi, I., Barbeito, I., Bosela, M., Bottero, A., Klopčič, M., Lesinski, J., Panzacchi, P., and Tognetti, R.: Pan-European Sustainable Forest Management Indicators for Assessing Climate-Smart Forestry in Europe, 51, 1741-1750, <https://doi.org/10.1139/cjfr-2020-0166>, 2021.
- Schindelin, J., Arganda-Carreras, I., Frise, E., Kaynig, V., Longair, M., Pietzsch, T., Preibisch, S., Rueden, C., Saalfeld, S., Schmid, B., Tinevez, J.-Y., White, D. J., Hartenstein, V., Eliceiri, K., Tomancak, P., and Cardona, A.: Fiji: An Open-Source Platform for Biological-Image Analysis, *Nature Methods*, 9, 676-682, <https://doi.org/10.1038/nmeth.2019>, 2012.
- 1145 Schneider, C. A., Rasband, W. S., and Eliceiri, K. W.: Nih Image to Imagej: 25 Years of Image Analysis, *Nature Methods*, 9, 671-675, <https://doi.org/10.1038/nmeth.2089>, 2012.
- Senf, C., Mori, A. S., Müller, J., and Seidl, R.: The Response of Canopy Height Diversity to Natural Disturbances in Two Temperate Forest Landscapes, *Landscape Ecology*, 35, 2101-2112, <https://doi.org/10.1007/s10980-020-01085-7>, 2020.
- 1150 Senior, R. A., Hill, J. K., Benedick, S., and Edwards, D. P.: Tropical Forests Are Thermally Buffered Despite Intensive Selective Logging, 24, 1267-1278, <https://doi.org/10.1111/gcb.13914>, 2018.
- Senna, M. C. A., Costa, M. H., and Shimabukuro, Y. E.: Fraction of Photosynthetically Active Radiation Absorbed by Amazon Tropical Forest: A Comparison of Field Measurements, Modeling, and Remote Sensing, 110, <https://doi.org/10.1029/2004JG000005>, 2005.
- 1155 SERVIR-Mekong: Cambodia Biophysical Monitoring and Evaluation Dashboard, SERVIR-Mekong [dataset], 2024.
- Shannon, C. E.: A Mathematical Theory of Communication, *Bell System Technical Journal*, 27, 379-423, <https://doi.org/10.1002/j.1538-7305.1948.tb01338.x>, 1948.
- 1160 Shannon, V. L., Vanguelova, E. I., Morison, J. I. L., Shaw, L. J., and Clark, J. M.: The Contribution of Deadwood to Soil Carbon Dynamics in Contrasting Temperate Forest Ecosystems, *European Journal of Forest Research*, 141, 241-252, <https://doi.org/10.1007/s10342-021-01435-3>, 2022.
- Singh, M., Evans, D., Chevance, J.-B., Tan, B. S., Wiggins, N., Kong, L., and Sakhoeun, S.: Evaluating Remote Sensing Datasets and Machine Learning Algorithms for Mapping Plantations and Successional Forests in Phnom Kulen National Park of Cambodia, *PeerJ*, 7, e7841, <https://doi.org/10.7717/peerj.7841>, 2019.
- 1165 Singh, S. K., Srivastava, P. K., Gupta, M., Thakur, J. K., and Mukherjee, S.: Appraisal of Land Use/Land Cover of Mangrove Forest Ecosystem Using Support Vector Machine, *Environmental Earth Sciences*, 71, 2245-2255, <https://doi.org/10.1007/s12665-013-2628-0>, 2014.
- 1170 Slik, J. W. F., Aiba, S.-I., Brearley, F. Q., Cannon, C. H., Forshed, O., Kitayama, K., Nagamasu, H., Nilus, R., Payne, J., Paoli, G., Poulsen, A. D., Raes, N., Sheil, D., Sidiyasa, K., Suzuki, E., and van Valkenburg, J. L. C. H.: Environmental Correlates of Tree Biomass, Basal Area, Wood Specific Gravity and Stem Density Gradients in Borneo's Tropical Forests, *Global Ecology and Biogeography*, 19, 50-60, <https://doi.org/10.1111/j.1466-8238.2009.00489.x>, 2010.
- Sodhi, N. S., Koh, L. P., Brook, B. W., and Ng, P. K. L.: Southeast Asian Biodiversity: An Impending Disaster, *Trends in Ecology & Evolution*, 19, 654-660, <https://doi.org/10.1016/j.tree.2004.09.006>, 2004.
- 1175 Somaly, O., Sasaki, N., Kimchhin, S., Tsusaka, T. W., Shrestha, S., and Malyne, N.: Impact of Forest Cover Change in Phnom Kulen National Park on Downstream Local Livelihoods Along Siem Reap River, Cambodia, *International Journal of Environmental and Rural Development*, 11, 93-99, [https://doi.org/https://doi.org/10.32115/ijerd.11.1\\_93](https://doi.org/https://doi.org/10.32115/ijerd.11.1_93), 2020.



- 1180 Sovann, C., Tagesson, T., Kok, S., and Olin, S.: Forest Inventory, Leaf Area Index, and Leaf Functional Traits of Various Land Cover Classes in Kulen, Cambodia, Zenodo [dataset], <https://doi.org/10.5281/zenodo.10146582>, 2024a.
- Sovann, C., Tagesson, T., Vestin, P., Kok, S., and Olin, S.: Daily Fraction of Photosynthetically Active Radiation (Fpar), Edaphic, and Weather Conditions from 20220410 to 20230409 in Kulen, Cambodia, Zenodo [dataset], <https://doi.org/10.5281/zenodo.10159726>, 2024b.
- 1185 Sovu, Tigabu, M., Savadogo, P., Odén, P. C., and Xayvongsa, L.: Recovery of Secondary Forests on Swidden Cultivation Fallows in Laos, *Forest Ecology and Management*, 258, 2666-2675, <https://doi.org/10.1016/j.foreco.2009.09.030>, 2009.
- Steur, G., Ter Steege, H., Verburg, R. W., Sabatier, D., Molino, J.-F., Bánki, O. S., Castellanos, H., Stropp, J., Fonty, É., Ruyschaert, S., Galbraith, D., Kalamandeen, M., Van Andel, T. R., Brienens, R., Phillips, O. L., Feeley, K. J., Terborgh, J., and Verweij, P. A.: Relationships between Species Richness and Ecosystem Services in Amazonian Forests Strongly Influenced by Biogeographical Strata and Forest Types, *Scientific Reports*, 12, <https://doi.org/10.1038/s41598-022-09786-6>, 2022.
- 1190 Stibig, H. J., Achard, F., Carboni, S., Raši, R., and Miettinen, J.: Change in Tropical Forest Cover of Southeast Asia from 1990 to 2010, *Biogeosciences*, 11, 247-258, <https://doi.org/10.5194/bg-11-247-2014>, 2014.
- Stirbet, A., Lazár, D., Guo, Y., and Govindjee, G.: Photosynthesis: Basics, History and Modelling, *Annals of Botany*, 126, 511-537, <https://doi.org/10.1093/aob/mcz171>, 2020.
- 1195 Swedish NFI: Swedish National Forest Inventory and Swedish Soil Inventory: Field Work Instructions 2019, The Department of Forest Resource Management. Swedish University of Agricultural Sciences, Umeå, Sweden, 504, 2019.
- Tang, C., Liu, Y., Li, Z., Guo, L., Xu, A., and Zhao, J.: Effectiveness of Vegetation Cover Pattern on Regulating Soil Erosion and Runoff Generation in Red Soil Environment, Southern China, *Ecological Indicators*, 129, 107956, <https://doi.org/10.1016/j.ecolind.2021.107956>, 2021.
- 1200 ter Steege, H., Pitman, N. C. A., do Amaral, I. L., de Souza Coelho, L., de Almeida Matos, F. D., de Andrade Lima Filho, D., Salomão, R. P., Wittmann, F., Castilho, C. V., Guevara, J. E., Veiga Carim, M. d. J., Phillips, O. L., Magnusson, W. E., Sabatier, D., Revilla, J. D. C., Molino, J.-F., Ireme, M. V., Martins, M. P., da Silva Guimarães, J. R., Ramos, J. F., Bánki, O. S., Piedade, M. T. F., Cárdenas López, D., Rodrigues, D. d. J., Demarchi, L. O., Schöngart, J., Almeida, E. J., Barbosa, L. F., Cavalheiro, L., dos Santos, M. C. V., Luize, B. G., de Leão Novo, E. M. M., Vargas, P. N., Silva, T. S. F., Venticinque, E. M., Manzatto, A. G., Reis, N. F. C., Terborgh, J., Casula, K. R., Honorio Coronado, E. N., Monteagudo Mendoza, A., Montero, J. C., Costa, F. R. C., Feldpausch, T. R., Quresma, A. C., Castaño Arboleda, N., Zartman, C. E., Killeen, T. J., Marimon, B. S., Marimon-Junior, B. H., Vasquez, R., 1210 Mostacedo, B., Assis, R. L., Baraloto, C., do Amaral, D. D., Engel, J., Petronelli, P., Castellanos, H., de Medeiros, M. B., Simon, M. F., Andrade, A., Camargo, J. L., Laurance, W. F., Laurance, S. G. W., Manigujaje Rincón, L., Schietti, J., Sousa, T. R., de Sousa Farias, E., Lopes, M. A., Magalhães, J. L. L., Nascimento, H. E. M., de Queiroz, H. L., Aymard C, G. A., Brienens, R., Stevenson, P. R., Araujo-Murakami, A., Baker, T. R., Cintra, B. B. L., Feitosa, Y. O., Mogollón, H. F., Duivenvoorden, J. F., Peres, C. A., Silman, M. R., Ferreira, L. V., Lozada, J. R., 1215 Comiskey, J. A., Draper, F. C., de Toledo, J. J., Damasco, G., García-Villacorta, R., Lopes, A., Vicentini, A., Cornejo Valverde, F., Alonso, A., Arroyo, L., Dallmeier, F., Gomes, V. H. F., Jimenez, E. M., Neill, D., Peñuela Mora, M. C., Noronha, J. C., de Aguiar, D. P. P., Barbosa, F. R., Bredin, Y. K., de Sá Carpanedo, R., Carvalho, F. A., de Souza, F. C., Feeley, K. J., Gribel, R., Hugaasen, T., Hawes, J. E., Pansonato, M. P., Ríos Paredes, M., Barlow, J., Berenguer, E., da Silva, I. B., Ferreira, M. J., Ferreira, J., Fine, P. V. A., Guedes, M. C., Levis, C., Licona, J. C., Villa Zegarra, B. E., Vos, V. A., Cerón, C., Durgante, F. M., Fonty, É., Henkel, T. W., Householder, J. E., Huamantupa-Chuquimaco, I., Pos, E., Silveira, M., Stropp, J., Thomas, R., Daly, D., Dexter, K. G., Milliken, W., Molina, G. P., Pennington, T., Vieira, I. C. G., Weiss Albuquerque, B., Campelo, W., Fuentes, A., Klitgaard, B., Pena, J. L. M., Tello, J. S., Vriesendorp, C., Chave, J., Di Fiore, A., Hilário, R. R., de Oliveira Pereira, L., Phillips, J. F., Rivas-Torres, G., van Andel, T. R., von Hildebrand, P., Balee, W., Barbosa, E. M., de Matos 1225 Bonates, L. C., Dávila Doza, H. P., Zárate Gómez, R., Gonzales, T., Gallardo Gonzales, G. P., Hoffman, B., Junqueira, A. B., Malhi, Y., de Andrade Miranda, I. P., Pinto, L. F. M., Prieto, A., Rudas, A., Ruschel, A. R., Silva, N., Vela, C. I. A., Zent, E. L., Zent, S., Cano, A., Carrero Márquez, Y. A., Correa, D. F., Costa, J. B. P., Flores, B. M., Galbraith, D., Holmgren, M., Kalamandeen, M., Lobo, G., Torres Montenegro, L., Nascimento, M. T., Oliveira,





- 1230 A. A., Pombo, M. M., Ramirez-Angulo, H., Rocha, M., Scudeller, V. V., Sierra, R., Tirado, M., Umaña, M. N., van der Heijden, G., Vilanova Torre, E., Reategui, M. A. A., Baider, C., Balslev, H., Cárdenas, S., Casas, L. F., Endara, M. J., Farfan-Rios, W., Ferreira, C., Linares-Palomino, R., Mendoza, C., Mesones, I., Parada, G. A., Torres-Lezama, A., Urrego Giraldo, L. E., Villarroel, D., Zagt, R., Alexiades, M. N., de Oliveira, E. A., Garcia-Cabrera, K., Hernandez, L., Cuenca, W. P., Pansini, S., Pauletto, D., Ramirez Arevalo, F., Sampaio, A. F., Valderrama Sandoval, E. H., Gamarra, L. V., Levesley, A., Pickavance, G., and Melgaço, K.: Mapping Density, Diversity and Species-Richness of the Amazon Tree Flora, *Communications Biology*, 6, 1130, <https://doi.org/10.1038/s42003-023-05514-6>, 2023.
- 1235 Than, S., Vesa, L., Vanna, S., Hyvönen, P., Korhonen, K., Gael, S., Matieu, H., and van Rijn, M.: Field Manual for the National Forest Inventory of Cambodia, 2nd Eds, Forest Administration of the Ministry of Agriculture, Forestry and Fisheries & Food and Agriculture Organization of the United Nations, Phnom Penh, Cambodia, 2018.
- 1240 Theilade, I., Phourin, C., Schmidt, L., Meilby, H., Van De Bult, M., and Friberg, K. G.: Evergreen Forest Types of the Central Plains in Cambodia: Floristic Composition and Ecological Characteristics, *Nordic Journal of Botany*, 2022, <https://doi.org/10.1111/njb.03494>, 2022.
- Thiel, S., Tschapka, M., Heymann, E. W., and Heer, K.: Vertical Stratification of Seed-Dispersing Vertebrate Communities and Their Interactions with Plants in Tropical Forests, 96, 454-469, <https://doi.org/10.1111/brv.12664>, 2021.
- 1245 Thoeun, H. C.: Observed and Projected Changes in Temperature and Rainfall in Cambodia, *Weather and Climate Extremes*, 7, 61-71, <https://doi.org/10.1016/j.wace.2015.02.001>, 2015.
- Tilman, D., Lehman, C. L., and Thomson, K. T.: Plant Diversity and Ecosystem Productivity: Theoretical Considerations, *Proc Natl Acad Sci U S A*, 94, 1857-1861, <https://doi.org/10.1073/pnas.94.5.1857>, 1997.
- 1250 Tito, R., Salinas, N., Cosio, E. G., Boza Espinoza, T. E., Muñoz, J. G., Aragón, S., Nina, A., and Roman-Cuesta, R. M.: Secondary Forests in Peru: Differential Provision of Ecosystem Services Compared to Other Post-Deforestation Forest Transitions, *Ecology and Society*, 27, <https://doi.org/10.5751/es-13446-270312>, 2022.
- Tláskal, V., Brabcová, V., Větrovský, T., Jomura, M., López-Mondéjar, R., Monteiro, L. M. O., Saraiva, J. P., Human, Z. R., Cajthaml, T., Rocha, U. N. d., and Baldrian, P.: Complementary Roles of Wood-Inhabiting Fungi and Bacteria Facilitate Deadwood Decomposition, 6, 10.1128/msystems.01078-20, <https://doi.org/10.1128/msystems.01078-20>, 2021.
- 1255 Townsend, A. R., Cleveland, C. C., Houlton, B. Z., Alden, C. B., and White, J. W.: Multi-Element Regulation of the Tropical Forest Carbon Cycle, *Frontiers in Ecology and the Environment*, 9, 9-17, <https://doi.org/10.1890/100047.2011>.
- Tynsong, H., Dkhar, M., and Tiwari, B. K.: Tree Diversity and Vegetation Structure of the Tropical Evergreen Forests of the Southern Slopes of Meghalaya, North East India, *Asian Journal of Forestry*, 6, <https://doi.org/10.13057/asianjfor/r060104>, 2022.
- 1260 Van Do, T., Yamamoto, M., Kozan, O., Hai, V. D., Trung, P. D., Thang, N. T., Hai, L. T., Nam, V. T., Hung, T. T., Van Thang, H., Manh, T. D., Khiem, C. C., Lam, V. T., Hung, N. Q., Quy, T. H., Tuyen, P. Q., Bon, T. N., Phuong, N. T. T., Khuong, N. V., Van Tuan, N., Ha, D. T. H., Long, T. H., Van Thuyet, D., Trieu, D. T., Van Thinh, N., Hai, T. A., Trung, D. Q., Van Bich, N., Dang, D. H., Dung, P. T., Hoang, N. H., Hanh, L. T., Quang, P. M., Huong, N. T. T., Son, H. T., Son, N. T., Van Anh, N. T., Anh, N. T. H., Sam, P. D., Nhung, H. T., Van Thanh, H., Thinh, N. H., Van, T. H., Luong, H. T., and Hung, B. K.: Ecoregional Variations of Aboveground Biomass and Stand Structure in Evergreen Broadleaved Forests, *Journal of Forestry Research*, 31, 1713-1722, <https://doi.org/10.1007/s11676-019-00969-y>, 2020.
- 1265 van Galen, L. G., Jordan, G. J., and Baker, S. C.: Relationships between Coarse Woody Debris Habitat Quality and Forest Maturity Attributes, 1, e55, <https://doi.org/10.1111/csp2.55>, 2019.
- van Haren, J., de Oliveira Jr, R. C., Beldini, P. T., de Camargo, P. B., Keller, M., and Saleska, S.: Tree Species Effects on Soil Properties and Greenhouse Gas Fluxes in East-Central Amazonia: Comparison between Monoculture and Diverse Forest, 45, 709-718, <https://doi.org/10.1111/btp.12061>, 2013.
- 1275 Van, Y. T. and Cochard, R.: Tree Species Diversity and Utilities in a Contracting Lowland Hillside Rainforest Fragment in Central Vietnam, *Forest Ecosystems*, 4, 9, <https://doi.org/10.1186/s40663-017-0095-x>, 2017.



- Vestin, P., Mölder, M., Kljun, N., Cai, Z., Hasan, A., Holst, J., Klemedtsson, L., and Lindroth, A.: Impacts of Clear-Cutting of a Boreal Forest on Carbon Dioxide, Methane and Nitrous Oxide Fluxes, <https://doi.org/10.3390/f11090961>, 2020.
- 1280 Victor, A. D., Valery, N. N., Boris, N., Aimé, V. B. T., and Louis, Z.: Carbon Storage in Cashew Plantations in Central Africa: Case of Cameroon, *Carbon Management*, 12, 25-35, <https://doi.org/10.1080/17583004.2020.1858682>, 2021.
- Waide, R. B., Willig, M. R., Steiner, C. F., Mittelbach, G., Gough, L., Dodson, S. I., Juday, G. P., and Parmenter, R.: The Relationship between Productivity and Species Richness, *Annual Review of Ecology and Systematics*, 30, 257-300, <https://doi.org/10.1146/annurev.ecolsys.30.1.257>, 1999.
- 1285 Wang, R., Yu, G., He, N., Wang, Q., Zhao, N., and Xu, Z.: Latitudinal Variation of Leaf Morphological Traits from Species to Communities Along a Forest Transect in Eastern China, *Journal of Geographical Sciences*, 26, 15-26, <https://doi.org/10.1007/s11442-016-1251-x>, 2016.
- Wang, S., Fu, B. J., Gao, G. Y., Yao, X. L., and Zhou, J.: Soil Moisture and Evapotranspiration of Different Land Cover Types in the Loess Plateau, China, *Hydrol. Earth Syst. Sci.*, 16, 2883-2892, <https://doi.org/10.5194/hess-16-2883-2012>, 2012.
- 1290 Wang, W., Liu, H., Zhang, J., Li, Z., Wang, L., Wang, Z., Wu, Y., Wang, Y., and Liang, C.: Effect of Grazing Types on Community-Weighted Mean Functional Traits and Ecosystem Functions on Inner Mongolian Steppe, China, *Sustainability*, 12, 7169, <https://doi.org/10.3390/su12177169>, 2020.
- West, G. B. and Brown, J. H.: The Origin of Allometric Scaling Laws in Biology from Genomes to Ecosystems: Towards a Quantitative Unifying Theory of Biological Structure and Organization, *J Exp Biol*, 208, 1575-1592, <https://doi.org/10.1242/jeb.01589>, 2005.
- 1295 Whitmore, T. C.: *An Introduction to Tropical Forests*, 2nd ed, Oxford University Press Oxford, England, Oxford, England 1998.
- Woodall, C. W., Evans, D. M., Fraver, S., Green, M. B., Lutz, D. A., and D'Amato, A. W.: Real-Time Monitoring of Deadwood Moisture in Forests: Lessons Learned from an Intensive Case Study, *Canadian Journal of Forest Research*, 50, 1244-1252, <https://doi.org/10.1139/cjfr-2020-0110>, 2020.
- 1300 Wright, I. J., Reich, P. B., Westoby, M., Ackerly, D. D., Baruch, Z., Bongers, F., Cavender-Bares, J., Chapin, T., Cornelissen, J. H. C., Diemer, M., Flexas, J., Garnier, E., Groom, P. K., Gulias, J., Hikosaka, K., Lamont, B. B., Lee, T., Lee, W., Lusk, C., Midgley, J. J., Navas, M.-L., Niinemets, Ü., Oleksyn, J., Osada, N., Poorter, H., Poot, P., Prior, L., Pyankov, V. I., Roumet, C., Thomas, S. C., Tjoelker, M. G., Veneklaas, E. J., and Villar, R.: The Worldwide Leaf Economics Spectrum, *Nature*, 428, 821-827, <https://doi.org/10.1038/nature02403>, 2004.
- 1305 Xiao, Z. Q., Liang, S. L., Sun, R., Wang, J. D., and Jiang, B.: Estimating the Fraction of Absorbed Photosynthetically Active Radiation from the Modis Data Based Glass Leaf Area Index Product, *Remote Sensing of Environment*, 171, 105-117, <https://doi.org/10.1016/j.rse.2015.10.016>, 2015.
- 1310 Yen, V. T. and Cochar, R.: Chapter 5 - Structure and Diversity of a Lowland Tropical Forest in Thua Thien Hue Province, in: *Redefining Diversity & Dynamics of Natural Resources Management in Asia*, Volume 3, edited by: Thang, T. N., Dung, N. T., Hulse, D., Sharma, S., and Shivakoti, G. P., Elsevier, 71-85, <https://doi.org/10.1016/B978-0-12-805452-9.00005-9>, 2017.
- 1315 Zanne, A. E., Lopez-Gonzalez, G., Coomes, D. A., Ilic, J., Jansen, S., Lewis, S. L., Miller, R. B., Swenson, N. G., Wiemann, M. C., and Chave, J.: Data From: Towards a Worldwide Wood Economics Spectrum [dataset], <https://doi.org/10.5061/dryad.234>, 2009.
- Zhang, P., Hefting, M. M., Soons, M. B., Kowalchuk, G. A., Rees, M., Hector, A., Turnbull, L. A., Zhou, X., Guo, Z., Chu, C., Du, G., and Hautier, Y.: Fast and Furious: Early Differences in Growth Rate Drive Short-Term Plant Dominance and Exclusion under Eutrophication, *Ecology*, 10, 10116-10129, <https://doi.org/10.1002/ece3.6673>, 2020.
- 1320 Zhao, W., Tan, W., and Li, S.: High Leaf Area Index Inhibits Net Primary Production in Global Temperate Forest Ecosystems, *Environmental Science and Pollution Research*, 28, 22602-22611, <https://doi.org/10.1007/s11356-020-11928-0>, 2021.
- 1325 Ziegler, S. S.: A Comparison of Structural Characteristics between Old-Growth and Postfire Second-Growth Hemlock-Hardwood Forests in Adirondack Park, New York, U. S. A, 9, 373-389, <https://doi.org/10.1046/j.1365-2699.2000.00191.x>, 2000.

<https://doi.org/10.5194/egusphere-2024-3784>

Preprint. Discussion started: 7 January 2025

© Author(s) 2025. CC BY 4.0 License.

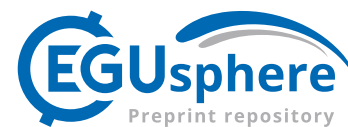

Zin, I. I. S. and Mitlöhner, R.: Species Composition and Stand Structure of Primary and Secondary Moist Evergreen Forests in the Tanintharyi Nature Reserve (Tnr) Buffer Zone, Myanmar, *Open Journal of Forestry*, 10, 445-459, <https://doi.org/10.4236/ojf.2020.104028> 2020.
